# Supplementary material for: Genome-wide burden and association analyses implicate copy number variations in asthma risk among children and young adults from Latin America
Source: PubMed Central journal article supplement (PMC6160443; doi:10.1038/s41598-018-32837-w), 2018-09-27
Supplement: 41598_2018_32837_MOESM1_ESM.pdf [file 41598_2018_32837_MOESM1_ESM.pdf]

Genome-wide burden and association analyses implicate copy number variations in asthma risk among children and young adults from Latin America

Pablo Oliveira, Gustavo N. O. Costa, Andresa K. A. Damasceno, Fernando P. Hartwig, George C. G. Barbosa, Camila A. Figueiredo, Rita de C. Ribeiro-Silva, Alexandre Pereira, M. Fernanda Lima-Costa, Fernanda S. Kehdy, Eduardo Tarazona-Santos, Bernardo L. Horta, Laura C. Rodrigues, Rosemeire L. Fiaccone, Maurício L. Barreto

## Content

|                               |    |
|-------------------------------|----|
| <b>Supplementary Figure 1</b> | 3  |
| <b>Supplementary Figure 2</b> | 4  |
| <b>Supplementary Figure 3</b> | 5  |
| <b>Supplementary Table 1</b>  | 6  |
| <b>Supplementary Table 2</b>  | 87 |
| <b>Supplementary Table 3</b>  | 91 |

## SUPPLEMENTARY INFORMATION

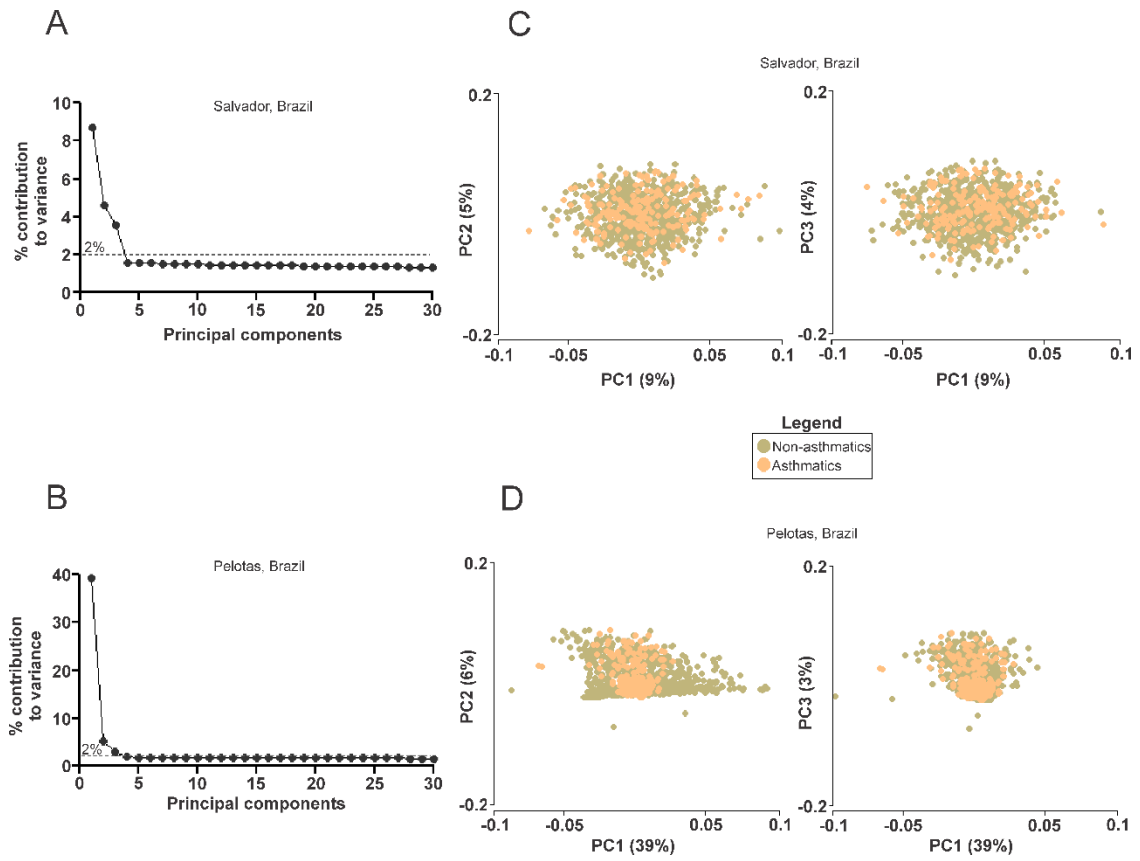

**Supplementary Figure 1. Principal components analysis (PCA) of the two cohorts analyzed in this study.** Scree plots showing the % of contribution to data variance for the first 30 principal components (PCs) in Salvador (**A**) and Pelotas (**B**). In both cohorts, the eigenvalues for the first 3 PCs are the only greater than 2%. 2D dot plots of the most informative PCs (PC1 vs PC2 and PC1 vs PC3) in Salvador (**C**) and Pelotas (**D**).

SUPPLEMENTARY INFORMATION

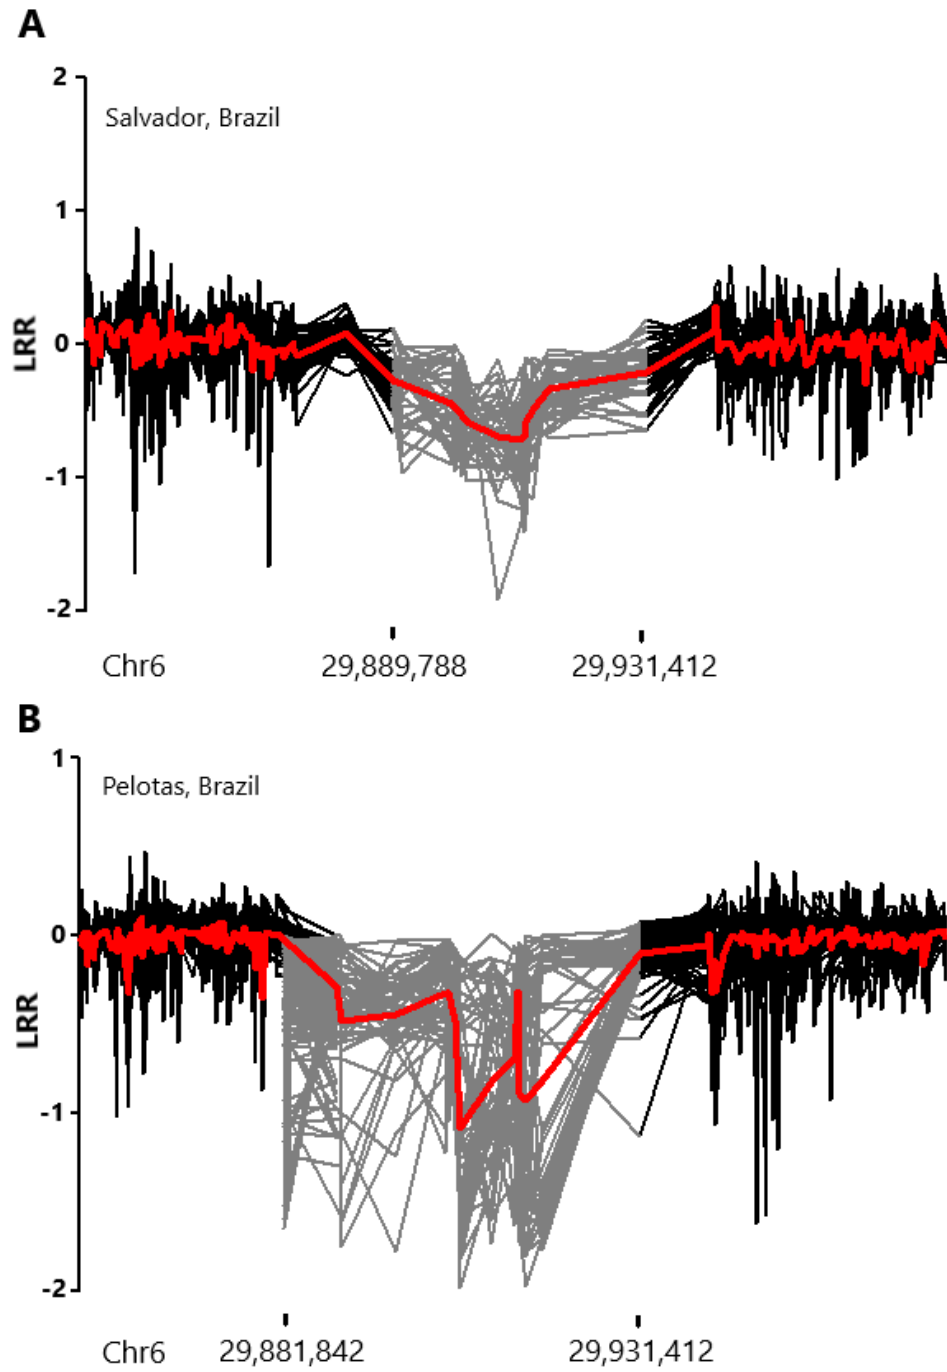

**Supplementary Figure 2. Copy number variation region (CNVR) identified at 6p22.1.** Log<sub>2</sub> of R ratio (LRR) of individuals carrying the 6p22.1 deletion in Salvador (**A**) and Pelotas (**B**). Red line: mean LRR from individuals carrying the CNVR. Human genome assembly: GRCh38.

SUPPLEMENTARY INFORMATION

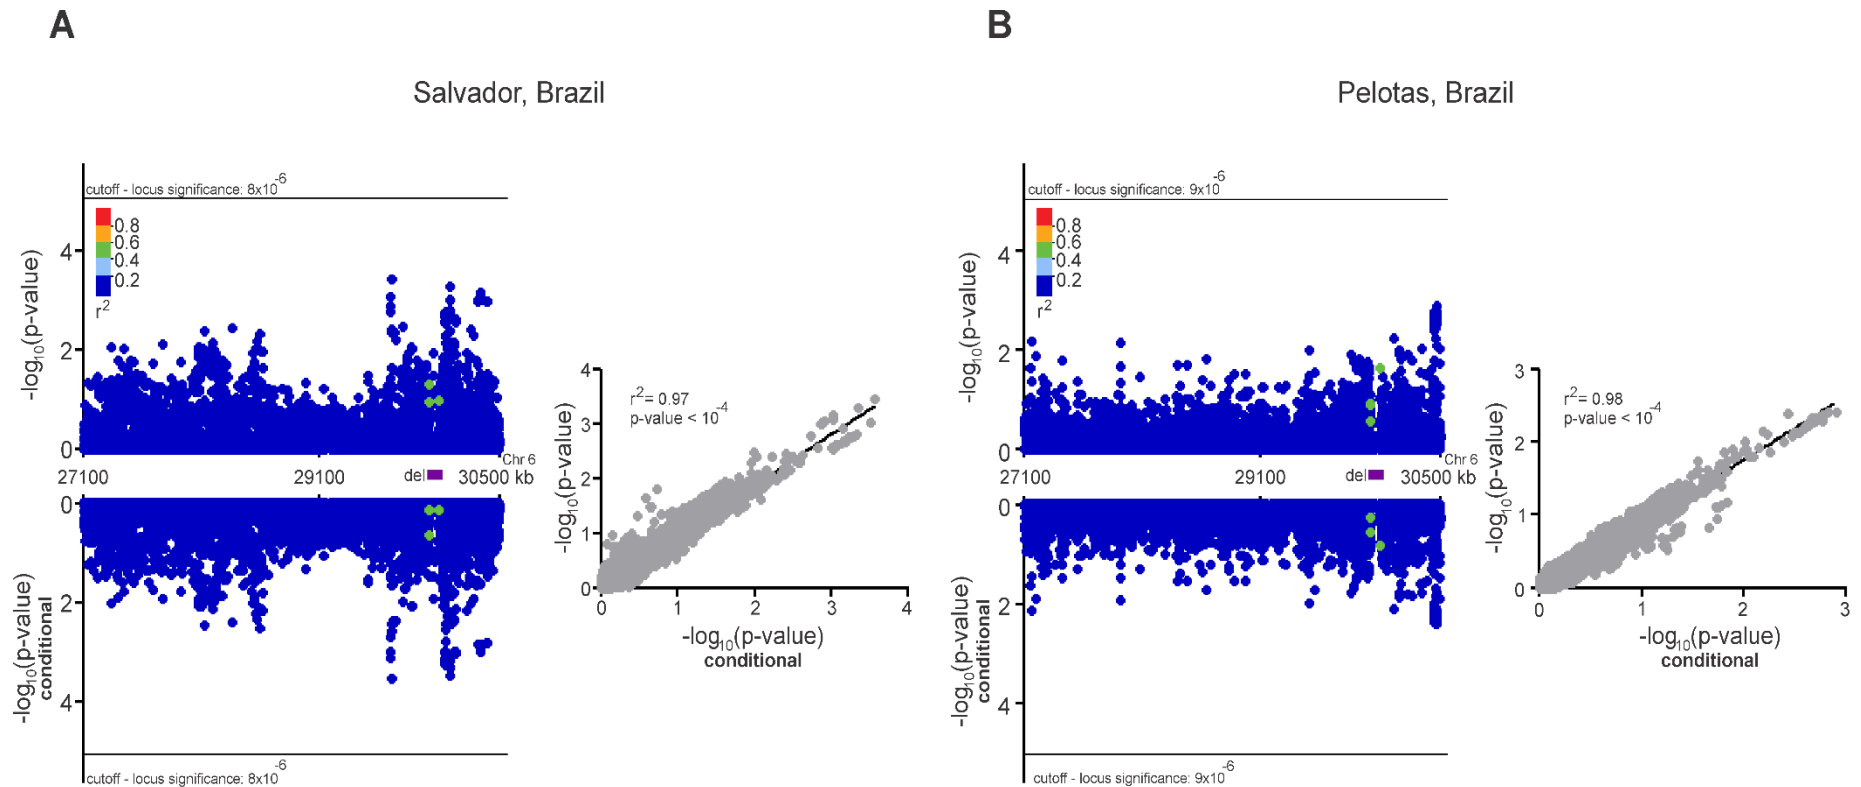

**Supplementary Figure 3. Fine-mapping of the 6p22.1 locus.** SNPs (Illumina HumanOmni 2.5-8v1) in the entire 6p22.1 region (6:27,100,000-30,500,000; RefSeq: GRCh38) were evaluated. The association of SNPs with asthma was investigated by logistic regression, under an additive model. Sex, age and principal components (PC1, PC2 and PC3) were included in the regression model as covariates [results are shown as  $-\log_{10}(\text{p-value})$ ]. In the conditional analysis, deletion genotype was used as an additional covariate [results are shown as  $-\log_{10}(\text{p-value})$  conditional]. Locus p-value thresholds are represented by 0.05/number of SNPs tested. In Salvador (A) and Pelotas (B), 6057 and 5782 SNPs (after quality control) were investigated, respectively. Pearson linear correlation between  $-\log_{10}(\text{p-value})$  adjusted for deletion genotypes and  $-\log_{10}(\text{p-value})$  without adjustment were conducted. The limits of the deletion associated with asthma are symbolized by purple bars. Linkage disequilibrium ( $r^2$ ) between the deletion and any SNP in the locus was also investigated.

SUPPLEMENTARY INFORMATION

**Supplementary Table 1. Frequent copy number variation regions detected in individuals from Salvador-SCAALA by PennCNV and QuantiSNP**

| Chr                 | Start     | End       | Size (bp) | Frequency (%) |
|---------------------|-----------|-----------|-----------|---------------|
| <i>Duplications</i> |           |           |           |               |
| 1                   | 6416226   | 6512391   | 96165     | 0.92          |
| 1                   | 19439832  | 19472431  | 32599     | 0.06          |
| 1                   | 38301463  | 38318319  | 16856     | 0.06          |
| 1                   | 43348396  | 43378597  | 30201     | 0.57          |
| 1                   | 62175420  | 62201295  | 25875     | 0.06          |
| 1                   | 66917226  | 66950709  | 33483     | 0.06          |
| 1                   | 67546571  | 67555819  | 9248      | 0.06          |
| 1                   | 69412199  | 69429633  | 17434     | 0.06          |
| 1                   | 69649654  | 69666252  | 16598     | 0.06          |
| 1                   | 77653328  | 77723536  | 70208     | 0.17          |
| 1                   | 86037699  | 86161554  | 123855    | 0.06          |
| 1                   | 108012816 | 108017831 | 5015      | 0.06          |
| 1                   | 147295411 | 147320234 | 24823     | 0.06          |
| 1                   | 151369094 | 151378584 | 9490      | 0.06          |
| 1                   | 154945225 | 155087375 | 142150    | 1.09          |
| 1                   | 159741082 | 159758934 | 17852     | 0.06          |
| 1                   | 167226887 | 167235272 | 8385      | 0.06          |
| 1                   | 182998334 | 183010425 | 12091     | 0.06          |
| 1                   | 191800041 | 191847632 | 47591     | 0.34          |
| 1                   | 197850936 | 197909571 | 58635     | 0.06          |
| 1                   | 199181530 | 199189581 | 8051      | 0.06          |
| 1                   | 211989059 | 212026247 | 37188     | 0.17          |
| 1                   | 221713474 | 221720389 | 6915      | 0.06          |
| 1                   | 223454297 | 223468098 | 13801     | 0.23          |
| 1                   | 232652148 | 232701588 | 49440     | 0.06          |
| 1                   | 236960447 | 236971011 | 10564     | 0.23          |
| 1                   | 241382386 | 241385280 | 2894      | 0.06          |
| 1                   | 241958238 | 241971884 | 13646     | 0.11          |
| 1                   | 247664434 | 248272529 | 608095    | 0.52          |
| 1                   | 248520558 | 248526493 | 5935      | 0.29          |
| 2                   | 555176    | 720238    | 165062    | 0.17          |
| 2                   | 796046    | 911633    | 115587    | 0.06          |
| 2                   | 18150562  | 18161979  | 11417     | 0.06          |
| 2                   | 24632070  | 24655342  | 23272     | 0.06          |
| 2                   | 35177521  | 35183708  | 6187      | 0.06          |
| 2                   | 35452014  | 35492456  | 40442     | 0.11          |
| 2                   | 49460521  | 49465782  | 5261      | 0.23          |
| 2                   | 56492665  | 56519292  | 26627     | 0.52          |
| 2                   | 56714792  | 57107909  | 393117    | 0.06          |
| 2                   | 74752363  | 74770617  | 18254     | 0.06          |
| 2                   | 74919394  | 74997740  | 78346     | 0.11          |
| 2                   | 76882001  | 76892220  | 10219     | 0.06          |

SUPPLEMENTARY INFORMATION

|   |           |           |        |      |
|---|-----------|-----------|--------|------|
| 2 | 97535697  | 97674747  | 139050 | 0.34 |
| 2 | 107211485 | 107246922 | 35437  | 0.11 |
| 2 | 123386803 | 123421929 | 35126  | 0.06 |
| 2 | 132000728 | 132297217 | 296489 | 7.34 |
| 2 | 141651040 | 141763897 | 112857 | 0.06 |
| 2 | 154772998 | 154793467 | 20469  | 0.06 |
| 2 | 156611609 | 156613750 | 2141   | 0.11 |
| 2 | 158277999 | 158326961 | 48962  | 0.06 |
| 2 | 162976516 | 162995345 | 18829  | 0.06 |
| 2 | 164493392 | 164499833 | 6441   | 0.06 |
| 2 | 168963314 | 168969675 | 6361   | 0.06 |
| 2 | 169696721 | 169700840 | 4119   | 0.11 |
| 2 | 173957922 | 173980139 | 22217  | 0.06 |
| 2 | 194844685 | 194873302 | 28617  | 0.06 |
| 2 | 203899887 | 203910307 | 10420  | 0.34 |
| 2 | 204736295 | 204762413 | 26118  | 0.06 |
| 2 | 206799531 | 206804338 | 4807   | 0.11 |
| 2 | 210463939 | 210493961 | 30022  | 0.06 |
| 2 | 221991853 | 222020580 | 28727  | 0.06 |
| 2 | 227376905 | 227394586 | 17681  | 2.01 |
| 2 | 227581134 | 227918547 | 337413 | 0.06 |
| 2 | 229765975 | 229865828 | 99853  | 0.06 |
| 2 | 236848561 | 236849614 | 1053   | 0.06 |
| 3 | 576158    | 1347433   | 771275 | 0.17 |
| 3 | 1779529   | 1798009   | 18480  | 0.11 |
| 3 | 2531309   | 2533022   | 1713   | 0.06 |
| 3 | 6277212   | 6300723   | 23511  | 0.52 |
| 3 | 8783940   | 8813413   | 29473  | 0.11 |
| 3 | 17692492  | 17721460  | 28968  | 0.23 |
| 3 | 21210675  | 21300928  | 90253  | 0.11 |
| 3 | 21937094  | 21952767  | 15673  | 0.11 |
| 3 | 30414431  | 30428535  | 14104  | 0.06 |
| 3 | 35127025  | 35137093  | 10068  | 0.06 |
| 3 | 35765313  | 35899951  | 134638 | 0.06 |
| 3 | 36089642  | 36103577  | 13935  | 0.06 |
| 3 | 48779292  | 48816040  | 36748  | 0.23 |
| 3 | 57977845  | 57992829  | 14984  | 0.06 |
| 3 | 63075679  | 63243596  | 167917 | 0.11 |
| 3 | 75370585  | 75891946  | 521361 | 5.96 |
| 3 | 95437291  | 95548133  | 110842 | 2.18 |
| 3 | 110393694 | 110402099 | 8405   | 0.06 |
| 3 | 121631600 | 121634407 | 2807   | 0.06 |
| 3 | 130722331 | 130730404 | 8073   | 0.11 |
| 3 | 136471843 | 136522088 | 50245  | 0.06 |
| 3 | 144363555 | 144369423 | 5868   | 0.06 |
| 3 | 146674130 | 147058474 | 384344 | 0.23 |

SUPPLEMENTARY INFORMATION

|   |           |           |        |      |
|---|-----------|-----------|--------|------|
| 3 | 148051270 | 148074957 | 23687  | 0.06 |
| 3 | 155761934 | 155787808 | 25874  | 0.34 |
| 3 | 164283490 | 164410087 | 126597 | 2.41 |
| 3 | 165542464 | 165618099 | 75635  | 0.69 |
| 3 | 167397263 | 167442503 | 45240  | 0.06 |
| 3 | 175008726 | 175020005 | 11279  | 0.06 |
| 3 | 177522405 | 177572673 | 50268  | 0.06 |
| 3 | 186827747 | 186940720 | 112973 | 0.06 |
| 3 | 186963419 | 186967199 | 3780   | 0.06 |
| 4 | 3041175   | 3068437   | 27262  | 0.17 |
| 4 | 11871409  | 11874497  | 3088   | 0.11 |
| 4 | 11909201  | 11925154  | 15953  | 0.06 |
| 4 | 16373541  | 16399452  | 25911  | 0.06 |
| 4 | 16615927  | 16626456  | 10529  | 0.06 |
| 4 | 25623528  | 25629772  | 6244   | 0.11 |
| 4 | 25844609  | 25923235  | 78626  | 0.06 |
| 4 | 27261988  | 27399723  | 137735 | 0.06 |
| 4 | 27418796  | 27471194  | 52398  | 0.06 |
| 4 | 27959911  | 27964883  | 4972   | 0.63 |
| 4 | 30568342  | 30610404  | 42062  | 0.06 |
| 4 | 31037291  | 31051910  | 14619  | 0.06 |
| 4 | 31791952  | 31895086  | 103134 | 1.38 |
| 4 | 35185290  | 35203790  | 18500  | 0.11 |
| 4 | 39496873  | 39514191  | 17318  | 0.23 |
| 4 | 40471342  | 40885974  | 414632 | 0.11 |
| 4 | 56197963  | 56205474  | 7511   | 0.06 |
| 4 | 57181361  | 57234479  | 53118  | 0.34 |
| 4 | 57865770  | 57883452  | 17682  | 0.06 |
| 4 | 58284430  | 58290372  | 5942   | 0.11 |
| 4 | 59627752  | 59643935  | 16183  | 0.06 |
| 4 | 60044718  | 60139651  | 94933  | 0.69 |
| 4 | 60197644  | 60221353  | 23709  | 0.23 |
| 4 | 60274324  | 60325984  | 51660  | 0.06 |
| 4 | 60365833  | 60390997  | 25164  | 0.06 |
| 4 | 64458635  | 64562461  | 103826 | 0.46 |
| 4 | 65733418  | 65764047  | 30629  | 0.06 |
| 4 | 68812961  | 68850046  | 37085  | 1.03 |
| 4 | 72758411  | 72764795  | 6384   | 0.11 |
| 4 | 79974477  | 79987274  | 12797  | 0.06 |
| 4 | 88262042  | 88311420  | 49378  | 0.06 |
| 4 | 97075057  | 97115868  | 40811  | 0.06 |
| 4 | 101731191 | 101750836 | 19645  | 0.34 |
| 4 | 115661574 | 115781230 | 119656 | 0.23 |
| 4 | 116393940 | 116461263 | 67323  | 0.06 |
| 4 | 117394404 | 117411847 | 17443  | 0.75 |
| 4 | 127927521 | 128124962 | 197441 | 0.52 |



SUPPLEMENTARY INFORMATION

|   |           |           |         |      |
|---|-----------|-----------|---------|------|
| 4 | 129078426 | 130419497 | 1341071 | 0.40 |
| 4 | 130774276 | 130820154 | 45878   | 0.34 |
| 4 | 135055091 | 135205415 | 150324  | 0.46 |
| 4 | 135420989 | 135550966 | 129977  | 0.52 |
| 4 | 136720244 | 136753019 | 32775   | 0.06 |
| 4 | 137013387 | 137024311 | 10924   | 0.11 |
| 4 | 137386276 | 137412504 | 26228   | 0.17 |
| 4 | 158302182 | 158499327 | 197145  | 0.06 |
| 4 | 161031076 | 161086234 | 55158   | 0.23 |
| 4 | 163762897 | 163805955 | 43058   | 0.11 |
| 4 | 167039754 | 167332969 | 293215  | 0.06 |
| 4 | 167988321 | 168010230 | 21909   | 0.06 |
| 4 | 171403183 | 171443288 | 40105   | 0.11 |
| 4 | 171807843 | 171818519 | 10676   | 0.06 |
| 4 | 172292112 | 172326505 | 34393   | 0.06 |
| 4 | 174696163 | 174724266 | 28103   | 1.43 |
| 4 | 176212850 | 176217893 | 5043    | 0.69 |
| 4 | 176712142 | 176733309 | 21167   | 0.06 |
| 4 | 178086144 | 178119263 | 33119   | 0.23 |
| 4 | 178174163 | 178184294 | 10131   | 0.06 |
| 4 | 180348095 | 180358015 | 9920    | 0.40 |
| 4 | 183498299 | 183512278 | 13979   | 0.06 |
| 4 | 189309576 | 189413352 | 103776  | 0.40 |
| 5 | 2080480   | 2091624   | 11144   | 0.11 |
| 5 | 10120128  | 10175050  | 54922   | 0.06 |
| 5 | 13791861  | 14184007  | 392146  | 0.23 |
| 5 | 18359864  | 18360974  | 1110    | 0.52 |
| 5 | 18996857  | 19012175  | 15318   | 0.06 |
| 5 | 24143856  | 24150242  | 6386    | 0.34 |
| 5 | 27712909  | 27727704  | 14795   | 0.06 |
| 5 | 32658732  | 32694836  | 36104   | 0.06 |
| 5 | 41873629  | 42118462  | 244833  | 0.11 |
| 5 | 79082720  | 79094089  | 11369   | 0.06 |
| 5 | 84790666  | 84803174  | 12508   | 1.43 |
| 5 | 95886431  | 95939597  | 53166   | 0.06 |
| 5 | 99862563  | 100002726 | 140163  | 0.06 |
| 5 | 100266063 | 100367400 | 101337  | 0.17 |
| 5 | 110123833 | 110151360 | 27527   | 0.06 |
| 5 | 118344592 | 118431649 | 87057   | 0.11 |
| 5 | 119203647 | 119225667 | 22020   | 0.06 |
| 5 | 120962846 | 121079439 | 116593  | 0.23 |
| 5 | 126163417 | 126171614 | 8197    | 0.06 |
| 5 | 130139143 | 130368109 | 228966  | 0.11 |
| 5 | 131176798 | 131201384 | 24586   | 0.40 |
| 5 | 141350643 | 141360493 | 9850    | 0.11 |
| 5 | 145300348 | 145333952 | 33604   | 0.29 |

SUPPLEMENTARY INFORMATION

|   |           |           |        |      |
|---|-----------|-----------|--------|------|
| 6 | 11574107  | 11577339  | 3232   | 0.06 |
| 6 | 19556284  | 19560023  | 3739   | 0.06 |
| 6 | 23799565  | 23803993  | 4428   | 0.11 |
| 6 | 29124213  | 29191852  | 67639  | 0.11 |
| 6 | 32253451  | 32257051  | 3600   | 0.23 |
| 6 | 32624423  | 32627111  | 2688   | 0.06 |
| 6 | 34213903  | 34265377  | 51474  | 1.66 |
| 6 | 48700193  | 48715904  | 15711  | 0.40 |
| 6 | 63293027  | 63314119  | 21092  | 0.06 |
| 6 | 67526541  | 67540959  | 14418  | 0.11 |
| 6 | 72302505  | 72312331  | 9826   | 0.06 |
| 6 | 73324884  | 73364162  | 39278  | 0.23 |
| 6 | 74696158  | 74729452  | 33294  | 0.06 |
| 6 | 83239302  | 83250620  | 11318  | 0.11 |
| 6 | 89146781  | 89165815  | 19034  | 0.17 |
| 6 | 93244935  | 93258133  | 13198  | 0.11 |
| 6 | 93292953  | 93301411  | 8458   | 0.06 |
| 6 | 95492640  | 95521115  | 28475  | 0.57 |
| 6 | 96921179  | 96929696  | 8517   | 0.06 |
| 6 | 98861181  | 99352825  | 491644 | 0.06 |
| 6 | 102118676 | 102155138 | 36462  | 0.06 |
| 6 | 103595583 | 103650272 | 54689  | 0.06 |
| 6 | 105176995 | 105192900 | 15905  | 0.06 |
| 6 | 110795516 | 111022191 | 226675 | 0.69 |
| 6 | 111113606 | 111335982 | 222376 | 0.11 |
| 6 | 117187918 | 117244290 | 56372  | 0.06 |
| 6 | 120624604 | 120662464 | 37860  | 0.17 |
| 6 | 121041290 | 121050457 | 9167   | 0.06 |
| 6 | 141988984 | 142010944 | 21960  | 0.29 |
| 6 | 149314865 | 149325172 | 10307  | 0.06 |
| 6 | 158688120 | 158706485 | 18365  | 0.06 |
| 6 | 165464769 | 165480063 | 15294  | 0.34 |
| 6 | 167198269 | 167268035 | 69766  | 0.23 |
| 6 | 167411159 | 167432533 | 21374  | 0.06 |
| 6 | 167933559 | 168197136 | 263577 | 0.92 |
| 6 | 168590686 | 168598990 | 8304   | 0.17 |
| 7 | 5049397   | 5072477   | 23080  | 0.63 |
| 7 | 9574931   | 9588021   | 13090  | 0.80 |
| 7 | 9859197   | 9928557   | 69360  | 0.06 |
| 7 | 13468915  | 13471981  | 3066   | 0.06 |
| 7 | 14686947  | 15579357  | 892410 | 0.40 |
| 7 | 20769922  | 20796794  | 26872  | 0.57 |
| 7 | 26042751  | 26091467  | 48716  | 0.06 |
| 7 | 26185559  | 26224658  | 39099  | 2.12 |
| 7 | 33092926  | 33147667  | 54741  | 0.06 |
| 7 | 37892348  | 37896928  | 4580   | 0.17 |

SUPPLEMENTARY INFORMATION

|   |           |           |        |      |
|---|-----------|-----------|--------|------|
| 7 | 41136432  | 41145303  | 8871   | 0.06 |
| 7 | 45761447  | 45957771  | 196324 | 0.06 |
| 7 | 47368291  | 47678915  | 310624 | 0.17 |
| 7 | 56419507  | 56505640  | 86133  | 0.11 |
| 7 | 56517704  | 56591620  | 73916  | 0.06 |
| 7 | 62744672  | 63252790  | 508118 | 3.33 |
| 7 | 64435731  | 64467431  | 31700  | 0.06 |
| 7 | 67349913  | 67404013  | 54100  | 0.06 |
| 7 | 77665185  | 77672742  | 7557   | 0.06 |
| 7 | 82875907  | 82903347  | 27440  | 0.11 |
| 7 | 89837368  | 89863026  | 25658  | 0.11 |
| 7 | 97748769  | 98123642  | 374873 | 0.06 |
| 7 | 123153128 | 123248429 | 95301  | 0.17 |
| 7 | 140510141 | 140533785 | 23644  | 0.11 |
| 7 | 148932499 | 148951045 | 18546  | 0.17 |
| 7 | 152842286 | 152868926 | 26640  | 0.06 |
| 8 | 8921818   | 8933070   | 11252  | 0.06 |
| 8 | 11890825  | 11895723  | 4898   | 0.06 |
| 8 | 15562268  | 15575144  | 12876  | 0.11 |
| 8 | 16734050  | 16737245  | 3195   | 0.06 |
| 8 | 22355111  | 22383225  | 28114  | 0.11 |
| 8 | 26476982  | 26486298  | 9316   | 0.06 |
| 8 | 57298249  | 57311794  | 13545  | 0.06 |
| 8 | 57363838  | 57760353  | 396515 | 0.06 |
| 8 | 60644018  | 60655651  | 11633  | 0.06 |
| 8 | 61794805  | 61811611  | 16806  | 0.06 |
| 8 | 66560409  | 66575362  | 14953  | 0.06 |
| 8 | 66580106  | 66659086  | 78980  | 0.06 |
| 8 | 74570724  | 74593900  | 23176  | 0.06 |
| 8 | 86187173  | 86322952  | 135779 | 0.06 |
| 8 | 89516616  | 89534750  | 18134  | 0.46 |
| 8 | 89600644  | 89705854  | 105210 | 0.06 |
| 8 | 102806069 | 102822395 | 16326  | 0.06 |
| 8 | 111618105 | 111631233 | 13128  | 0.06 |
| 8 | 111697665 | 111734593 | 36928  | 0.29 |
| 8 | 123247191 | 123377368 | 130177 | 0.11 |
| 8 | 131986197 | 132038653 | 52456  | 0.11 |
| 8 | 133064115 | 133078740 | 14625  | 0.06 |
| 9 | 20840839  | 20949160  | 108321 | 0.06 |
| 9 | 27194391  | 27293011  | 98620  | 0.17 |
| 9 | 28458251  | 28475534  | 17283  | 0.06 |
| 9 | 32716890  | 32728906  | 12016  | 0.06 |
| 9 | 71559826  | 71848520  | 288694 | 0.06 |
| 9 | 74908391  | 74930322  | 21931  | 0.06 |
| 9 | 81867074  | 81888033  | 20959  | 0.06 |
| 9 | 104041268 | 104051184 | 9916   | 0.11 |

SUPPLEMENTARY INFORMATION

|    |           |           |        |      |
|----|-----------|-----------|--------|------|
| 9  | 110157008 | 110175898 | 18890  | 0.11 |
| 9  | 113119384 | 113131637 | 12253  | 0.06 |
| 9  | 116762076 | 116771458 | 9382   | 0.40 |
| 10 | 5009340   | 5233115   | 223775 | 0.11 |
| 10 | 6635805   | 6796537   | 160732 | 0.11 |
| 10 | 7555151   | 7580143   | 24992  | 0.06 |
| 10 | 11651167  | 11664894  | 13727  | 0.11 |
| 10 | 11738325  | 11753602  | 15277  | 0.06 |
| 10 | 12500530  | 12509057  | 8527   | 0.46 |
| 10 | 16519909  | 16574606  | 54697  | 0.11 |
| 10 | 17581565  | 17595621  | 14056  | 0.17 |
| 10 | 20543783  | 20555017  | 11234  | 0.06 |
| 10 | 26581325  | 26620398  | 39073  | 0.11 |
| 10 | 29708817  | 29712504  | 3687   | 0.11 |
| 10 | 33566200  | 33576948  | 10748  | 0.06 |
| 10 | 42711252  | 42754262  | 43010  | 0.29 |
| 10 | 47293674  | 47306686  | 13012  | 0.06 |
| 10 | 52924457  | 52933583  | 9126   | 0.06 |
| 10 | 52947471  | 52954397  | 6926   | 0.06 |
| 10 | 58080923  | 58128237  | 47314  | 0.11 |
| 10 | 65125333  | 65145717  | 20384  | 0.80 |
| 10 | 68672593  | 68815771  | 143178 | 0.46 |
| 10 | 68888627  | 68937485  | 48858  | 0.11 |
| 10 | 71862744  | 71880676  | 17932  | 0.40 |
| 10 | 80028446  | 80035330  | 6884   | 0.06 |
| 10 | 81034435  | 81040988  | 6553   | 0.06 |
| 10 | 82650138  | 82671673  | 21535  | 0.11 |
| 10 | 89864235  | 89884669  | 20434  | 0.06 |
| 10 | 100578852 | 100639197 | 60345  | 0.11 |
| 10 | 101249045 | 101590420 | 341375 | 0.06 |
| 10 | 109230352 | 109282708 | 52356  | 0.11 |
| 10 | 112140240 | 112207986 | 67746  | 0.06 |
| 10 | 124357910 | 124360857 | 2947   | 0.29 |
| 11 | 1120324   | 1649253   | 528929 | 5.16 |
| 11 | 2044100   | 2082296   | 38196  | 1.26 |
| 11 | 30529700  | 30534390  | 4690   | 0.06 |
| 11 | 42947325  | 42951703  | 4378   | 0.11 |
| 11 | 50220667  | 50821348  | 600681 | 5.73 |
| 11 | 62213425  | 62236100  | 22675  | 0.11 |
| 11 | 62324795  | 62381373  | 56578  | 0.34 |
| 11 | 62414123  | 62420194  | 6071   | 0.06 |
| 11 | 65749835  | 65799248  | 49413  | 3.96 |
| 11 | 65816789  | 65969132  | 152343 | 3.73 |
| 11 | 66040897  | 66061986  | 21089  | 0.23 |
| 11 | 66149680  | 66179692  | 30012  | 0.06 |
| 11 | 83142361  | 83165228  | 22867  | 0.06 |

SUPPLEMENTARY INFORMATION

|    |           |           |        |      |
|----|-----------|-----------|--------|------|
| 11 | 86859657  | 86862268  | 2611   | 0.11 |
| 11 | 94731919  | 94750995  | 19076  | 0.06 |
| 11 | 104480071 | 104506228 | 26157  | 0.06 |
| 11 | 107853742 | 107991310 | 137568 | 0.11 |
| 11 | 113106744 | 113108781 | 2037   | 0.06 |
| 11 | 115686504 | 115698339 | 11835  | 0.06 |
| 11 | 116789734 | 116792069 | 2335   | 0.06 |
| 11 | 124250072 | 124265029 | 14957  | 0.06 |
| 11 | 127972782 | 128094435 | 121653 | 0.06 |
| 11 | 133011440 | 133062945 | 51505  | 0.06 |
| 11 | 134282136 | 134344486 | 62350  | 0.11 |
| 12 | 2655540   | 2663115   | 7575   | 0.06 |
| 12 | 5122424   | 5284947   | 162523 | 0.06 |
| 12 | 6197760   | 6200432   | 2672   | 0.06 |
| 12 | 7662594   | 7665848   | 3254   | 0.06 |
| 12 | 10201980  | 10229648  | 27668  | 0.34 |
| 12 | 11304779  | 11325747  | 20968  | 1.20 |
| 12 | 17809145  | 17813685  | 4540   | 0.06 |
| 12 | 19057828  | 19152454  | 94626  | 0.06 |
| 12 | 29053138  | 29073147  | 20009  | 0.17 |
| 12 | 40244221  | 40252906  | 8685   | 0.06 |
| 12 | 58095530  | 58107273  | 11743  | 0.06 |
| 12 | 82326322  | 82419747  | 93425  | 0.11 |
| 12 | 83007562  | 83022106  | 14544  | 0.17 |
| 12 | 107314677 | 107326421 | 11744  | 0.06 |
| 12 | 114635794 | 114644389 | 8595   | 0.06 |
| 12 | 120433074 | 120449267 | 16193  | 0.46 |
| 12 | 128083027 | 128087592 | 4565   | 0.06 |
| 12 | 129043684 | 129055401 | 11717  | 0.06 |
| 12 | 130163701 | 130184555 | 20854  | 0.06 |
| 13 | 19517919  | 19544083  | 26164  | 0.06 |
| 13 | 21104754  | 21113428  | 8674   | 0.11 |
| 13 | 21372282  | 21379825  | 7543   | 0.06 |
| 13 | 23051869  | 23064163  | 12294  | 0.06 |
| 13 | 27932143  | 27954398  | 22255  | 0.11 |
| 13 | 32916728  | 32925590  | 8862   | 0.06 |
| 13 | 35752646  | 35760164  | 7518   | 0.06 |
| 13 | 36263862  | 36283502  | 19640  | 0.06 |
| 13 | 36963500  | 36982862  | 19362  | 1.49 |
| 13 | 41027566  | 41039590  | 12024  | 0.06 |
| 13 | 42308484  | 42322287  | 13803  | 0.06 |
| 13 | 42859299  | 42939595  | 80296  | 0.06 |
| 13 | 48519097  | 48536525  | 17428  | 0.06 |
| 13 | 49396404  | 49399506  | 3102   | 0.06 |
| 13 | 49436063  | 49470845  | 34782  | 0.06 |
| 13 | 53137719  | 53162459  | 24740  | 0.06 |

SUPPLEMENTARY INFORMATION

|    |           |           |        |      |
|----|-----------|-----------|--------|------|
| 13 | 53964213  | 53981152  | 16939  | 0.06 |
| 13 | 62096640  | 62112385  | 15745  | 0.06 |
| 13 | 67068828  | 67231995  | 163167 | 0.06 |
| 13 | 79796487  | 79837790  | 41303  | 0.06 |
| 13 | 81369815  | 81385065  | 15250  | 0.06 |
| 13 | 85579573  | 85589662  | 10089  | 0.06 |
| 13 | 95972556  | 95991634  | 19078  | 0.06 |
| 13 | 96678843  | 96771510  | 92667  | 0.06 |
| 13 | 100039069 | 100057445 | 18376  | 0.06 |
| 13 | 102592905 | 102599717 | 6812   | 0.11 |
| 13 | 103032716 | 103049205 | 16489  | 0.11 |
| 13 | 107857699 | 107866791 | 9092   | 0.06 |
| 14 | 20013277  | 20436339  | 423062 | 0.57 |
| 14 | 20889996  | 20941547  | 51551  | 0.06 |
| 14 | 31517550  | 31521641  | 4091   | 0.06 |
| 14 | 34726588  | 34934766  | 208178 | 0.29 |
| 14 | 35741638  | 35823699  | 82061  | 0.23 |
| 14 | 44352777  | 44454516  | 101739 | 0.06 |
| 14 | 73304219  | 73318155  | 13936  | 0.06 |
| 14 | 77386513  | 77395013  | 8500   | 0.06 |
| 14 | 79803259  | 79999983  | 196724 | 0.06 |
| 14 | 82113991  | 82119980  | 5989   | 0.06 |
| 14 | 83004287  | 83036287  | 32000  | 0.06 |
| 14 | 91077949  | 91088564  | 10615  | 0.06 |
| 14 | 93851517  | 93867057  | 15540  | 0.17 |
| 14 | 95649237  | 95665238  | 16001  | 0.11 |
| 14 | 96987073  | 97344557  | 357484 | 0.06 |
| 14 | 97701638  | 97709130  | 7492   | 0.06 |
| 14 | 97732764  | 97743393  | 10629  | 0.06 |
| 14 | 99794334  | 99799894  | 5560   | 0.06 |
| 14 | 100132248 | 100256325 | 124077 | 2.70 |
| 14 | 100296166 | 100311456 | 15290  | 0.06 |
| 14 | 103693804 | 103729273 | 35469  | 0.75 |
| 15 | 31198520  | 31206286  | 7766   | 0.06 |
| 15 | 39918683  | 39920539  | 1856   | 0.97 |
| 15 | 51977299  | 52050905  | 73606  | 0.06 |
| 15 | 52713950  | 52733495  | 19545  | 0.06 |
| 15 | 57352069  | 57406764  | 54695  | 0.11 |
| 15 | 74606750  | 74636378  | 29628  | 0.57 |
| 15 | 75197756  | 75215477  | 17721  | 0.11 |
| 15 | 75326073  | 75417289  | 91216  | 0.11 |
| 15 | 76478144  | 76489014  | 10870  | 0.06 |
| 15 | 87127932  | 87149878  | 21946  | 0.23 |
| 15 | 100752379 | 100928864 | 176485 | 0.11 |
| 16 | 4091727   | 4097924   | 6197   | 0.06 |
| 16 | 8381113   | 8403035   | 21922  | 0.06 |

SUPPLEMENTARY INFORMATION

|    |          |          |        |      |
|----|----------|----------|--------|------|
| 16 | 49216487 | 49260741 | 44254  | 0.06 |
| 16 | 53491908 | 53523967 | 32059  | 0.52 |
| 16 | 57515403 | 57544765 | 29362  | 0.11 |
| 16 | 60100657 | 60104607 | 3950   | 0.06 |
| 16 | 63726650 | 63730250 | 3600   | 0.06 |
| 16 | 63765026 | 63785891 | 20865  | 0.06 |
| 16 | 72275691 | 72537611 | 261920 | 0.11 |
| 16 | 74847725 | 75002535 | 154810 | 0.06 |
| 16 | 79226868 | 79239785 | 12917  | 0.17 |
| 16 | 81800708 | 81808260 | 7552   | 0.69 |
| 16 | 83565248 | 83569140 | 3892   | 0.06 |
| 16 | 87375682 | 87411805 | 36123  | 1.38 |
| 16 | 89542941 | 89572729 | 29788  | 0.57 |
| 17 | 4884425  | 4908320  | 23895  | 0.86 |
| 17 | 8067861  | 8081468  | 13607  | 0.06 |
| 17 | 9528319  | 9534195  | 5876   | 0.06 |
| 17 | 14296292 | 14316169 | 19877  | 1.20 |
| 17 | 19752889 | 19757974 | 5085   | 0.06 |
| 17 | 39194210 | 39204540 | 10330  | 0.06 |
| 17 | 44404704 | 44494310 | 89606  | 0.06 |
| 17 | 45304010 | 45321252 | 17242  | 0.11 |
| 17 | 49675117 | 49708439 | 33322  | 0.06 |
| 17 | 58456803 | 58489749 | 32946  | 0.06 |
| 17 | 58505032 | 58542806 | 37774  | 0.34 |
| 17 | 61382833 | 61416963 | 34130  | 0.34 |
| 17 | 69153831 | 69170807 | 16976  | 0.06 |
| 17 | 70502506 | 70537986 | 35480  | 0.06 |
| 17 | 70551531 | 70570984 | 19453  | 0.06 |
| 17 | 77219021 | 77237877 | 18856  | 0.57 |
| 17 | 77552529 | 77658640 | 106111 | 0.06 |
| 17 | 78239710 | 78252585 | 12875  | 0.46 |
| 17 | 78577923 | 78601339 | 23416  | 0.17 |
| 17 | 79369266 | 79395063 | 25797  | 0.57 |
| 17 | 80630475 | 80642647 | 12172  | 0.23 |
| 18 | 820381   | 828428   | 8047   | 0.40 |
| 18 | 11244991 | 11588946 | 343955 | 0.17 |
| 18 | 12195107 | 12328985 | 133878 | 0.06 |
| 18 | 28280627 | 28302121 | 21494  | 0.06 |
| 18 | 31849736 | 31925797 | 76061  | 0.75 |
| 18 | 31939201 | 31947921 | 8720   | 0.06 |
| 18 | 41062075 | 41076217 | 14142  | 0.06 |
| 18 | 41277457 | 41283486 | 6029   | 0.06 |
| 18 | 49486464 | 49497269 | 10805  | 0.06 |
| 18 | 52303301 | 52314008 | 10707  | 0.06 |
| 18 | 57509248 | 57671992 | 162744 | 0.11 |
| 18 | 58579210 | 58778838 | 199628 | 0.11 |

SUPPLEMENTARY INFORMATION

|    |          |          |        |      |
|----|----------|----------|--------|------|
| 18 | 74440613 | 74479641 | 39028  | 0.06 |
| 18 | 78628305 | 78639959 | 11654  | 0.06 |
| 19 | 3328320  | 3335576  | 7256   | 0.06 |
| 19 | 3383395  | 3410259  | 26864  | 0.06 |
| 19 | 3479373  | 3703130  | 223757 | 4.59 |
| 19 | 3738651  | 3805890  | 67239  | 2.58 |
| 19 | 4780935  | 4818565  | 37630  | 0.29 |
| 19 | 6895855  | 7106549  | 210694 | 0.57 |
| 19 | 8493358  | 8529661  | 36303  | 1.55 |
| 19 | 11397501 | 11414796 | 17295  | 0.11 |
| 19 | 14391379 | 14427808 | 36429  | 0.80 |
| 19 | 14464147 | 14483799 | 19652  | 0.06 |
| 19 | 14495415 | 14542296 | 46881  | 0.86 |
| 19 | 14553016 | 14575034 | 22018  | 0.11 |
| 19 | 15667349 | 15727059 | 59710  | 4.19 |
| 19 | 17497707 | 17541587 | 43880  | 0.11 |
| 19 | 19375426 | 19409001 | 33575  | 0.11 |
| 19 | 19730943 | 19773382 | 42439  | 0.06 |
| 19 | 31343072 | 31355686 | 12614  | 0.06 |
| 19 | 32383819 | 32388358 | 4539   | 1.26 |
| 19 | 33275568 | 33281400 | 5832   | 0.06 |
| 19 | 33719877 | 33744316 | 24439  | 0.06 |
| 19 | 35601587 | 35657649 | 56062  | 0.92 |
| 19 | 35872568 | 35905132 | 32564  | 0.11 |
| 19 | 35996244 | 36010543 | 14299  | 0.11 |
| 19 | 36096969 | 36129876 | 32907  | 1.26 |
| 19 | 36504018 | 36537641 | 33623  | 0.17 |
| 19 | 36840712 | 36858366 | 17654  | 0.06 |
| 19 | 36898545 | 36922545 | 24000  | 0.06 |
| 19 | 37065771 | 37095148 | 29377  | 0.06 |
| 19 | 38206351 | 38226738 | 20387  | 0.17 |
| 19 | 38304947 | 38491143 | 186196 | 0.92 |
| 19 | 38827465 | 38913817 | 86352  | 0.57 |
| 19 | 40402976 | 40405580 | 2604   | 0.06 |
| 19 | 41155272 | 41194588 | 39316  | 0.06 |
| 19 | 48395295 | 48514469 | 119174 | 1.89 |
| 19 | 48708450 | 48729709 | 21259  | 0.11 |
| 19 | 48748517 | 48761108 | 12591  | 0.06 |
| 19 | 50475637 | 50514469 | 38832  | 0.11 |
| 19 | 50981734 | 50988343 | 6609   | 0.11 |
| 19 | 51081694 | 51130501 | 48807  | 0.63 |
| 19 | 52490367 | 52540022 | 49655  | 0.11 |
| 19 | 56660842 | 56671001 | 10159  | 0.06 |
| 20 | 571277   | 578790   | 7513   | 0.06 |
| 20 | 2560993  | 2563158  | 2165   | 0.06 |
| 20 | 3009168  | 3016469  | 7301   | 0.06 |



SUPPLEMENTARY INFORMATION

|                  |          |          |        |      |
|------------------|----------|----------|--------|------|
| 20               | 5946028  | 5958807  | 12779  | 0.06 |
| 20               | 7026059  | 7199049  | 172990 | 0.06 |
| 20               | 9733230  | 9767480  | 34250  | 0.06 |
| 20               | 23859357 | 23871343 | 11986  | 0.06 |
| 20               | 24436524 | 24443584 | 7060   | 0.06 |
| 20               | 24707683 | 24781454 | 73771  | 0.06 |
| 20               | 33412545 | 33423541 | 10996  | 0.06 |
| 20               | 40715632 | 40753880 | 38248  | 0.06 |
| 20               | 44965137 | 44996412 | 31275  | 0.06 |
| 20               | 60376492 | 60387400 | 10908  | 0.06 |
| 20               | 60992315 | 61014216 | 21901  | 1.49 |
| 20               | 63087338 | 63106936 | 19598  | 0.75 |
| 21               | 14245760 | 14288523 | 42763  | 0.06 |
| 21               | 41854544 | 41860297 | 5753   | 0.06 |
| 21               | 43832191 | 43863789 | 31598  | 0.29 |
| 21               | 45228126 | 45366638 | 138512 | 0.52 |
| 22               | 23014571 | 23022202 | 7631   | 0.17 |
| 22               | 23381534 | 23400522 | 18988  | 0.17 |
| 22               | 32410344 | 32449740 | 39396  | 0.06 |
| 22               | 33325334 | 33331783 | 6449   | 0.06 |
| 22               | 34464592 | 34495618 | 31026  | 0.06 |
| 22               | 42734392 | 42781650 | 47258  | 0.06 |
| 22               | 43383514 | 43388500 | 4986   | 0.06 |
| 22               | 44783504 | 44825700 | 42196  | 0.06 |
| 22               | 45098951 | 45104637 | 5686   | 0.06 |
| 22               | 45170586 | 45193936 | 23350  | 0.11 |
| 22               | 49077502 | 49081089 | 3587   | 0.11 |
| <hr/>            |          |          |        |      |
| <b>Deletions</b> |          |          |        |      |
| 1                | 1110158  | 1171304  | 61146  | 0.06 |
| 1                | 1275031  | 1606824  | 331793 | 0.92 |
| 1                | 1622382  | 1736859  | 114477 | 1.09 |
| 1                | 1916447  | 1947645  | 31198  | 0.17 |
| 1                | 2577613  | 2743008  | 165395 | 0.34 |
| 1                | 3060252  | 3066299  | 6047   | 0.06 |
| 1                | 3093405  | 3106763  | 13358  | 0.34 |
| 1                | 3413826  | 3427238  | 13412  | 0.06 |
| 1                | 4058927  | 4063057  | 4130   | 0.11 |
| 1                | 4969471  | 4995544  | 26073  | 0.06 |
| 1                | 5053851  | 5114018  | 60167  | 0.06 |
| 1                | 5294499  | 5298656  | 4157   | 0.11 |
| 1                | 5595707  | 5603031  | 7324   | 0.06 |
| 1                | 5973659  | 5981226  | 7567   | 0.06 |
| 1                | 6423523  | 6444559  | 21036  | 0.40 |
| 1                | 6464589  | 6475089  | 10500  | 0.17 |
| 1                | 6629764  | 6636785  | 7021   | 0.17 |
| 1                | 6939678  | 6942334  | 2656   | 0.06 |

SUPPLEMENTARY INFORMATION

|   |          |          |       |      |
|---|----------|----------|-------|------|
| 1 | 7117509  | 7128361  | 10852 | 0.11 |
| 1 | 7294057  | 7313767  | 19710 | 0.11 |
| 1 | 7444081  | 7458046  | 13965 | 0.11 |
| 1 | 7497092  | 7503841  | 6749  | 0.06 |
| 1 | 9346920  | 9352349  | 5429  | 0.11 |
| 1 | 9596879  | 9626134  | 29255 | 0.63 |
| 1 | 9782518  | 9795471  | 12953 | 0.63 |
| 1 | 11038275 | 11054028 | 15753 | 0.23 |
| 1 | 11661559 | 11674027 | 12468 | 0.06 |
| 1 | 12191261 | 12207407 | 16146 | 0.23 |
| 1 | 14864756 | 14866420 | 1664  | 0.06 |
| 1 | 15570525 | 15574806 | 4281  | 0.06 |
| 1 | 15595279 | 15605747 | 10468 | 0.23 |
| 1 | 15725847 | 15752981 | 27134 | 0.52 |
| 1 | 16186658 | 16191431 | 4773  | 0.06 |
| 1 | 16231647 | 16232908 | 1261  | 0.06 |
| 1 | 16977530 | 17013444 | 35914 | 0.29 |
| 1 | 17492083 | 17494864 | 2781  | 0.06 |
| 1 | 18250219 | 18275606 | 25387 | 0.17 |
| 1 | 18801641 | 18813343 | 11702 | 0.06 |
| 1 | 19342389 | 19344116 | 1727  | 0.06 |
| 1 | 19397585 | 19405379 | 7794  | 0.06 |
| 1 | 20295419 | 20299054 | 3635  | 0.06 |
| 1 | 21139102 | 21170218 | 31116 | 0.06 |
| 1 | 21535163 | 21541666 | 6503  | 0.11 |
| 1 | 21587361 | 21599655 | 12294 | 0.29 |
| 1 | 21632043 | 21633097 | 1054  | 0.06 |
| 1 | 22027617 | 22031562 | 3945  | 0.06 |
| 1 | 22173037 | 22183413 | 10376 | 1.32 |
| 1 | 23643640 | 23647541 | 3901  | 0.06 |
| 1 | 24058667 | 24060378 | 1711  | 0.06 |
| 1 | 28008170 | 28067150 | 58980 | 0.06 |
| 1 | 30007244 | 30015473 | 8229  | 0.17 |
| 1 | 30559046 | 30567587 | 8541  | 0.11 |
| 1 | 30803715 | 30806609 | 2894  | 0.11 |
| 1 | 31207466 | 31215111 | 7645  | 0.11 |
| 1 | 31689862 | 31696584 | 6722  | 0.06 |
| 1 | 33225076 | 33232248 | 7172  | 0.06 |
| 1 | 34237230 | 34249092 | 11862 | 0.06 |
| 1 | 34325265 | 34331747 | 6482  | 0.11 |
| 1 | 34451840 | 34456759 | 4919  | 0.11 |
| 1 | 34780696 | 34786068 | 5372  | 0.17 |
| 1 | 35163104 | 35173903 | 10799 | 0.06 |
| 1 | 38326229 | 38331771 | 5542  | 0.06 |
| 1 | 38456381 | 38461513 | 5132  | 0.06 |
| 1 | 39523340 | 39528131 | 4791  | 0.06 |

SUPPLEMENTARY INFORMATION

|   |          |          |        |      |
|---|----------|----------|--------|------|
| 1 | 39590285 | 39619228 | 28943  | 0.06 |
| 1 | 40270145 | 40405825 | 135680 | 0.34 |
| 1 | 42733444 | 42747828 | 14384  | 0.11 |
| 1 | 43994967 | 43999686 | 4719   | 0.17 |
| 1 | 44730872 | 44733738 | 2866   | 0.06 |
| 1 | 45778902 | 45782973 | 4071   | 0.06 |
| 1 | 47564055 | 47565491 | 1436   | 0.06 |
| 1 | 49243451 | 49304339 | 60888  | 0.06 |
| 1 | 51010270 | 51151493 | 141223 | 0.29 |
| 1 | 51170977 | 51198700 | 27723  | 0.06 |
| 1 | 51312913 | 51349807 | 36894  | 0.11 |
| 1 | 51898040 | 51918293 | 20253  | 0.17 |
| 1 | 52785243 | 52867444 | 82201  | 0.97 |
| 1 | 53779830 | 53806157 | 26327  | 0.06 |
| 1 | 54237914 | 54241938 | 4024   | 0.11 |
| 1 | 54291478 | 54293257 | 1779   | 0.06 |
| 1 | 54811757 | 54818385 | 6628   | 0.11 |
| 1 | 55101737 | 55106280 | 4543   | 0.06 |
| 1 | 55943205 | 55947904 | 4699   | 0.06 |
| 1 | 57447555 | 57449213 | 1658   | 0.06 |
| 1 | 58727216 | 58737449 | 10233  | 0.69 |
| 1 | 59578285 | 59581012 | 2727   | 0.11 |
| 1 | 61559613 | 61562731 | 3118   | 0.06 |
| 1 | 61939375 | 61990763 | 51388  | 1.15 |
| 1 | 62147311 | 62150211 | 2900   | 0.06 |
| 1 | 62300855 | 62303472 | 2617   | 0.06 |
| 1 | 66437680 | 66451277 | 13597  | 0.11 |
| 1 | 66879399 | 66902195 | 22796  | 0.34 |
| 1 | 70698032 | 70701995 | 3963   | 0.17 |
| 1 | 70779404 | 70780985 | 1581   | 0.06 |
| 1 | 70837818 | 70847638 | 9820   | 0.06 |
| 1 | 70949180 | 70999715 | 50535  | 0.11 |
| 1 | 72138644 | 72142975 | 4331   | 0.06 |
| 1 | 73998371 | 74000628 | 2257   | 0.06 |
| 1 | 75876281 | 75924101 | 47820  | 0.17 |
| 1 | 76398127 | 76401224 | 3097   | 0.11 |
| 1 | 77119801 | 77128889 | 9088   | 0.06 |
| 1 | 77307994 | 77315882 | 7888   | 0.69 |
| 1 | 78170655 | 78196099 | 25444  | 0.17 |
| 1 | 79617744 | 79693536 | 75792  | 0.11 |
| 1 | 79739774 | 79755294 | 15520  | 0.11 |
| 1 | 80866323 | 80877187 | 10864  | 0.06 |
| 1 | 85191787 | 85200435 | 8648   | 0.06 |
| 1 | 85540360 | 85543257 | 2897   | 0.06 |
| 1 | 86325278 | 86329156 | 3878   | 0.06 |
| 1 | 86562986 | 86573626 | 10640  | 0.11 |

SUPPLEMENTARY INFORMATION

|   |           |           |        |      |
|---|-----------|-----------|--------|------|
| 1 | 89406347  | 89420670  | 14323  | 0.06 |
| 1 | 90082050  | 90091422  | 9372   | 0.06 |
| 1 | 90441425  | 90454465  | 13040  | 0.40 |
| 1 | 90785174  | 90799531  | 14357  | 0.06 |
| 1 | 93123210  | 93138397  | 15187  | 0.06 |
| 1 | 93516968  | 93543504  | 26536  | 0.11 |
| 1 | 93989892  | 94005667  | 15775  | 0.06 |
| 1 | 100185108 | 100187311 | 2203   | 0.17 |
| 1 | 101543796 | 101556807 | 13011  | 0.11 |
| 1 | 101622813 | 101635734 | 12921  | 0.06 |
| 1 | 102022230 | 102027196 | 4966   | 0.11 |
| 1 | 102150487 | 102176695 | 26208  | 0.06 |
| 1 | 103612312 | 103668424 | 56112  | 1.32 |
| 1 | 103778424 | 103814778 | 36354  | 0.40 |
| 1 | 104417085 | 104435781 | 18696  | 0.06 |
| 1 | 104961901 | 104975030 | 13129  | 0.06 |
| 1 | 105764986 | 105774609 | 9623   | 1.20 |
| 1 | 107113734 | 107118984 | 5250   | 0.17 |
| 1 | 108102082 | 108115312 | 13230  | 0.06 |
| 1 | 110522948 | 110528657 | 5709   | 0.11 |
| 1 | 112758014 | 112759035 | 1021   | 0.06 |
| 1 | 112964556 | 112985309 | 20753  | 0.06 |
| 1 | 114287816 | 114294399 | 6583   | 0.06 |
| 1 | 114559503 | 114610193 | 50690  | 0.06 |
| 1 | 114850938 | 114954438 | 103500 | 0.06 |
| 1 | 115351066 | 115357742 | 6676   | 0.06 |
| 1 | 117572513 | 117581951 | 9438   | 0.11 |
| 1 | 119629919 | 119639892 | 9973   | 0.06 |
| 1 | 143272542 | 143284605 | 12063  | 0.06 |
| 1 | 147001352 | 147243554 | 242202 | 0.06 |
| 1 | 153321880 | 153324551 | 2671   | 0.06 |
| 1 | 153821908 | 153866569 | 44661  | 0.29 |
| 1 | 155051855 | 155063753 | 11898  | 0.06 |
| 1 | 155179729 | 155186056 | 6327   | 0.11 |
| 1 | 156366136 | 156367343 | 1207   | 0.06 |
| 1 | 156832865 | 156867624 | 34759  | 0.06 |
| 1 | 158523936 | 158527961 | 4025   | 0.11 |
| 1 | 158928732 | 158932486 | 3754   | 0.06 |
| 1 | 160834954 | 160837925 | 2971   | 0.06 |
| 1 | 161519677 | 161649951 | 130274 | 4.36 |
| 1 | 164143425 | 164148771 | 5346   | 0.06 |
| 1 | 164778171 | 164781379 | 3208   | 0.06 |
| 1 | 164967529 | 164975726 | 8197   | 0.06 |
| 1 | 165931994 | 165940619 | 8625   | 0.34 |
| 1 | 166496641 | 166499192 | 2551   | 0.17 |
| 1 | 166729898 | 166736387 | 6489   | 0.06 |

SUPPLEMENTARY INFORMATION

|   |           |           |        |      |
|---|-----------|-----------|--------|------|
| 1 | 166751662 | 166764782 | 13120  | 0.17 |
| 1 | 167053025 | 167062646 | 9621   | 0.17 |
| 1 | 168002785 | 168020293 | 17508  | 0.17 |
| 1 | 168045971 | 168063858 | 17887  | 0.06 |
| 1 | 169548890 | 169558232 | 9342   | 0.06 |
| 1 | 169934721 | 169974038 | 39317  | 0.11 |
| 1 | 170398412 | 170417993 | 19581  | 0.63 |
| 1 | 171812595 | 171819642 | 7047   | 0.06 |
| 1 | 172132939 | 172147658 | 14719  | 0.06 |
| 1 | 173106734 | 173118193 | 11459  | 0.11 |
| 1 | 174871961 | 174887622 | 15661  | 0.06 |
| 1 | 175881588 | 175884181 | 2593   | 0.06 |
| 1 | 179378546 | 179414971 | 36425  | 0.11 |
| 1 | 179986526 | 180044908 | 58382  | 0.34 |
| 1 | 180936158 | 180939925 | 3767   | 0.06 |
| 1 | 182115351 | 182118149 | 2798   | 0.11 |
| 1 | 184992503 | 185001245 | 8742   | 0.17 |
| 1 | 185065971 | 185073437 | 7466   | 0.06 |
| 1 | 185447125 | 185448984 | 1859   | 0.11 |
| 1 | 186689993 | 186707910 | 17917  | 0.06 |
| 1 | 186781174 | 186788209 | 7035   | 0.11 |
| 1 | 186815008 | 186819132 | 4124   | 0.11 |
| 1 | 187579227 | 187661054 | 81827  | 0.11 |
| 1 | 187672082 | 187813897 | 141815 | 0.17 |
| 1 | 189203553 | 189216195 | 12642  | 0.06 |
| 1 | 189414281 | 189466224 | 51943  | 0.40 |
| 1 | 190444895 | 190488210 | 43315  | 0.06 |
| 1 | 192231136 | 192245934 | 14798  | 0.17 |
| 1 | 193654681 | 193665521 | 10840  | 0.06 |
| 1 | 194330252 | 194339923 | 9671   | 0.46 |
| 1 | 195144854 | 195157599 | 12745  | 0.06 |
| 1 | 195853127 | 195857608 | 4481   | 0.06 |
| 1 | 195861608 | 195906930 | 45322  | 0.11 |
| 1 | 196753917 | 196949015 | 195098 | 2.75 |
| 1 | 196994083 | 197005726 | 11643  | 0.11 |
| 1 | 199524893 | 199527234 | 2341   | 0.06 |
| 1 | 200244430 | 200252163 | 7733   | 0.06 |
| 1 | 202008126 | 202017290 | 9164   | 0.06 |
| 1 | 203935438 | 203952747 | 17309  | 0.40 |
| 1 | 204001686 | 204006494 | 4808   | 0.17 |
| 1 | 205291838 | 205294176 | 2338   | 0.06 |
| 1 | 206009205 | 206024848 | 15643  | 0.29 |
| 1 | 206867593 | 206870398 | 2805   | 0.29 |
| 1 | 210162694 | 210170191 | 7497   | 0.06 |
| 1 | 210429364 | 210441720 | 12356  | 1.38 |
| 1 | 211051576 | 211056094 | 4518   | 0.06 |

SUPPLEMENTARY INFORMATION

|   |           |           |        |      |
|---|-----------|-----------|--------|------|
| 1 | 215204065 | 215217236 | 13171  | 0.06 |
| 1 | 215632217 | 215638288 | 6071   | 0.06 |
| 1 | 215684433 | 215688450 | 4017   | 0.11 |
| 1 | 219435234 | 219442274 | 7040   | 0.06 |
| 1 | 219718860 | 219723318 | 4458   | 0.23 |
| 1 | 219846955 | 219863296 | 16341  | 0.17 |
| 1 | 221550077 | 221646478 | 96401  | 0.06 |
| 1 | 224240559 | 224245465 | 4906   | 0.11 |
| 1 | 227258918 | 227295105 | 36187  | 0.23 |
| 1 | 227541523 | 227546189 | 4666   | 0.06 |
| 1 | 227729781 | 227734013 | 4232   | 0.06 |
| 1 | 227920883 | 227927608 | 6725   | 0.11 |
| 1 | 228265196 | 228287116 | 21920  | 0.34 |
| 1 | 228333272 | 228341428 | 8156   | 0.06 |
| 1 | 229042665 | 229048940 | 6275   | 0.06 |
| 1 | 229425427 | 229435823 | 10396  | 0.11 |
| 1 | 233173672 | 233270885 | 97213  | 0.06 |
| 1 | 235885621 | 235893517 | 7896   | 0.06 |
| 1 | 237281283 | 237292995 | 11712  | 0.06 |
| 1 | 239332589 | 239348499 | 15910  | 0.06 |
| 1 | 239364037 | 239368203 | 4166   | 0.11 |
| 1 | 240557416 | 240570126 | 12710  | 0.17 |
| 1 | 240675636 | 240679137 | 3501   | 0.06 |
| 1 | 242148962 | 242168650 | 19688  | 0.23 |
| 1 | 242863455 | 242889755 | 26300  | 0.06 |
| 1 | 243526130 | 243532300 | 6170   | 0.06 |
| 1 | 243801600 | 243835432 | 33832  | 0.06 |
| 1 | 243870703 | 243876706 | 6003   | 0.06 |
| 1 | 243895793 | 243898198 | 2405   | 0.11 |
| 1 | 245115505 | 245121590 | 6085   | 0.11 |
| 1 | 245171804 | 245174422 | 2618   | 0.06 |
| 1 | 245523501 | 245531430 | 7929   | 0.06 |
| 1 | 245704055 | 245705997 | 1942   | 0.06 |
| 1 | 245869685 | 245886945 | 17260  | 0.06 |
| 1 | 245933015 | 245937851 | 4836   | 0.06 |
| 1 | 246511474 | 246524284 | 12810  | 0.11 |
| 1 | 247113931 | 247120194 | 6263   | 0.06 |
| 1 | 247961134 | 247968086 | 6952   | 0.06 |
| 1 | 247988697 | 248052014 | 63317  | 0.06 |
| 1 | 248134229 | 248423931 | 289702 | 0.11 |
| 2 | 1490584   | 1521942   | 31358  | 0.40 |
| 2 | 1768191   | 1772021   | 3830   | 0.06 |
| 2 | 2245781   | 2254085   | 8304   | 0.06 |
| 2 | 4263430   | 4277582   | 14152  | 2.64 |
| 2 | 4447338   | 4455357   | 8019   | 0.06 |
| 2 | 6698995   | 6706983   | 7988   | 0.06 |

SUPPLEMENTARY INFORMATION

|   |          |          |        |      |
|---|----------|----------|--------|------|
| 2 | 8030032  | 8038092  | 8060   | 0.06 |
| 2 | 11667873 | 11668906 | 1033   | 0.06 |
| 2 | 13028107 | 13038338 | 10231  | 0.06 |
| 2 | 13063749 | 13069755 | 6006   | 0.06 |
| 2 | 13222805 | 13483232 | 260427 | 0.06 |
| 2 | 16245008 | 16253725 | 8717   | 0.06 |
| 2 | 16927367 | 17069465 | 142098 | 0.40 |
| 2 | 17990546 | 18012011 | 21465  | 0.11 |
| 2 | 19187033 | 19214748 | 27715  | 0.06 |
| 2 | 19376830 | 19382654 | 5824   | 0.06 |
| 2 | 19901462 | 19909300 | 7838   | 0.11 |
| 2 | 20209561 | 20213549 | 3988   | 0.29 |
| 2 | 21778103 | 21972801 | 194698 | 0.06 |
| 2 | 24870341 | 24883357 | 13016  | 0.06 |
| 2 | 27541603 | 27560221 | 18618  | 0.69 |
| 2 | 28169927 | 28175897 | 5970   | 0.06 |
| 2 | 28995030 | 29003693 | 8663   | 0.06 |
| 2 | 29312001 | 29322054 | 10053  | 0.06 |
| 2 | 29508922 | 29510935 | 2013   | 0.11 |
| 2 | 30395925 | 30403433 | 7508   | 0.23 |
| 2 | 30959296 | 30965022 | 5726   | 0.06 |
| 2 | 32069551 | 32218985 | 149434 | 0.69 |
| 2 | 32529919 | 32551696 | 21777  | 0.06 |
| 2 | 32575295 | 32613697 | 38402  | 0.06 |
| 2 | 33373150 | 33377504 | 4354   | 0.11 |
| 2 | 33647327 | 33659035 | 11708  | 0.06 |
| 2 | 34004838 | 34009275 | 4437   | 0.06 |
| 2 | 34592704 | 34684569 | 91865  | 0.17 |
| 2 | 34836144 | 34843217 | 7073   | 0.63 |
| 2 | 34871069 | 34876455 | 5386   | 0.06 |
| 2 | 35073345 | 35094222 | 20877  | 0.06 |
| 2 | 35162475 | 35174896 | 12421  | 0.11 |
| 2 | 35295108 | 35411515 | 116407 | 1.03 |
| 2 | 35569994 | 35576281 | 6287   | 0.06 |
| 2 | 35784777 | 35825818 | 41041  | 0.06 |
| 2 | 35954279 | 35961079 | 6800   | 0.17 |
| 2 | 36186946 | 36192396 | 5450   | 0.06 |
| 2 | 36199138 | 36216526 | 17388  | 0.06 |
| 2 | 36984820 | 36998563 | 13743  | 0.06 |
| 2 | 37847596 | 37850640 | 3044   | 0.06 |
| 2 | 38054621 | 38088540 | 33919  | 0.06 |
| 2 | 38158760 | 38166095 | 7335   | 0.06 |
| 2 | 39555186 | 39625632 | 70446  | 0.17 |
| 2 | 39975365 | 39982372 | 7007   | 0.06 |
| 2 | 40192989 | 40202969 | 9980   | 0.11 |
| 2 | 40471781 | 40483813 | 12032  | 0.06 |

SUPPLEMENTARY INFORMATION

|   |          |          |        |      |
|---|----------|----------|--------|------|
| 2 | 41128212 | 41146848 | 18636  | 0.11 |
| 2 | 41555200 | 41685107 | 129907 | 0.11 |
| 2 | 41715849 | 41778515 | 62666  | 0.06 |
| 2 | 42762452 | 42771804 | 9352   | 0.06 |
| 2 | 42889285 | 42893290 | 4005   | 0.06 |
| 2 | 42919660 | 42927070 | 7410   | 0.11 |
| 2 | 43300350 | 43307376 | 7026   | 0.06 |
| 2 | 43349204 | 43351911 | 2707   | 0.06 |
| 2 | 45104848 | 45136523 | 31675  | 0.06 |
| 2 | 45650229 | 45652166 | 1937   | 0.11 |
| 2 | 45817739 | 45820667 | 2928   | 0.06 |
| 2 | 47019760 | 47032358 | 12598  | 0.69 |
| 2 | 47287895 | 47296270 | 8375   | 0.06 |
| 2 | 47339963 | 47348474 | 8511   | 0.06 |
| 2 | 47817633 | 47859715 | 42082  | 0.40 |
| 2 | 48814183 | 48827884 | 13701  | 0.06 |
| 2 | 49415695 | 49480794 | 65099  | 0.06 |
| 2 | 50271467 | 50286636 | 15169  | 0.23 |
| 2 | 50679587 | 50852344 | 172757 | 0.11 |
| 2 | 51700780 | 51757206 | 56426  | 0.06 |
| 2 | 52774904 | 52831803 | 56899  | 0.17 |
| 2 | 52997838 | 52998995 | 1157   | 0.06 |
| 2 | 53118152 | 53134593 | 16441  | 0.06 |
| 2 | 53727113 | 53741637 | 14524  | 0.06 |
| 2 | 53797489 | 53837843 | 40354  | 0.06 |
| 2 | 54138692 | 54293217 | 154525 | 0.11 |
| 2 | 55285451 | 55371790 | 86339  | 0.52 |
| 2 | 55734424 | 55736283 | 1859   | 0.06 |
| 2 | 55768874 | 55771314 | 2440   | 0.06 |
| 2 | 55783471 | 55788114 | 4643   | 0.34 |
| 2 | 55844427 | 55849699 | 5272   | 0.17 |
| 2 | 57013142 | 57016078 | 2936   | 0.06 |
| 2 | 57175857 | 57248779 | 72922  | 1.55 |
| 2 | 57322316 | 57372378 | 50062  | 0.52 |
| 2 | 57593494 | 57625171 | 31677  | 0.17 |
| 2 | 58082239 | 58091263 | 9024   | 0.06 |
| 2 | 59721994 | 59725802 | 3808   | 0.17 |
| 2 | 59865651 | 59874077 | 8426   | 0.40 |
| 2 | 60717889 | 60730858 | 12969  | 0.06 |
| 2 | 60823058 | 60829881 | 6823   | 0.06 |
| 2 | 61079619 | 61096705 | 17086  | 0.06 |
| 2 | 61734294 | 61735846 | 1552   | 0.06 |
| 2 | 62508790 | 62531798 | 23008  | 0.06 |
| 2 | 64287849 | 64295173 | 7324   | 0.06 |
| 2 | 65735926 | 65755012 | 19086  | 0.06 |
| 2 | 67532940 | 67539817 | 6877   | 1.43 |



SUPPLEMENTARY INFORMATION

|   |           |           |        |      |
|---|-----------|-----------|--------|------|
| 2 | 70132213  | 70157862  | 25649  | 0.06 |
| 2 | 71486608  | 71488535  | 1927   | 0.06 |
| 2 | 75139501  | 75147139  | 7638   | 0.06 |
| 2 | 76365730  | 76394126  | 28396  | 0.06 |
| 2 | 76416141  | 76438908  | 22767  | 0.06 |
| 2 | 76710320  | 76721975  | 11655  | 0.11 |
| 2 | 77044128  | 77051347  | 7219   | 0.06 |
| 2 | 78053222  | 78071863  | 18641  | 0.11 |
| 2 | 78476432  | 78496536  | 20104  | 0.46 |
| 2 | 78599108  | 78648180  | 49072  | 0.11 |
| 2 | 78673143  | 78677228  | 4085   | 0.06 |
| 2 | 78913837  | 78923956  | 10119  | 0.06 |
| 2 | 79104957  | 79112779  | 7822   | 0.06 |
| 2 | 79135028  | 79148459  | 13431  | 0.34 |
| 2 | 79298917  | 79303938  | 5021   | 0.06 |
| 2 | 79833869  | 79839372  | 5503   | 0.06 |
| 2 | 80052740  | 80060550  | 7810   | 0.06 |
| 2 | 83020535  | 83025643  | 5108   | 0.06 |
| 2 | 83307746  | 83364729  | 56983  | 0.40 |
| 2 | 84963202  | 84965158  | 1956   | 0.29 |
| 2 | 85698557  | 85710877  | 12320  | 0.11 |
| 2 | 98241725  | 98269462  | 27737  | 0.57 |
| 2 | 100548429 | 100556794 | 8365   | 0.06 |
| 2 | 101649552 | 101671866 | 22314  | 0.06 |
| 2 | 105724357 | 105736650 | 12293  | 0.06 |
| 2 | 109497570 | 109529214 | 31644  | 0.23 |
| 2 | 110079565 | 110224953 | 145388 | 0.23 |
| 2 | 111028554 | 111032214 | 3660   | 0.06 |
| 2 | 111173844 | 111186961 | 13117  | 0.06 |
| 2 | 111932598 | 112048667 | 116069 | 0.11 |
| 2 | 112295484 | 112340863 | 45379  | 1.15 |
| 2 | 114324147 | 114388747 | 64600  | 0.11 |
| 2 | 115009881 | 115031811 | 21930  | 0.06 |
| 2 | 115938858 | 115972645 | 33787  | 0.11 |
| 2 | 118675643 | 118678127 | 2484   | 0.29 |
| 2 | 120919779 | 120924640 | 4861   | 0.06 |
| 2 | 121043177 | 121050200 | 7023   | 0.06 |
| 2 | 121110331 | 121114826 | 4495   | 0.06 |
| 2 | 121317246 | 121323934 | 6688   | 0.06 |
| 2 | 122019635 | 122041141 | 21506  | 0.06 |
| 2 | 122290358 | 122296333 | 5975   | 0.06 |
| 2 | 122842842 | 122851976 | 9134   | 0.06 |
| 2 | 123545171 | 123549188 | 4017   | 0.06 |
| 2 | 124055641 | 124058530 | 2889   | 0.06 |
| 2 | 124496293 | 124499348 | 3055   | 0.06 |
| 2 | 125372681 | 125378695 | 6014   | 0.06 |

SUPPLEMENTARY INFORMATION

|   |           |           |        |      |
|---|-----------|-----------|--------|------|
| 2 | 125861332 | 125910808 | 49476  | 1.20 |
| 2 | 126703219 | 126708072 | 4853   | 0.06 |
| 2 | 127084807 | 127086143 | 1336   | 0.06 |
| 2 | 127203694 | 127205692 | 1998   | 0.06 |
| 2 | 127346138 | 127352644 | 6506   | 0.06 |
| 2 | 127794853 | 127797562 | 2709   | 1.26 |
| 2 | 128261966 | 128293335 | 31369  | 0.23 |
| 2 | 128359348 | 128389632 | 30284  | 0.34 |
| 2 | 129240870 | 129253957 | 13087  | 0.06 |
| 2 | 129439035 | 129441794 | 2759   | 0.17 |
| 2 | 130915650 | 130931210 | 15560  | 0.06 |
| 2 | 131554102 | 131572603 | 18501  | 0.17 |
| 2 | 132852784 | 132977500 | 124716 | 0.06 |
| 2 | 133877623 | 133900277 | 22654  | 0.06 |
| 2 | 134986023 | 134988995 | 2972   | 0.11 |
| 2 | 135194835 | 135246359 | 51524  | 0.23 |
| 2 | 135277266 | 135327091 | 49825  | 0.23 |
| 2 | 135491143 | 135507061 | 15918  | 0.06 |
| 2 | 135794618 | 135827309 | 32691  | 0.06 |
| 2 | 135903649 | 135934255 | 30606  | 0.23 |
| 2 | 136038449 | 136042684 | 4235   | 0.06 |
| 2 | 137014197 | 137026022 | 11825  | 0.11 |
| 2 | 137199083 | 137206047 | 6964   | 0.06 |
| 2 | 139038548 | 139049328 | 10780  | 0.11 |
| 2 | 139438950 | 139450933 | 11983  | 0.17 |
| 2 | 139802256 | 139806048 | 3792   | 0.06 |
| 2 | 141397190 | 141406720 | 9530   | 0.06 |
| 2 | 145337502 | 145362943 | 25441  | 0.06 |
| 2 | 147272776 | 147304669 | 31893  | 0.06 |
| 2 | 147737716 | 147743405 | 5689   | 0.06 |
| 2 | 148251936 | 148259243 | 7307   | 0.11 |
| 2 | 148408754 | 148412896 | 4142   | 0.06 |
| 2 | 149510891 | 149544289 | 33398  | 0.06 |
| 2 | 151275616 | 151282757 | 7141   | 0.06 |
| 2 | 151379825 | 151450921 | 71096  | 0.06 |
| 2 | 153833707 | 153835985 | 2278   | 0.34 |
| 2 | 154728379 | 154735898 | 7519   | 0.06 |
| 2 | 155499688 | 155528834 | 29146  | 0.11 |
| 2 | 155551971 | 155563528 | 11557  | 0.06 |
| 2 | 158116904 | 158121813 | 4909   | 0.52 |
| 2 | 158307390 | 158414794 | 107404 | 0.06 |
| 2 | 159046537 | 159053899 | 7362   | 0.06 |
| 2 | 160121183 | 160129411 | 8228   | 0.06 |
| 2 | 163582547 | 163588672 | 6125   | 1.43 |
| 2 | 164759961 | 164790831 | 30870  | 0.11 |
| 2 | 166731755 | 166734263 | 2508   | 0.11 |

SUPPLEMENTARY INFORMATION

|   |           |           |        |      |
|---|-----------|-----------|--------|------|
| 2 | 167088838 | 167092628 | 3790   | 0.23 |
| 2 | 168277286 | 168287738 | 10452  | 0.23 |
| 2 | 168966776 | 168980220 | 13444  | 0.34 |
| 2 | 169598697 | 169607041 | 8344   | 0.23 |
| 2 | 170473853 | 170478348 | 4495   | 0.06 |
| 2 | 170549561 | 170552759 | 3198   | 0.06 |
| 2 | 172238412 | 172245247 | 6835   | 0.06 |
| 2 | 173429489 | 173433007 | 3518   | 0.06 |
| 2 | 173828460 | 173834208 | 5748   | 0.06 |
| 2 | 174280106 | 174286198 | 6092   | 0.06 |
| 2 | 175767187 | 175771473 | 4286   | 0.06 |
| 2 | 176509328 | 176512639 | 3311   | 0.69 |
| 2 | 178632298 | 178670552 | 38254  | 0.06 |
| 2 | 179635867 | 179637629 | 1762   | 0.06 |
| 2 | 179810942 | 179835970 | 25028  | 0.06 |
| 2 | 182722555 | 182757820 | 35265  | 0.17 |
| 2 | 183580266 | 183643772 | 63506  | 0.06 |
| 2 | 183798045 | 184036734 | 238689 | 2.87 |
| 2 | 184123053 | 184126290 | 3237   | 0.06 |
| 2 | 184174332 | 184270717 | 96385  | 1.78 |
| 2 | 185331576 | 185341365 | 9789   | 0.06 |
| 2 | 187075283 | 187105206 | 29923  | 0.06 |
| 2 | 187330200 | 187343989 | 13789  | 0.06 |
| 2 | 187775849 | 187777595 | 1746   | 0.17 |
| 2 | 189783193 | 189784669 | 1476   | 0.06 |
| 2 | 189957482 | 189966952 | 9470   | 0.06 |
| 2 | 192009533 | 192012520 | 2987   | 0.06 |
| 2 | 192411285 | 192420369 | 9084   | 0.69 |
| 2 | 194795354 | 194813153 | 17799  | 0.06 |
| 2 | 195774599 | 195782815 | 8216   | 0.11 |
| 2 | 197747609 | 197785181 | 37572  | 0.63 |
| 2 | 200751667 | 200805220 | 53553  | 0.06 |
| 2 | 200920934 | 200934696 | 13762  | 0.23 |
| 2 | 202875062 | 202980578 | 105516 | 0.46 |
| 2 | 204740447 | 204745132 | 4685   | 0.06 |
| 2 | 206996787 | 207000187 | 3400   | 0.06 |
| 2 | 208069842 | 208086648 | 16806  | 0.92 |
| 2 | 208371237 | 208381725 | 10488  | 0.40 |
| 2 | 208776550 | 208784068 | 7518   | 0.06 |
| 2 | 208822617 | 208849604 | 26987  | 0.06 |
| 2 | 209032828 | 209037065 | 4237   | 0.06 |
| 2 | 209604483 | 209627500 | 23017  | 0.11 |
| 2 | 209858018 | 210002084 | 144066 | 0.06 |
| 2 | 210905997 | 210913548 | 7551   | 0.29 |
| 2 | 211790092 | 211797374 | 7282   | 0.06 |
| 2 | 211938040 | 211943584 | 5544   | 0.11 |

SUPPLEMENTARY INFORMATION

|   |           |           |       |      |
|---|-----------|-----------|-------|------|
| 2 | 212174751 | 212176608 | 1857  | 0.06 |
| 2 | 212182615 | 212209010 | 26395 | 0.11 |
| 2 | 213710404 | 213716400 | 5996  | 0.11 |
| 2 | 213734481 | 213752856 | 18375 | 0.06 |
| 2 | 214137345 | 214149800 | 12455 | 0.06 |
| 2 | 217008807 | 217010795 | 1988  | 0.11 |
| 2 | 217392920 | 217396646 | 3726  | 1.32 |
| 2 | 219365406 | 219376828 | 11422 | 0.06 |
| 2 | 221200528 | 221208781 | 8253  | 0.06 |
| 2 | 221382209 | 221389570 | 7361  | 0.17 |
| 2 | 221991853 | 222000831 | 8978  | 0.06 |
| 2 | 222142370 | 222145464 | 3094  | 0.06 |
| 2 | 222534062 | 222539963 | 5901  | 0.06 |
| 2 | 222761309 | 222773184 | 11875 | 0.29 |
| 2 | 225590902 | 225595624 | 4722  | 0.06 |
| 2 | 225917548 | 225919064 | 1516  | 0.06 |
| 2 | 226480649 | 226482737 | 2088  | 0.75 |
| 2 | 226901684 | 226943609 | 41925 | 0.06 |
| 2 | 227595968 | 227601271 | 5303  | 0.06 |
| 2 | 227658238 | 227659691 | 1453  | 0.11 |
| 2 | 227740475 | 227748553 | 8078  | 0.17 |
| 2 | 230330332 | 230359923 | 29591 | 0.06 |
| 2 | 232761878 | 232767430 | 5552  | 0.11 |
| 2 | 233222032 | 233228150 | 6118  | 0.11 |
| 2 | 233469518 | 233471537 | 2019  | 0.34 |
| 2 | 233793040 | 233809023 | 15983 | 0.23 |
| 2 | 234024915 | 234047011 | 22096 | 0.29 |
| 2 | 234655499 | 234663275 | 7776  | 0.06 |
| 2 | 236073414 | 236076748 | 3334  | 0.06 |
| 2 | 238533360 | 238537442 | 4082  | 0.06 |
| 2 | 238910646 | 238912828 | 2182  | 0.06 |
| 2 | 240265192 | 240271928 | 6736  | 0.29 |
| 2 | 240888617 | 240933763 | 45146 | 0.57 |
| 2 | 241003836 | 241007705 | 3869  | 0.06 |
| 2 | 241186277 | 241203684 | 17407 | 0.11 |
| 3 | 783581    | 790906    | 7325  | 0.06 |
| 3 | 856978    | 861485    | 4507  | 0.06 |
| 3 | 956829    | 964745    | 7916  | 0.34 |
| 3 | 1417834   | 1422665   | 4831  | 0.06 |
| 3 | 1626248   | 1641470   | 15222 | 0.11 |
| 3 | 1662989   | 1670726   | 7737  | 0.17 |
| 3 | 3547248   | 3551915   | 4667  | 0.06 |
| 3 | 3725502   | 3735448   | 9946  | 0.06 |
| 3 | 4542969   | 4551438   | 8469  | 0.06 |
| 3 | 5368137   | 5378490   | 10353 | 0.06 |
| 3 | 5385605   | 5411021   | 25416 | 0.11 |

SUPPLEMENTARY INFORMATION

|   |          |          |       |      |
|---|----------|----------|-------|------|
| 3 | 6036962  | 6059253  | 22291 | 0.34 |
| 3 | 6586069  | 6594282  | 8213  | 0.06 |
| 3 | 6607961  | 6677308  | 69347 | 0.06 |
| 3 | 6909768  | 6913684  | 3916  | 0.06 |
| 3 | 7930973  | 7949976  | 19003 | 0.06 |
| 3 | 9065174  | 9069025  | 3851  | 0.06 |
| 3 | 9131261  | 9133167  | 1906  | 0.29 |
| 3 | 9321411  | 9325935  | 4524  | 0.11 |
| 3 | 9593787  | 9631334  | 37547 | 0.34 |
| 3 | 10131808 | 10134889 | 3081  | 0.11 |
| 3 | 10198225 | 10200559 | 2334  | 0.06 |
| 3 | 10724944 | 10735947 | 11003 | 0.17 |
| 3 | 11185647 | 11191093 | 5446  | 0.06 |
| 3 | 11910141 | 11913634 | 3493  | 0.06 |
| 3 | 12360975 | 12369203 | 8228  | 0.06 |
| 3 | 12608077 | 12621734 | 13657 | 0.06 |
| 3 | 13702560 | 13714384 | 11824 | 0.11 |
| 3 | 14249629 | 14252672 | 3043  | 0.11 |
| 3 | 15296693 | 15302747 | 6054  | 0.11 |
| 3 | 16586082 | 16614824 | 28742 | 0.29 |
| 3 | 20949247 | 20954543 | 5296  | 0.29 |
| 3 | 22039274 | 22050563 | 11289 | 0.06 |
| 3 | 22257173 | 22261581 | 4408  | 0.06 |
| 3 | 22390535 | 22462409 | 71874 | 0.06 |
| 3 | 23594145 | 23603962 | 9817  | 0.06 |
| 3 | 24728009 | 24758050 | 30041 | 0.23 |
| 3 | 24850914 | 24866377 | 15463 | 0.06 |
| 3 | 25034833 | 25040366 | 5533  | 0.06 |
| 3 | 25476981 | 25480212 | 3231  | 0.06 |
| 3 | 25907809 | 25923756 | 15947 | 0.17 |
| 3 | 26188876 | 26267563 | 78687 | 0.06 |
| 3 | 27771171 | 27776465 | 5294  | 0.11 |
| 3 | 27795987 | 27800796 | 4809  | 0.06 |
| 3 | 28769097 | 28777632 | 8535  | 0.52 |
| 3 | 29177405 | 29183409 | 6004  | 0.06 |
| 3 | 29909894 | 29914416 | 4522  | 0.11 |
| 3 | 30414431 | 30428535 | 14104 | 0.06 |
| 3 | 30868982 | 30872545 | 3563  | 0.75 |
| 3 | 32456596 | 32458456 | 1860  | 0.06 |
| 3 | 33275728 | 33306037 | 30309 | 0.06 |
| 3 | 33779310 | 33784319 | 5009  | 0.06 |
| 3 | 34687261 | 34757912 | 70651 | 0.23 |
| 3 | 35358899 | 35372656 | 13757 | 0.06 |
| 3 | 36002719 | 36005882 | 3163  | 0.06 |
| 3 | 36024552 | 36025686 | 1134  | 0.06 |
| 3 | 36358551 | 36375195 | 16644 | 0.11 |

SUPPLEMENTARY INFORMATION

|   |          |          |        |      |
|---|----------|----------|--------|------|
| 3 | 36387326 | 36417762 | 30436  | 0.11 |
| 3 | 38096133 | 38126634 | 30501  | 0.29 |
| 3 | 38575635 | 38588323 | 12688  | 0.06 |
| 3 | 39183299 | 39189506 | 6207   | 0.46 |
| 3 | 39313948 | 39356535 | 42587  | 0.06 |
| 3 | 39540301 | 39548800 | 8499   | 0.17 |
| 3 | 39693421 | 39755235 | 61814  | 0.17 |
| 3 | 40396235 | 40400417 | 4182   | 0.06 |
| 3 | 41051056 | 41101296 | 50240  | 0.06 |
| 3 | 45096854 | 45098015 | 1161   | 0.11 |
| 3 | 45592947 | 45597960 | 5013   | 0.06 |
| 3 | 46368545 | 46378613 | 10068  | 0.11 |
| 3 | 46406413 | 46408806 | 2393   | 0.06 |
| 3 | 48517813 | 48527685 | 9872   | 0.06 |
| 3 | 48795824 | 48853842 | 58018  | 0.23 |
| 3 | 49052843 | 49078387 | 25544  | 0.06 |
| 3 | 49199961 | 49238644 | 38683  | 0.06 |
| 3 | 49643540 | 49671149 | 27609  | 0.23 |
| 3 | 50691566 | 50775465 | 83899  | 0.23 |
| 3 | 50936609 | 50947823 | 11214  | 0.06 |
| 3 | 52034720 | 52054635 | 19915  | 0.11 |
| 3 | 53949727 | 53954905 | 5178   | 0.06 |
| 3 | 54225686 | 54233814 | 8128   | 0.06 |
| 3 | 57204489 | 57210880 | 6391   | 0.06 |
| 3 | 57594600 | 57664278 | 69678  | 0.06 |
| 3 | 60119602 | 60470175 | 350573 | 0.23 |
| 3 | 60816850 | 60823544 | 6694   | 0.11 |
| 3 | 62679547 | 62708646 | 29099  | 0.34 |
| 3 | 63142628 | 63153064 | 10436  | 0.80 |
| 3 | 63710616 | 63733152 | 22536  | 0.06 |
| 3 | 65243680 | 65248876 | 5196   | 0.06 |
| 3 | 65456392 | 65466500 | 10108  | 0.06 |
| 3 | 66941950 | 66947130 | 5180   | 0.06 |
| 3 | 66980228 | 66987517 | 7289   | 0.06 |
| 3 | 67609725 | 67615621 | 5896   | 0.06 |
| 3 | 68803595 | 68809588 | 5993   | 0.06 |
| 3 | 69014785 | 69044447 | 29662  | 0.11 |
| 3 | 72837424 | 72843210 | 5786   | 0.06 |
| 3 | 74480075 | 74485938 | 5863   | 0.06 |
| 3 | 75666750 | 75685682 | 18932  | 0.17 |
| 3 | 76206829 | 77025877 | 819048 | 0.23 |
| 3 | 77898557 | 77920814 | 22257  | 0.06 |
| 3 | 78865951 | 78901778 | 35827  | 0.06 |
| 3 | 79285456 | 79291571 | 6115   | 0.06 |
| 3 | 80329517 | 80336640 | 7123   | 0.06 |
| 3 | 83625305 | 83633236 | 7931   | 0.06 |

SUPPLEMENTARY INFORMATION

|   |           |           |        |      |
|---|-----------|-----------|--------|------|
| 3 | 84460374  | 84520244  | 59870  | 0.23 |
| 3 | 84779958  | 84808776  | 28818  | 0.06 |
| 3 | 94805942  | 94814769  | 8827   | 0.06 |
| 3 | 96347328  | 96350171  | 2843   | 0.06 |
| 3 | 96500117  | 96511216  | 11099  | 0.06 |
| 3 | 98134315  | 98167403  | 33088  | 0.06 |
| 3 | 98180562  | 98190822  | 10260  | 0.06 |
| 3 | 98393807  | 98403400  | 9593   | 0.23 |
| 3 | 103227372 | 103231851 | 4479   | 0.17 |
| 3 | 103309291 | 103313495 | 4204   | 0.06 |
| 3 | 103801514 | 104210570 | 409056 | 0.69 |
| 3 | 106500281 | 106515006 | 14725  | 1.61 |
| 3 | 109675987 | 109703091 | 27104  | 0.06 |
| 3 | 110205386 | 110221729 | 16343  | 0.06 |
| 3 | 110538126 | 110571996 | 33870  | 0.40 |
| 3 | 111893344 | 111900324 | 6980   | 0.06 |
| 3 | 113073418 | 113086339 | 12921  | 0.06 |
| 3 | 118054625 | 118058212 | 3587   | 0.17 |
| 3 | 118229805 | 118239552 | 9747   | 0.06 |
| 3 | 121622536 | 121637521 | 14985  | 0.06 |
| 3 | 124722390 | 124730444 | 8054   | 0.06 |
| 3 | 124796467 | 124803356 | 6889   | 0.06 |
| 3 | 125532112 | 125593286 | 61174  | 0.06 |
| 3 | 126146923 | 126156736 | 9813   | 0.11 |
| 3 | 126212760 | 126237733 | 24973  | 0.11 |
| 3 | 126508342 | 126520083 | 11741  | 0.06 |
| 3 | 127697630 | 127702643 | 5013   | 0.06 |
| 3 | 128944316 | 128946170 | 1854   | 0.06 |
| 3 | 130240625 | 130253047 | 12422  | 0.06 |
| 3 | 131969668 | 131988000 | 18332  | 0.06 |
| 3 | 132555669 | 132558523 | 2854   | 0.06 |
| 3 | 132577576 | 133273326 | 695750 | 0.23 |
| 3 | 133297470 | 133304724 | 7254   | 0.29 |
| 3 | 135124398 | 135125537 | 1139   | 0.11 |
| 3 | 136231248 | 136237797 | 6549   | 0.11 |
| 3 | 136354321 | 136512833 | 158512 | 0.29 |
| 3 | 137420294 | 137430107 | 9813   | 0.11 |
| 3 | 138708211 | 138780640 | 72429  | 0.23 |
| 3 | 138841359 | 138906711 | 65352  | 0.06 |
| 3 | 141622158 | 141626891 | 4733   | 0.11 |
| 3 | 141976426 | 142027242 | 50816  | 0.63 |
| 3 | 142311077 | 142391976 | 80899  | 0.11 |
| 3 | 143446660 | 143448480 | 1820   | 0.06 |
| 3 | 143526166 | 143536439 | 10273  | 0.06 |
| 3 | 144433380 | 144463191 | 29811  | 0.06 |
| 3 | 144563957 | 144576198 | 12241  | 0.80 |

SUPPLEMENTARY INFORMATION

|   |           |           |        |      |
|---|-----------|-----------|--------|------|
| 3 | 145755495 | 145767228 | 11733  | 0.06 |
| 3 | 145911296 | 145944666 | 33370  | 0.17 |
| 3 | 146572295 | 146586682 | 14387  | 0.06 |
| 3 | 148807150 | 148815610 | 8460   | 0.06 |
| 3 | 151021288 | 151025736 | 4448   | 0.40 |
| 3 | 152053357 | 152058190 | 4833   | 0.11 |
| 3 | 152696295 | 152699435 | 3140   | 0.17 |
| 3 | 153101712 | 153141427 | 39715  | 0.06 |
| 3 | 153748607 | 153752474 | 3867   | 0.63 |
| 3 | 154573689 | 154728118 | 154429 | 0.23 |
| 3 | 155986074 | 155990743 | 4669   | 0.06 |
| 3 | 156162266 | 156171187 | 8921   | 0.06 |
| 3 | 159075161 | 159095191 | 20030  | 1.72 |
| 3 | 160962985 | 160968000 | 5015   | 0.63 |
| 3 | 163525018 | 163540186 | 15168  | 0.06 |
| 3 | 164584512 | 164593341 | 8829   | 0.46 |
| 3 | 164806471 | 164831106 | 24635  | 0.23 |
| 3 | 165491049 | 165501356 | 10307  | 0.06 |
| 3 | 165803043 | 165831591 | 28548  | 0.06 |
| 3 | 165865082 | 165868486 | 3404   | 0.06 |
| 3 | 166071491 | 166087515 | 16024  | 0.17 |
| 3 | 172505419 | 172508450 | 3031   | 0.06 |
| 3 | 172869947 | 172874521 | 4574   | 0.06 |
| 3 | 173461508 | 173463651 | 2143   | 0.06 |
| 3 | 174385597 | 174391348 | 5751   | 0.06 |
| 3 | 175257462 | 175287164 | 29702  | 0.11 |
| 3 | 175596580 | 175601112 | 4532   | 0.06 |
| 3 | 176169594 | 176189554 | 19960  | 0.92 |
| 3 | 177230472 | 177237552 | 7080   | 0.06 |
| 3 | 178387427 | 178403079 | 15652  | 0.11 |
| 3 | 179154567 | 179185476 | 30909  | 0.06 |
| 3 | 181971859 | 181993485 | 21626  | 0.06 |
| 3 | 182464458 | 182478805 | 14347  | 0.06 |
| 3 | 183579399 | 183583986 | 4587   | 0.11 |
| 3 | 183637058 | 183691779 | 54721  | 0.17 |
| 3 | 183902898 | 183906222 | 3324   | 0.06 |
| 3 | 183910797 | 183917700 | 6903   | 0.06 |
| 3 | 184051895 | 184054726 | 2831   | 0.06 |
| 3 | 184088267 | 184093444 | 5177   | 0.11 |
| 3 | 187169261 | 187171532 | 2271   | 0.06 |
| 3 | 189364452 | 189386147 | 21695  | 0.40 |
| 3 | 191611935 | 191619528 | 7593   | 0.34 |
| 3 | 191682341 | 191694808 | 12467  | 0.06 |
| 3 | 191803201 | 191846961 | 43760  | 0.11 |
| 3 | 191986209 | 191990586 | 4377   | 0.06 |
| 3 | 192085531 | 192093330 | 7799   | 0.06 |



SUPPLEMENTARY INFORMATION

|   |           |           |        |      |
|---|-----------|-----------|--------|------|
| 3 | 192376131 | 192380577 | 4446   | 0.06 |
| 3 | 193084652 | 193093500 | 8848   | 0.06 |
| 3 | 194171321 | 194173223 | 1902   | 0.17 |
| 3 | 194673000 | 194682701 | 9701   | 0.06 |
| 3 | 194693381 | 194719470 | 26089  | 0.06 |
| 3 | 194829981 | 194836910 | 6929   | 0.06 |
| 3 | 194956616 | 194965177 | 8561   | 0.06 |
| 3 | 194990318 | 194993425 | 3107   | 0.17 |
| 3 | 195041874 | 195047034 | 5160   | 0.11 |
| 3 | 195467922 | 195472712 | 4790   | 0.06 |
| 3 | 195864185 | 195893166 | 28981  | 0.23 |
| 3 | 196026869 | 196039866 | 12997  | 0.34 |
| 3 | 196423307 | 196453455 | 30148  | 0.17 |
| 3 | 197023336 | 197028466 | 5130   | 0.63 |
| 3 | 197326102 | 197330015 | 3913   | 0.06 |
| 3 | 197439620 | 197443665 | 4045   | 0.06 |
| 4 | 1221731   | 1231023   | 9292   | 0.06 |
| 4 | 1349548   | 1386277   | 36729  | 0.57 |
| 4 | 1531673   | 1571414   | 39741  | 0.11 |
| 4 | 3273559   | 3274764   | 1205   | 0.17 |
| 4 | 3483685   | 3532851   | 49166  | 2.18 |
| 4 | 3858787   | 3867523   | 8736   | 0.11 |
| 4 | 3909724   | 4172117   | 262393 | 0.57 |
| 4 | 4358615   | 4363339   | 4724   | 0.06 |
| 4 | 5839850   | 5915901   | 76051  | 0.17 |
| 4 | 5990359   | 5994691   | 4332   | 0.23 |
| 4 | 7135305   | 7138704   | 3399   | 0.11 |
| 4 | 7144623   | 7147886   | 3263   | 0.17 |
| 4 | 7181189   | 7185670   | 4481   | 0.40 |
| 4 | 7446197   | 7459376   | 13179  | 0.17 |
| 4 | 7922236   | 7931111   | 8875   | 0.06 |
| 4 | 8217755   | 8238103   | 20348  | 0.46 |
| 4 | 8637198   | 8641733   | 4535   | 0.06 |
| 4 | 8643020   | 8648129   | 5109   | 0.23 |
| 4 | 8650998   | 8657219   | 6221   | 0.11 |
| 4 | 8668614   | 8674143   | 5529   | 0.06 |
| 4 | 9522093   | 9585140   | 63047  | 0.06 |
| 4 | 9993558   | 9997174   | 3616   | 0.11 |
| 4 | 10194898  | 10202797  | 7899   | 0.06 |
| 4 | 11604236  | 11605291  | 1055   | 0.06 |
| 4 | 12756993  | 12770879  | 13886  | 0.06 |
| 4 | 14341584  | 14348528  | 6944   | 0.23 |
| 4 | 14507175  | 14521998  | 14823  | 0.06 |
| 4 | 14910729  | 14938665  | 27936  | 3.78 |
| 4 | 15226735  | 15229726  | 2991   | 0.11 |
| 4 | 18791889  | 18807804  | 15915  | 0.06 |

SUPPLEMENTARY INFORMATION

|   |          |          |        |      |
|---|----------|----------|--------|------|
| 4 | 19990179 | 19994993 | 4814   | 0.11 |
| 4 | 21447157 | 21464941 | 17784  | 0.17 |
| 4 | 21516317 | 21574000 | 57683  | 0.34 |
| 4 | 22173435 | 22178154 | 4719   | 0.06 |
| 4 | 23448232 | 23451487 | 3255   | 0.06 |
| 4 | 25054956 | 25059136 | 4180   | 0.57 |
| 4 | 25500761 | 25506358 | 5597   | 0.11 |
| 4 | 25733420 | 25741710 | 8290   | 0.23 |
| 4 | 25967002 | 25982443 | 15441  | 0.06 |
| 4 | 26210471 | 26215653 | 5182   | 0.06 |
| 4 | 26441532 | 26452604 | 11072  | 0.11 |
| 4 | 26790596 | 26796037 | 5441   | 0.06 |
| 4 | 28141535 | 28149200 | 7665   | 0.06 |
| 4 | 28617248 | 28621565 | 4317   | 0.06 |
| 4 | 29926294 | 29928811 | 2517   | 0.11 |
| 4 | 31356170 | 31361660 | 5490   | 0.06 |
| 4 | 32374380 | 32386775 | 12395  | 0.06 |
| 4 | 32393088 | 32408573 | 15485  | 0.06 |
| 4 | 32438821 | 32441347 | 2526   | 0.06 |
| 4 | 34005795 | 34044853 | 39058  | 0.06 |
| 4 | 34124386 | 34133982 | 9596   | 0.06 |
| 4 | 34487675 | 34489317 | 1642   | 0.23 |
| 4 | 34770604 | 34853652 | 83048  | 0.06 |
| 4 | 35692875 | 35696259 | 3384   | 0.11 |
| 4 | 35774101 | 35776010 | 1909   | 0.06 |
| 4 | 35920542 | 35977120 | 56578  | 0.06 |
| 4 | 37991633 | 38011405 | 19772  | 0.06 |
| 4 | 38455108 | 38464757 | 9649   | 0.06 |
| 4 | 38719221 | 38726455 | 7234   | 0.17 |
| 4 | 39496873 | 39499466 | 2593   | 0.06 |
| 4 | 39568333 | 39742743 | 174410 | 1.09 |
| 4 | 39816902 | 39842473 | 25571  | 0.06 |
| 4 | 39947882 | 40046209 | 98327  | 0.40 |
| 4 | 40151635 | 40158320 | 6685   | 0.06 |
| 4 | 41404351 | 41405729 | 1378   | 0.11 |
| 4 | 45008827 | 45035653 | 26826  | 3.04 |
| 4 | 53729858 | 53736915 | 7057   | 0.17 |
| 4 | 56683362 | 56684704 | 1342   | 0.06 |
| 4 | 56841303 | 56869833 | 28530  | 0.06 |
| 4 | 57390500 | 57398396 | 7896   | 0.06 |
| 4 | 57947265 | 57952232 | 4967   | 0.23 |
| 4 | 58547806 | 58552475 | 4669   | 0.06 |
| 4 | 58791948 | 58806872 | 14924  | 0.06 |
| 4 | 61602248 | 61612986 | 10738  | 0.06 |
| 4 | 61863688 | 61874789 | 11101  | 0.06 |
| 4 | 62492811 | 62496637 | 3826   | 0.06 |

SUPPLEMENTARY INFORMATION

|   |           |           |        |      |
|---|-----------|-----------|--------|------|
| 4 | 63377655  | 63387913  | 10258  | 0.06 |
| 4 | 63521603  | 63547049  | 25446  | 0.06 |
| 4 | 64458635  | 64477743  | 19108  | 0.40 |
| 4 | 64956382  | 64974326  | 17944  | 0.80 |
| 4 | 65828363  | 65835161  | 6798   | 0.06 |
| 4 | 67739220  | 67740402  | 1182   | 0.06 |
| 4 | 68527638  | 68623755  | 96117  | 2.98 |
| 4 | 69165902  | 69176016  | 10114  | 0.06 |
| 4 | 69616698  | 69618239  | 1541   | 0.06 |
| 4 | 69718320  | 69748645  | 30325  | 0.06 |
| 4 | 69899290  | 69908682  | 9392   | 0.06 |
| 4 | 70294290  | 70414090  | 119800 | 0.11 |
| 4 | 70873002  | 70883208  | 10206  | 0.06 |
| 4 | 72209829  | 72247656  | 37827  | 0.06 |
| 4 | 75408966  | 75496578  | 87612  | 0.29 |
| 4 | 74831557  | 74859264  | 27707  | 0.11 |
| 4 | 77355267  | 77366613  | 11346  | 0.06 |
| 4 | 78354306  | 78371084  | 16778  | 0.06 |
| 4 | 85179854  | 85202135  | 22281  | 0.34 |
| 4 | 88157465  | 88163229  | 5764   | 0.06 |
| 4 | 89096633  | 89101761  | 5128   | 0.06 |
| 4 | 89441959  | 89451415  | 9456   | 0.06 |
| 4 | 89660998  | 89679819  | 18821  | 0.29 |
| 4 | 90743714  | 90750499  | 6785   | 0.06 |
| 4 | 90965465  | 90975676  | 10211  | 0.69 |
| 4 | 91281608  | 91289031  | 7423   | 0.06 |
| 4 | 91513521  | 91524802  | 11281  | 0.11 |
| 4 | 91896150  | 91911557  | 15407  | 0.06 |
| 4 | 91973845  | 92021371  | 47526  | 0.17 |
| 4 | 92105522  | 92114771  | 9249   | 0.29 |
| 4 | 92625545  | 92669550  | 44005  | 0.23 |
| 4 | 92700269  | 92719943  | 19674  | 0.06 |
| 4 | 94705293  | 94733132  | 27839  | 0.06 |
| 4 | 95009325  | 95015217  | 5892   | 0.06 |
| 4 | 95440538  | 95480637  | 40099  | 0.06 |
| 4 | 95517323  | 95520895  | 3572   | 0.06 |
| 4 | 98753206  | 98757810  | 4604   | 0.06 |
| 4 | 101605156 | 101609521 | 4365   | 0.06 |
| 4 | 103068493 | 103075119 | 6626   | 0.06 |
| 4 | 103518984 | 103536241 | 17257  | 0.06 |
| 4 | 103644887 | 103653108 | 8221   | 0.11 |
| 4 | 103819338 | 103839927 | 20589  | 0.06 |
| 4 | 104345888 | 104352505 | 6617   | 0.11 |
| 4 | 104385225 | 104391800 | 6575   | 0.11 |
| 4 | 105327073 | 105336946 | 9873   | 0.06 |
| 4 | 107003419 | 107010899 | 7480   | 0.11 |

SUPPLEMENTARY INFORMATION

|   |           |           |        |      |
|---|-----------|-----------|--------|------|
| 4 | 108453095 | 108454943 | 1848   | 0.06 |
| 4 | 108855230 | 108908471 | 53241  | 0.06 |
| 4 | 109040851 | 109043760 | 2909   | 0.06 |
| 4 | 110683327 | 110687329 | 4002   | 0.06 |
| 4 | 111285478 | 111291124 | 5646   | 0.06 |
| 4 | 111371861 | 111386488 | 14627  | 2.92 |
| 4 | 112564369 | 112617124 | 52755  | 0.11 |
| 4 | 112655003 | 112658006 | 3003   | 0.06 |
| 4 | 113433356 | 113442215 | 8859   | 0.17 |
| 4 | 114389243 | 114393972 | 4729   | 0.06 |
| 4 | 115345266 | 115355529 | 10263  | 0.40 |
| 4 | 115474508 | 115484442 | 9934   | 0.11 |
| 4 | 116393940 | 116404890 | 10950  | 0.06 |
| 4 | 116419205 | 116486562 | 67357  | 0.29 |
| 4 | 117025490 | 117041232 | 15742  | 0.06 |
| 4 | 117192874 | 117207581 | 14707  | 0.17 |
| 4 | 117223340 | 117245362 | 22022  | 0.06 |
| 4 | 117372898 | 117411847 | 38949  | 0.11 |
| 4 | 117671193 | 117678039 | 6846   | 0.17 |
| 4 | 118151707 | 118159626 | 7919   | 0.06 |
| 4 | 118356905 | 118390369 | 33464  | 0.17 |
| 4 | 120198896 | 120303410 | 104514 | 0.11 |
| 4 | 120465383 | 120474014 | 8631   | 0.06 |
| 4 | 120601503 | 120623983 | 22480  | 0.34 |
| 4 | 121394587 | 121413001 | 18414  | 0.11 |
| 4 | 121418033 | 121491679 | 73646  | 0.23 |
| 4 | 122001332 | 122004374 | 3042   | 0.06 |
| 4 | 124044107 | 124045592 | 1485   | 0.23 |
| 4 | 124293356 | 124300695 | 7339   | 0.06 |
| 4 | 126392351 | 126395215 | 2864   | 0.06 |
| 4 | 126445197 | 126449999 | 4802   | 0.06 |
| 4 | 128750763 | 128759100 | 8337   | 0.06 |
| 4 | 128923137 | 128928102 | 4965   | 0.06 |
| 4 | 129630448 | 129634823 | 4375   | 0.06 |
| 4 | 131996534 | 132024693 | 28159  | 0.52 |
| 4 | 132185584 | 132199536 | 13952  | 0.06 |
| 4 | 133349760 | 133372757 | 22997  | 0.06 |
| 4 | 133790519 | 133833400 | 42881  | 0.17 |
| 4 | 134544175 | 134659501 | 115326 | 0.17 |
| 4 | 134905734 | 134915051 | 9317   | 0.23 |
| 4 | 135091373 | 135097568 | 6195   | 0.06 |
| 4 | 135587430 | 135590244 | 2814   | 0.29 |
| 4 | 135674909 | 135680789 | 5880   | 0.06 |
| 4 | 135724321 | 135728887 | 4566   | 0.06 |
| 4 | 136005088 | 136046012 | 40924  | 0.06 |
| 4 | 136349126 | 136397242 | 48116  | 0.11 |

SUPPLEMENTARY INFORMATION

|   |           |           |        |      |
|---|-----------|-----------|--------|------|
| 4 | 136438762 | 136451448 | 12686  | 0.34 |
| 4 | 138311075 | 138313926 | 2851   | 0.06 |
| 4 | 141204226 | 141215611 | 11385  | 0.11 |
| 4 | 143832994 | 144093819 | 260825 | 4.07 |
| 4 | 144780273 | 144785210 | 4937   | 0.06 |
| 4 | 145285572 | 145391948 | 106376 | 0.40 |
| 4 | 146047752 | 146054988 | 7236   | 0.17 |
| 4 | 146545906 | 146547291 | 1385   | 0.06 |
| 4 | 149722804 | 149782678 | 59874  | 0.11 |
| 4 | 152058098 | 152064205 | 6107   | 0.06 |
| 4 | 153091334 | 153095992 | 4658   | 0.06 |
| 4 | 153494032 | 153506500 | 12468  | 0.06 |
| 4 | 155086509 | 155090483 | 3974   | 0.34 |
| 4 | 156326385 | 156328651 | 2266   | 0.11 |
| 4 | 156484072 | 156587692 | 103620 | 0.11 |
| 4 | 156914334 | 156921244 | 6910   | 0.06 |
| 4 | 157619176 | 157622061 | 2885   | 0.06 |
| 4 | 157700370 | 157720743 | 20373  | 0.57 |
| 4 | 160128568 | 160150870 | 22302  | 0.34 |
| 4 | 160169463 | 160189795 | 20332  | 0.17 |
| 4 | 160239088 | 160244984 | 5896   | 0.11 |
| 4 | 160354926 | 160361355 | 6429   | 0.06 |
| 4 | 160862071 | 160870982 | 8911   | 0.06 |
| 4 | 161300232 | 161302835 | 2603   | 0.06 |
| 4 | 161589661 | 161599289 | 9628   | 0.06 |
| 4 | 161627664 | 161643231 | 15567  | 0.17 |
| 4 | 161692625 | 161708470 | 15845  | 0.06 |
| 4 | 162351166 | 162357156 | 5990   | 0.34 |
| 4 | 164655303 | 164666188 | 10885  | 0.06 |
| 4 | 164774280 | 164777683 | 3403   | 0.06 |
| 4 | 164785832 | 164795749 | 9917   | 0.29 |
| 4 | 165068498 | 165124404 | 55906  | 0.34 |
| 4 | 165547452 | 165581517 | 34065  | 0.11 |
| 4 | 166398658 | 166462447 | 63789  | 0.06 |
| 4 | 166577973 | 166589782 | 11809  | 0.06 |
| 4 | 167535578 | 167540874 | 5296   | 0.06 |
| 4 | 167869309 | 168071368 | 202059 | 0.29 |
| 4 | 168792746 | 168797697 | 4951   | 0.06 |
| 4 | 170047931 | 170054053 | 6122   | 0.06 |
| 4 | 171211675 | 171221721 | 10046  | 0.06 |
| 4 | 171807843 | 171816979 | 9136   | 0.06 |
| 4 | 172379674 | 172426342 | 46668  | 0.06 |
| 4 | 173471356 | 173498820 | 27464  | 0.17 |
| 4 | 173545731 | 173554947 | 9216   | 0.17 |
| 4 | 173896559 | 173905006 | 8447   | 0.06 |
| 4 | 174609314 | 174614257 | 4943   | 0.06 |

SUPPLEMENTARY INFORMATION

|   |           |           |        |      |
|---|-----------|-----------|--------|------|
| 4 | 174984735 | 175103274 | 118539 | 0.06 |
| 4 | 177547006 | 177565451 | 18445  | 0.11 |
| 4 | 178040647 | 178047520 | 6873   | 0.06 |
| 4 | 179038059 | 179042420 | 4361   | 0.06 |
| 4 | 180212643 | 180217600 | 4957   | 0.11 |
| 4 | 181261499 | 181264797 | 3298   | 0.06 |
| 4 | 182054067 | 182058201 | 4134   | 0.06 |
| 4 | 182154522 | 182174533 | 20011  | 0.11 |
| 4 | 182364858 | 182374924 | 10066  | 0.11 |
| 4 | 184183318 | 184189761 | 6443   | 0.06 |
| 4 | 184811408 | 184816161 | 4753   | 0.11 |
| 4 | 184832200 | 184839680 | 7480   | 0.34 |
| 4 | 185477338 | 185498735 | 21397  | 0.06 |
| 4 | 186446056 | 186447310 | 1254   | 0.06 |
| 4 | 186921989 | 186929178 | 7189   | 1.84 |
| 4 | 187228564 | 187239773 | 11209  | 0.17 |
| 4 | 187288028 | 187309547 | 21519  | 0.11 |
| 4 | 187790575 | 187793051 | 2476   | 0.17 |
| 4 | 188023891 | 188025074 | 1183   | 0.06 |
| 4 | 188657825 | 188665453 | 7628   | 0.06 |
| 4 | 189225350 | 189229108 | 3758   | 0.06 |
| 4 | 189486816 | 189533075 | 46259  | 0.06 |
| 5 | 537222    | 542289    | 5067   | 0.17 |
| 5 | 661741    | 873886    | 212145 | 2.81 |
| 5 | 1052245   | 1093494   | 41249  | 0.57 |
| 5 | 1175988   | 1187474   | 11486  | 0.17 |
| 5 | 1662069   | 1677112   | 15043  | 0.06 |
| 5 | 1686118   | 1688112   | 1994   | 0.23 |
| 5 | 1841227   | 1852170   | 10943  | 0.06 |
| 5 | 3346139   | 3349469   | 3330   | 0.06 |
| 5 | 3693799   | 3698825   | 5026   | 0.06 |
| 5 | 4024526   | 4034431   | 9905   | 0.06 |
| 5 | 4159456   | 4167400   | 7944   | 0.06 |
| 5 | 5156542   | 5168366   | 11824  | 0.06 |
| 5 | 6551547   | 6553372   | 1825   | 0.06 |
| 5 | 6632182   | 6645034   | 12852  | 0.06 |
| 5 | 6792152   | 6795762   | 3610   | 0.06 |
| 5 | 6984313   | 6987091   | 2778   | 0.11 |
| 5 | 7178531   | 7200737   | 22206  | 0.34 |
| 5 | 8591521   | 8597734   | 6213   | 0.23 |
| 5 | 9756217   | 9770223   | 14006  | 0.06 |
| 5 | 10794874  | 10797906  | 3032   | 0.06 |
| 5 | 11448556  | 11459171  | 10615  | 0.17 |
| 5 | 11873554  | 11879797  | 6243   | 0.06 |
| 5 | 12584431  | 12669624  | 85193  | 0.29 |
| 5 | 12687505  | 12756843  | 69338  | 0.29 |

SUPPLEMENTARY INFORMATION

|   |          |          |         |      |
|---|----------|----------|---------|------|
| 5 | 13275096 | 13280689 | 5593    | 0.06 |
| 5 | 13359366 | 13382837 | 23471   | 0.11 |
| 5 | 16006130 | 16017804 | 11674   | 0.34 |
| 5 | 17318885 | 17321598 | 2713    | 0.06 |
| 5 | 17429496 | 17434500 | 5004    | 0.06 |
| 5 | 17939163 | 17945922 | 6759    | 0.06 |
| 5 | 17960987 | 17989180 | 28193   | 0.11 |
| 5 | 18007118 | 19015970 | 1008852 | 0.40 |
| 5 | 19280415 | 19286859 | 6444    | 0.69 |
| 5 | 19545165 | 19548252 | 3087    | 0.06 |
| 5 | 19605057 | 19614028 | 8971    | 0.06 |
| 5 | 19957277 | 19978017 | 20740   | 0.57 |
| 5 | 20240944 | 20262348 | 21404   | 0.29 |
| 5 | 22223236 | 22239112 | 15876   | 0.06 |
| 5 | 22556143 | 22573221 | 17078   | 0.06 |
| 5 | 23049000 | 23053079 | 4079    | 0.17 |
| 5 | 23578332 | 23598332 | 20000   | 0.06 |
| 5 | 24048775 | 24081870 | 33095   | 0.06 |
| 5 | 25424618 | 25446648 | 22030   | 0.06 |
| 5 | 25910615 | 26020006 | 109391  | 0.06 |
| 5 | 26348036 | 26356918 | 8882    | 0.06 |
| 5 | 26906750 | 26913135 | 6385    | 0.06 |
| 5 | 27099320 | 27153148 | 53828   | 0.06 |
| 5 | 28256342 | 28500607 | 244265  | 0.29 |
| 5 | 29596352 | 29624532 | 28180   | 0.11 |
| 5 | 30004495 | 30009526 | 5031    | 0.06 |
| 5 | 30110718 | 30122083 | 11365   | 0.06 |
| 5 | 30583082 | 30589514 | 6432    | 0.11 |
| 5 | 36070960 | 36074140 | 3180    | 0.06 |
| 5 | 36546199 | 36554107 | 7908    | 0.06 |
| 5 | 40074640 | 40081810 | 7170    | 0.06 |
| 5 | 40115231 | 40122096 | 6865    | 0.06 |
| 5 | 40176002 | 40184510 | 8508    | 0.06 |
| 5 | 40336444 | 40351447 | 15003   | 0.52 |
| 5 | 40767295 | 40779589 | 12294   | 0.11 |
| 5 | 41448085 | 41458135 | 10050   | 0.06 |
| 5 | 42590384 | 42603352 | 12968   | 0.06 |
| 5 | 42638320 | 42643098 | 4778    | 0.06 |
| 5 | 44189795 | 44196647 | 6852    | 0.06 |
| 5 | 44899983 | 44919855 | 19872   | 0.06 |
| 5 | 51972930 | 51979594 | 6664    | 0.06 |
| 5 | 55918030 | 55925051 | 7021    | 0.11 |
| 5 | 56111125 | 56122165 | 11040   | 0.06 |
| 5 | 57003385 | 57005440 | 2055    | 0.06 |
| 5 | 57192338 | 57228587 | 36249   | 0.29 |
| 5 | 57422028 | 57432182 | 10154   | 0.06 |

SUPPLEMENTARY INFORMATION

|   |           |           |         |      |
|---|-----------|-----------|---------|------|
| 5 | 57623336  | 57626488  | 3152    | 0.06 |
| 5 | 58355547  | 58359069  | 3522    | 0.06 |
| 5 | 61277352  | 61302716  | 25364   | 0.17 |
| 5 | 63886301  | 63899120  | 12819   | 0.06 |
| 5 | 65303174  | 65379406  | 76232   | 0.06 |
| 5 | 67342569  | 67352045  | 9476    | 0.06 |
| 5 | 69191229  | 69282601  | 91372   | 0.17 |
| 5 | 76372663  | 76376693  | 4030    | 0.11 |
| 5 | 79125957  | 79215563  | 89606   | 3.27 |
| 5 | 79372535  | 79387480  | 14945   | 0.29 |
| 5 | 79760518  | 79766425  | 5907    | 0.06 |
| 5 | 80265085  | 80276188  | 11103   | 0.06 |
| 5 | 80830158  | 80871510  | 41352   | 0.11 |
| 5 | 81202560  | 81204295  | 1735    | 0.23 |
| 5 | 81269668  | 81296457  | 26789   | 0.06 |
| 5 | 82435614  | 82519512  | 83898   | 0.40 |
| 5 | 84747973  | 84768324  | 20351   | 0.06 |
| 5 | 85094176  | 85114848  | 20672   | 0.06 |
| 5 | 85354068  | 85419065  | 64997   | 0.11 |
| 5 | 86971122  | 87057004  | 85882   | 0.17 |
| 5 | 90065665  | 90072975  | 7310    | 0.06 |
| 5 | 93430213  | 93436727  | 6514    | 0.06 |
| 5 | 93636172  | 93646340  | 10168   | 0.06 |
| 5 | 97367538  | 98689505  | 1321967 | 1.66 |
| 5 | 98753579  | 98761031  | 7452    | 0.29 |
| 5 | 99987974  | 100055023 | 67049   | 0.06 |
| 5 | 100553722 | 100587806 | 34084   | 0.11 |
| 5 | 101833530 | 101870665 | 37135   | 0.40 |
| 5 | 104107316 | 104117228 | 9912    | 0.17 |
| 5 | 104172643 | 104201262 | 28619   | 0.40 |
| 5 | 104362408 | 104446262 | 83854   | 0.06 |
| 5 | 104622750 | 104638857 | 16107   | 0.11 |
| 5 | 104870579 | 104996732 | 126153  | 0.23 |
| 5 | 105097815 | 105168044 | 70229   | 0.29 |
| 5 | 106276414 | 106280838 | 4424    | 0.11 |
| 5 | 106554601 | 106577225 | 22624   | 0.11 |
| 5 | 106890089 | 106898113 | 8024    | 0.52 |
| 5 | 107361322 | 107365793 | 4471    | 0.29 |
| 5 | 108834906 | 108888191 | 53285   | 0.11 |
| 5 | 108951434 | 108991796 | 40362   | 0.17 |
| 5 | 110024841 | 110039779 | 14938   | 0.06 |
| 5 | 110416853 | 110443223 | 26370   | 0.06 |
| 5 | 112013623 | 112030052 | 16429   | 0.11 |
| 5 | 112290835 | 112347635 | 56800   | 0.17 |
| 5 | 112934564 | 112941755 | 7191    | 0.11 |
| 5 | 113620897 | 113646891 | 25994   | 0.17 |



SUPPLEMENTARY INFORMATION

|   |           |           |        |      |
|---|-----------|-----------|--------|------|
| 5 | 113816844 | 113836766 | 19922  | 1.43 |
| 5 | 113991787 | 113999533 | 7746   | 0.23 |
| 5 | 114245738 | 114248895 | 3157   | 0.06 |
| 5 | 114259261 | 114264647 | 5386   | 0.06 |
| 5 | 114677683 | 114680008 | 2325   | 0.11 |
| 5 | 115067757 | 115072691 | 4934   | 0.06 |
| 5 | 116872257 | 116874652 | 2395   | 0.11 |
| 5 | 116951528 | 116967982 | 16454  | 0.06 |
| 5 | 117976748 | 118002366 | 25618  | 0.06 |
| 5 | 119300538 | 119306332 | 5794   | 0.06 |
| 5 | 120029759 | 120106037 | 76278  | 0.11 |
| 5 | 120304531 | 120307928 | 3397   | 0.06 |
| 5 | 120588837 | 120590610 | 1773   | 0.06 |
| 5 | 120725334 | 120737551 | 12217  | 0.06 |
| 5 | 120804905 | 120845039 | 40134  | 0.11 |
| 5 | 121350603 | 121370202 | 19599  | 0.23 |
| 5 | 121919079 | 121924912 | 5833   | 0.06 |
| 5 | 123287268 | 123288507 | 1239   | 0.06 |
| 5 | 123475626 | 123485369 | 9743   | 0.17 |
| 5 | 126159007 | 126171614 | 12607  | 0.63 |
| 5 | 127109951 | 127120090 | 10139  | 0.11 |
| 5 | 128879045 | 128885806 | 6761   | 0.06 |
| 5 | 129291662 | 129295132 | 3470   | 0.11 |
| 5 | 130738468 | 130781661 | 43193  | 0.11 |
| 5 | 132693008 | 132708607 | 15599  | 0.11 |
| 5 | 132989674 | 133025211 | 35537  | 0.06 |
| 5 | 134596037 | 134736501 | 140464 | 0.97 |
| 5 | 135445219 | 135448156 | 2937   | 0.11 |
| 5 | 135670775 | 135679910 | 9135   | 0.11 |
| 5 | 136535514 | 136540364 | 4850   | 0.06 |
| 5 | 136551466 | 136582278 | 30812  | 0.06 |
| 5 | 138441242 | 138454889 | 13647  | 0.23 |
| 5 | 138725652 | 138762993 | 37341  | 0.46 |
| 5 | 140413110 | 140504522 | 91412  | 0.23 |
| 5 | 140929431 | 140942008 | 12577  | 0.06 |
| 5 | 141097310 | 141101891 | 4581   | 0.11 |
| 5 | 141188399 | 141191953 | 3554   | 0.11 |
| 5 | 141341387 | 141345024 | 3637   | 0.23 |
| 5 | 142120871 | 142150782 | 29911  | 0.06 |
| 5 | 143849253 | 143851230 | 1977   | 0.11 |
| 5 | 144014500 | 144023551 | 9051   | 0.06 |
| 5 | 144135070 | 144139762 | 4692   | 0.06 |
| 5 | 144148409 | 144161181 | 12772  | 0.11 |
| 5 | 144518625 | 144520288 | 1663   | 0.06 |
| 5 | 144675269 | 144682743 | 7474   | 0.06 |
| 5 | 145933370 | 145935315 | 1945   | 0.06 |

SUPPLEMENTARY INFORMATION

|   |           |           |       |      |
|---|-----------|-----------|-------|------|
| 5 | 146132805 | 146182719 | 49914 | 0.06 |
| 5 | 146409543 | 146417922 | 8379  | 0.11 |
| 5 | 146550981 | 146558898 | 7917  | 0.06 |
| 5 | 147260623 | 147264009 | 3386  | 0.06 |
| 5 | 147312447 | 147318885 | 6438  | 0.06 |
| 5 | 147349399 | 147357904 | 8505  | 0.06 |
| 5 | 147797762 | 147805157 | 7395  | 0.34 |
| 5 | 149636555 | 149640603 | 4048  | 0.06 |
| 5 | 150116758 | 150124595 | 7837  | 0.06 |
| 5 | 151020073 | 151023009 | 2936  | 0.06 |
| 5 | 151975081 | 152001438 | 26357 | 0.06 |
| 5 | 152773633 | 152784200 | 10567 | 0.06 |
| 5 | 155024616 | 155028460 | 3844  | 0.06 |
| 5 | 157033084 | 157052193 | 19109 | 0.29 |
| 5 | 158218325 | 158228240 | 9915  | 0.06 |
| 5 | 162372456 | 162383343 | 10887 | 0.06 |
| 5 | 163131669 | 163136905 | 5236  | 0.11 |
| 5 | 163588237 | 163596967 | 8730  | 0.06 |
| 5 | 163747690 | 163755444 | 7754  | 0.80 |
| 5 | 165295522 | 165298768 | 3246  | 0.75 |
| 5 | 165365075 | 165373662 | 8587  | 0.06 |
| 5 | 166340689 | 166352908 | 12219 | 0.11 |
| 5 | 170450803 | 170453067 | 2264  | 0.06 |
| 5 | 170721011 | 170742121 | 21110 | 0.06 |
| 5 | 171642848 | 171664463 | 21615 | 0.11 |
| 5 | 173262829 | 173265345 | 2516  | 0.06 |
| 5 | 173667148 | 173672181 | 5033  | 0.11 |
| 5 | 174739342 | 174743179 | 3837  | 0.06 |
| 5 | 174870583 | 174876400 | 5817  | 0.06 |
| 5 | 175046828 | 175049461 | 2633  | 0.06 |
| 5 | 175883811 | 175891232 | 7421  | 0.11 |
| 5 | 176728959 | 176736805 | 7846  | 0.06 |
| 5 | 176835223 | 176880962 | 45739 | 0.52 |
| 5 | 177944712 | 177974508 | 29796 | 1.03 |
| 5 | 177985488 | 178002696 | 17208 | 0.06 |
| 5 | 178065631 | 178071979 | 6348  | 0.06 |
| 5 | 178536523 | 178537788 | 1265  | 0.11 |
| 5 | 178768588 | 178775309 | 6721  | 0.06 |
| 5 | 179126018 | 179140021 | 14003 | 0.11 |
| 5 | 179297794 | 179303061 | 5267  | 0.06 |
| 5 | 179773896 | 179804248 | 30352 | 0.17 |
| 6 | 902934    | 911285    | 8351  | 0.06 |
| 6 | 1993750   | 2005994   | 12244 | 0.06 |
| 6 | 3693987   | 3711111   | 17124 | 0.11 |
| 6 | 4170590   | 4174271   | 3681  | 0.17 |
| 6 | 4692663   | 4697259   | 4596  | 0.06 |

SUPPLEMENTARY INFORMATION

|   |          |          |        |      |
|---|----------|----------|--------|------|
| 6 | 5167360  | 5510129  | 342769 | 0.29 |
| 6 | 6172069  | 6176811  | 4742   | 0.06 |
| 6 | 6963726  | 6965604  | 1878   | 0.06 |
| 6 | 9495536  | 9519108  | 23572  | 0.06 |
| 6 | 10152776 | 10177380 | 24604  | 0.06 |
| 6 | 10497171 | 10542893 | 45722  | 0.06 |
| 6 | 11798245 | 11918585 | 120340 | 0.06 |
| 6 | 12210897 | 12213464 | 2567   | 0.06 |
| 6 | 15762117 | 15774010 | 11893  | 0.06 |
| 6 | 16568561 | 16573598 | 5037   | 0.11 |
| 6 | 17229572 | 17252111 | 22539  | 0.11 |
| 6 | 19227627 | 19245135 | 17508  | 0.23 |
| 6 | 20581597 | 20589110 | 7513   | 0.06 |
| 6 | 21827479 | 21832315 | 4836   | 0.23 |
| 6 | 23609043 | 23623655 | 14612  | 0.23 |
| 6 | 23811997 | 23816462 | 4465   | 0.06 |
| 6 | 26282094 | 26295463 | 13369  | 0.11 |
| 6 | 26344105 | 26352025 | 7920   | 3.44 |
| 6 | 26614056 | 26619100 | 5044   | 0.46 |
| 6 | 27240386 | 27247211 | 6825   | 0.06 |
| 6 | 27330850 | 27338739 | 7889   | 0.11 |
| 6 | 27684784 | 27691413 | 6629   | 0.06 |
| 6 | 28050416 | 28061465 | 11049  | 0.23 |
| 6 | 28419666 | 28424457 | 4791   | 0.06 |
| 6 | 28700703 | 28719042 | 18339  | 0.80 |
| 6 | 28748568 | 28764737 | 16169  | 0.17 |
| 6 | 28856620 | 28860233 | 3613   | 0.06 |
| 6 | 29031986 | 29042376 | 10390  | 0.52 |
| 6 | 29517512 | 29534259 | 16747  | 1.09 |
| 6 | 29889788 | 29931412 | 41624  | 3.33 |
| 6 | 30782905 | 30792404 | 9499   | 0.06 |
| 6 | 31025813 | 31029915 | 4102   | 0.06 |
| 6 | 31387541 | 31488621 | 101080 | 1.84 |
| 6 | 31614248 | 31618317 | 4069   | 0.06 |
| 6 | 31833091 | 31839763 | 6672   | 0.06 |
| 6 | 32749447 | 32752812 | 3365   | 0.06 |
| 6 | 33995724 | 34000578 | 4854   | 0.11 |
| 6 | 38171706 | 38173546 | 1840   | 0.06 |
| 6 | 38209891 | 38218629 | 8738   | 0.06 |
| 6 | 38870847 | 38873325 | 2478   | 0.06 |
| 6 | 39190089 | 39195069 | 4980   | 0.06 |
| 6 | 39325801 | 39328887 | 3086   | 0.06 |
| 6 | 40395655 | 40401121 | 5466   | 0.57 |
| 6 | 42183647 | 42185910 | 2263   | 0.06 |
| 6 | 42537378 | 42631935 | 94557  | 0.23 |
| 6 | 42812727 | 42862843 | 50116  | 0.11 |

SUPPLEMENTARY INFORMATION

|   |          |          |        |      |
|---|----------|----------|--------|------|
| 6 | 44894997 | 44898585 | 3588   | 0.06 |
| 6 | 48567251 | 48611491 | 44240  | 0.06 |
| 6 | 52767229 | 52804387 | 37158  | 0.06 |
| 6 | 52925013 | 52930135 | 5122   | 0.06 |
| 6 | 53990706 | 54001558 | 10852  | 0.23 |
| 6 | 55788116 | 55796080 | 7964   | 0.06 |
| 6 | 56363288 | 56366925 | 3637   | 0.06 |
| 6 | 60383189 | 60395845 | 12656  | 0.06 |
| 6 | 63220704 | 63238458 | 17754  | 0.17 |
| 6 | 64640883 | 64656671 | 15788  | 0.06 |
| 6 | 65102147 | 65354367 | 252220 | 0.11 |
| 6 | 65700825 | 65705727 | 4902   | 0.06 |
| 6 | 66238936 | 66726868 | 487932 | 2.01 |
| 6 | 67072567 | 67084552 | 11985  | 0.06 |
| 6 | 68019238 | 68021821 | 2583   | 0.06 |
| 6 | 69504952 | 69515019 | 10067  | 0.06 |
| 6 | 70889615 | 70891807 | 2192   | 0.11 |
| 6 | 71447526 | 71450697 | 3171   | 0.11 |
| 6 | 71987321 | 71989810 | 2489   | 0.06 |
| 6 | 73387004 | 73399746 | 12742  | 0.06 |
| 6 | 73447894 | 73529092 | 81198  | 0.11 |
| 6 | 73536669 | 73549323 | 12654  | 0.06 |
| 6 | 73957565 | 73975267 | 17702  | 0.06 |
| 6 | 74122681 | 74123762 | 1081   | 0.17 |
| 6 | 74383321 | 74387332 | 4011   | 0.06 |
| 6 | 76853349 | 76878407 | 25058  | 0.17 |
| 6 | 77124398 | 77144466 | 20068  | 0.63 |
| 6 | 77616376 | 77624914 | 8538   | 0.06 |
| 6 | 78149819 | 78467228 | 317409 | 3.21 |
| 6 | 80489109 | 80508195 | 19086  | 0.06 |
| 6 | 80575520 | 80584120 | 8600   | 1.61 |
| 6 | 80794111 | 80805406 | 11295  | 0.11 |
| 6 | 81587173 | 81659962 | 72789  | 0.06 |
| 6 | 83519395 | 83522280 | 2885   | 0.06 |
| 6 | 87668196 | 87693993 | 25797  | 0.06 |
| 6 | 88412775 | 88433272 | 20497  | 0.06 |
| 6 | 88983718 | 89001975 | 18257  | 0.06 |
| 6 | 90646196 | 90652393 | 6197   | 0.06 |
| 6 | 92710704 | 92718333 | 7629   | 0.06 |
| 6 | 92820218 | 92824665 | 4447   | 0.06 |
| 6 | 92878116 | 92889133 | 11017  | 0.06 |
| 6 | 94225590 | 94231662 | 6072   | 0.06 |
| 6 | 94583307 | 94636049 | 52742  | 0.11 |
| 6 | 94763972 | 94923583 | 159611 | 0.11 |
| 6 | 97731610 | 97743512 | 11902  | 0.06 |
| 6 | 99956729 | 99962241 | 5512   | 0.06 |

SUPPLEMENTARY INFORMATION

|   |           |           |        |      |
|---|-----------|-----------|--------|------|
| 6 | 102717218 | 102832775 | 115557 | 0.17 |
| 6 | 103552569 | 103556472 | 3903   | 0.06 |
| 6 | 103675469 | 103700308 | 24839  | 0.06 |
| 6 | 104462210 | 104487762 | 25552  | 0.06 |
| 6 | 104725241 | 104869061 | 143820 | 0.34 |
| 6 | 105186804 | 105199916 | 13112  | 0.06 |
| 6 | 107135643 | 107177000 | 41357  | 0.11 |
| 6 | 107776211 | 107782259 | 6048   | 0.06 |
| 6 | 110075337 | 110091553 | 16216  | 0.52 |
| 6 | 112321323 | 112322466 | 1143   | 0.17 |
| 6 | 113579449 | 113582033 | 2584   | 0.06 |
| 6 | 116326406 | 116328587 | 2181   | 0.11 |
| 6 | 117756414 | 117763184 | 6770   | 0.52 |
| 6 | 125162408 | 125169709 | 7301   | 0.06 |
| 6 | 126657671 | 126703978 | 46307  | 0.06 |
| 6 | 128750646 | 128772127 | 21481  | 0.06 |
| 6 | 129418302 | 129425960 | 7658   | 0.17 |
| 6 | 129486484 | 129489364 | 2880   | 0.06 |
| 6 | 129611643 | 129633972 | 22329  | 0.46 |
| 6 | 129714667 | 129720744 | 6077   | 0.46 |
| 6 | 132600101 | 132604474 | 4373   | 0.34 |
| 6 | 136486013 | 136508794 | 22781  | 0.06 |
| 6 | 136794748 | 136813866 | 19118  | 0.06 |
| 6 | 140066616 | 140069969 | 3353   | 0.11 |
| 6 | 140406508 | 140413832 | 7324   | 0.06 |
| 6 | 140455086 | 140459940 | 4854   | 0.06 |
| 6 | 140543421 | 140596593 | 53172  | 0.06 |
| 6 | 141370404 | 141388285 | 17881  | 0.11 |
| 6 | 141573091 | 141589919 | 16828  | 0.11 |
| 6 | 141640911 | 141875365 | 234454 | 0.69 |
| 6 | 141938035 | 141962061 | 24026  | 0.06 |
| 6 | 142650034 | 142652702 | 2668   | 0.23 |
| 6 | 144821373 | 144824770 | 3397   | 0.29 |
| 6 | 146627370 | 146705287 | 77917  | 0.11 |
| 6 | 147179348 | 147183827 | 4479   | 0.06 |
| 6 | 149753911 | 149792036 | 38125  | 0.23 |
| 6 | 149931160 | 149949450 | 18290  | 0.06 |
| 6 | 151005819 | 151007201 | 1382   | 0.23 |
| 6 | 151063827 | 151071137 | 7310   | 0.06 |
| 6 | 151297100 | 151302345 | 5245   | 0.06 |
| 6 | 151979492 | 151989333 | 9841   | 0.57 |
| 6 | 153464352 | 153475941 | 11589  | 0.23 |
| 6 | 155250202 | 155289290 | 39088  | 0.06 |
| 6 | 155785980 | 155806677 | 20697  | 0.06 |
| 6 | 158740396 | 158757041 | 16645  | 0.06 |
| 6 | 160482146 | 160486434 | 4288   | 0.63 |

SUPPLEMENTARY INFORMATION

|   |           |           |        |      |
|---|-----------|-----------|--------|------|
| 6 | 162297190 | 162329478 | 32288  | 0.11 |
| 6 | 162396542 | 162414356 | 17814  | 0.06 |
| 6 | 162562811 | 162659326 | 96515  | 0.11 |
| 6 | 163373474 | 163376743 | 3269   | 0.06 |
| 6 | 165382401 | 165385747 | 3346   | 0.06 |
| 6 | 166693660 | 166741586 | 47926  | 0.06 |
| 6 | 167268243 | 167314230 | 45987  | 0.06 |
| 6 | 167322466 | 167359267 | 36801  | 0.06 |
| 6 | 167745609 | 167758721 | 13112  | 0.06 |
| 6 | 167989168 | 167993206 | 4038   | 0.29 |
| 6 | 168040800 | 168093484 | 52684  | 1.26 |
| 6 | 168590686 | 168598990 | 8304   | 0.23 |
| 6 | 169106742 | 169120465 | 13723  | 0.11 |
| 7 | 991481    | 1012717   | 21236  | 0.11 |
| 7 | 1108367   | 1129983   | 21616  | 0.06 |
| 7 | 1185232   | 1223395   | 38163  | 0.11 |
| 7 | 1255586   | 1289071   | 33485  | 0.34 |
| 7 | 1537068   | 1562800   | 25732  | 0.17 |
| 7 | 1738406   | 1751712   | 13306  | 0.23 |
| 7 | 2001609   | 2016690   | 15081  | 0.40 |
| 7 | 2629191   | 2666844   | 37653  | 0.34 |
| 7 | 2875744   | 2887938   | 12194  | 0.06 |
| 7 | 2905708   | 2907430   | 1722   | 0.06 |
| 7 | 3348364   | 3352241   | 3877   | 0.11 |
| 7 | 3354836   | 3412970   | 58134  | 0.06 |
| 7 | 3571976   | 3578511   | 6535   | 0.46 |
| 7 | 3630881   | 3635650   | 4769   | 0.06 |
| 7 | 3676035   | 3687895   | 11860  | 0.06 |
| 7 | 3866057   | 3873656   | 7599   | 0.06 |
| 7 | 4099277   | 4101082   | 1805   | 0.06 |
| 7 | 4299782   | 4301317   | 1535   | 0.06 |
| 7 | 4315576   | 4495828   | 180252 | 1.20 |
| 7 | 4558414   | 4575575   | 17161  | 0.34 |
| 7 | 4783328   | 4804237   | 20909  | 0.92 |
| 7 | 5137374   | 5150247   | 12873  | 0.06 |
| 7 | 5988559   | 6007152   | 18593  | 0.11 |
| 7 | 6209299   | 6232553   | 23254  | 0.06 |
| 7 | 6289315   | 6370897   | 81582  | 0.40 |
| 7 | 7287120   | 7353766   | 66646  | 0.06 |
| 7 | 7884653   | 7885966   | 1313   | 0.11 |
| 7 | 9033418   | 9042935   | 9517   | 0.06 |
| 7 | 9257624   | 9262682   | 5058   | 0.40 |
| 7 | 9593325   | 9596844   | 3519   | 0.11 |
| 7 | 9614276   | 9618269   | 3993   | 0.23 |
| 7 | 9828799   | 9831380   | 2581   | 0.06 |
| 7 | 10074193  | 10093784  | 19591  | 0.06 |

SUPPLEMENTARY INFORMATION

|   |          |          |        |       |
|---|----------|----------|--------|-------|
| 7 | 10205790 | 10263997 | 58207  | 0.11  |
| 7 | 11299546 | 11361901 | 62355  | 0.11  |
| 7 | 11668033 | 11673573 | 5540   | 0.11  |
| 7 | 12350561 | 12393569 | 43008  | 0.11  |
| 7 | 13029202 | 13035492 | 6290   | 0.06  |
| 7 | 13068725 | 13090051 | 21326  | 2.29  |
| 7 | 13275130 | 13277065 | 1935   | 0.06  |
| 7 | 13545049 | 13575780 | 30731  | 0.06  |
| 7 | 13841161 | 13846099 | 4938   | 0.29  |
| 7 | 13853049 | 13879209 | 26160  | 0.06  |
| 7 | 14141391 | 14162680 | 21289  | 0.06  |
| 7 | 14469683 | 14474919 | 5236   | 0.06  |
| 7 | 14514921 | 14529220 | 14299  | 0.06  |
| 7 | 14710955 | 14721747 | 10792  | 0.11  |
| 7 | 15132349 | 15134859 | 2510   | 0.06  |
| 7 | 15239863 | 15244407 | 4544   | 0.06  |
| 7 | 16222610 | 16373887 | 151277 | 0.17  |
| 7 | 17470600 | 17473964 | 3364   | 0.06  |
| 7 | 17530855 | 17635952 | 105097 | 0.06  |
| 7 | 18296669 | 18308034 | 11365  | 0.06  |
| 7 | 19051984 | 19095587 | 43603  | 0.11  |
| 7 | 20267888 | 20288064 | 20176  | 3.10  |
| 7 | 22003001 | 22007544 | 4543   | 0.06  |
| 7 | 22743170 | 22755534 | 12364  | 0.06  |
| 7 | 22774123 | 22794012 | 19889  | 0.06  |
| 7 | 24058110 | 24074437 | 16327  | 0.11  |
| 7 | 25313113 | 25333518 | 20405  | 0.06  |
| 7 | 25360111 | 25375572 | 15461  | 0.06  |
| 7 | 26577050 | 26579861 | 2811   | 0.17  |
| 7 | 26738787 | 26763444 | 24657  | 0.06  |
| 7 | 28356110 | 28365779 | 9669   | 0.06  |
| 7 | 28987022 | 28995737 | 8715   | 0.29  |
| 7 | 29054969 | 29059564 | 4595   | 0.06  |
| 7 | 29636481 | 29744895 | 108414 | 0.92  |
| 7 | 29823519 | 29827466 | 3947   | 0.11  |
| 7 | 30451695 | 30456758 | 5063   | 0.11  |
| 7 | 30850001 | 30873404 | 23403  | 0.17  |
| 7 | 31383170 | 31386069 | 2899   | 0.06  |
| 7 | 33178093 | 33197877 | 19784  | 0.06  |
| 7 | 36861974 | 36869263 | 7289   | 0.11  |
| 7 | 37731368 | 37851005 | 119637 | 0.34  |
| 7 | 38186533 | 38196002 | 9469   | 0.06  |
| 7 | 38256357 | 38338702 | 82345  | 10.03 |
| 7 | 38349716 | 38377955 | 28239  | 0.06  |
| 7 | 38607291 | 38613193 | 5902   | 0.06  |
| 7 | 40225809 | 40246029 | 20220  | 0.06  |

SUPPLEMENTARY INFORMATION

|   |          |          |        |      |
|---|----------|----------|--------|------|
| 7 | 40271638 | 40274754 | 3116   | 0.11 |
| 7 | 41473344 | 41474698 | 1354   | 0.40 |
| 7 | 44763687 | 44768817 | 5130   | 0.06 |
| 7 | 47143093 | 47145485 | 2392   | 0.06 |
| 7 | 51976058 | 51981065 | 5007   | 0.17 |
| 7 | 53207019 | 53211442 | 4423   | 0.06 |
| 7 | 53586309 | 53649018 | 62709  | 0.06 |
| 7 | 54762510 | 54768791 | 6281   | 0.06 |
| 7 | 55811496 | 55853114 | 41618  | 0.17 |
| 7 | 56198735 | 56211388 | 12653  | 0.06 |
| 7 | 56544583 | 56558320 | 13737  | 0.34 |
| 7 | 57176453 | 57195560 | 19107  | 0.06 |
| 7 | 57387311 | 57395936 | 8625   | 0.06 |
| 7 | 62742653 | 62997884 | 255231 | 4.42 |
| 7 | 63252691 | 63268846 | 16155  | 0.17 |
| 7 | 64234704 | 64243653 | 8949   | 0.06 |
| 7 | 64268823 | 64277609 | 8786   | 0.06 |
| 7 | 64446888 | 64621160 | 174272 | 0.06 |
| 7 | 64702947 | 64750963 | 48016  | 0.29 |
| 7 | 65045230 | 65059834 | 14604  | 0.06 |
| 7 | 65984729 | 66056240 | 71511  | 0.06 |
| 7 | 66638105 | 66647208 | 9103   | 0.06 |
| 7 | 67358035 | 67399305 | 41270  | 0.06 |
| 7 | 68191556 | 68201186 | 9630   | 0.57 |
| 7 | 68537021 | 68540854 | 3833   | 0.06 |
| 7 | 70447221 | 70452025 | 4804   | 0.06 |
| 7 | 70866248 | 70878095 | 11847  | 0.52 |
| 7 | 72262936 | 72305492 | 42556  | 0.06 |
| 7 | 72500699 | 72517939 | 17240  | 0.57 |
| 7 | 74009516 | 74066239 | 56723  | 0.29 |
| 7 | 74115646 | 74154095 | 38449  | 0.11 |
| 7 | 74205625 | 74253943 | 48318  | 0.17 |
| 7 | 74323737 | 74357419 | 33682  | 0.17 |
| 7 | 74393989 | 74446388 | 52399  | 0.63 |
| 7 | 75765166 | 75815587 | 50421  | 0.40 |
| 7 | 78443163 | 78446245 | 3082   | 0.11 |
| 7 | 78499655 | 78520971 | 21316  | 0.06 |
| 7 | 78692748 | 78694533 | 1785   | 0.06 |
| 7 | 79274493 | 79281080 | 6587   | 0.06 |
| 7 | 79863894 | 79875114 | 11220  | 0.06 |
| 7 | 80331775 | 80336864 | 5089   | 0.06 |
| 7 | 80986541 | 80991146 | 4605   | 0.06 |
| 7 | 81471211 | 81477958 | 6747   | 0.17 |
| 7 | 83493602 | 83499168 | 5566   | 0.11 |
| 7 | 85400976 | 85423179 | 22203  | 0.29 |
| 7 | 85449699 | 85475288 | 25589  | 0.11 |



SUPPLEMENTARY INFORMATION

|   |           |           |        |      |
|---|-----------|-----------|--------|------|
| 7 | 85882236  | 85893338  | 11102  | 0.06 |
| 7 | 86771959  | 86780457  | 8498   | 0.06 |
| 7 | 90162845  | 90171041  | 8196   | 0.06 |
| 7 | 91958722  | 92039540  | 80818  | 0.23 |
| 7 | 93592090  | 93624851  | 32761  | 0.06 |
| 7 | 100240611 | 100307211 | 66600  | 0.34 |
| 7 | 100755214 | 100786529 | 31315  | 0.06 |
| 7 | 101779421 | 101785228 | 5807   | 0.11 |
| 7 | 105326396 | 105356575 | 30179  | 0.06 |
| 7 | 105426782 | 105462577 | 35795  | 0.34 |
| 7 | 105473100 | 105476012 | 2912   | 0.06 |
| 7 | 106176858 | 106179918 | 3060   | 0.06 |
| 7 | 106421043 | 106422167 | 1124   | 0.06 |
| 7 | 107468612 | 107475407 | 6795   | 0.11 |
| 7 | 108862455 | 108904752 | 42297  | 0.06 |
| 7 | 109442967 | 109464142 | 21175  | 0.75 |
| 7 | 109816478 | 109822243 | 5765   | 0.06 |
| 7 | 110632371 | 110671861 | 39490  | 0.06 |
| 7 | 110846352 | 110879734 | 33382  | 0.06 |
| 7 | 111140642 | 111443435 | 302793 | 2.47 |
| 7 | 111738162 | 111789826 | 51664  | 0.06 |
| 7 | 112303547 | 112320917 | 17370  | 0.17 |
| 7 | 112343661 | 112350577 | 6916   | 0.06 |
| 7 | 113666922 | 113761488 | 94566  | 0.06 |
| 7 | 114635514 | 114651380 | 15866  | 0.11 |
| 7 | 115405540 | 115437139 | 31599  | 0.06 |
| 7 | 115476249 | 115484286 | 8037   | 0.06 |
| 7 | 118487954 | 118530461 | 42507  | 2.29 |
| 7 | 118666685 | 118671460 | 4775   | 0.06 |
| 7 | 122123669 | 122178700 | 55031  | 0.06 |
| 7 | 123680381 | 123685654 | 5273   | 0.17 |
| 7 | 125236132 | 125250310 | 14178  | 0.06 |
| 7 | 125277987 | 125295173 | 17186  | 0.06 |
| 7 | 125539465 | 125556916 | 17451  | 0.06 |
| 7 | 125848374 | 125853906 | 5532   | 0.06 |
| 7 | 127161935 | 127166678 | 4743   | 0.11 |
| 7 | 129766882 | 129778156 | 11274  | 0.11 |
| 7 | 130216351 | 130221866 | 5515   | 0.06 |
| 7 | 134538966 | 134573524 | 34558  | 0.06 |
| 7 | 135522216 | 135530649 | 8433   | 0.06 |
| 7 | 135678297 | 135681044 | 2747   | 0.23 |
| 7 | 136381362 | 136397415 | 16053  | 0.29 |
| 7 | 137128719 | 137133266 | 4547   | 0.06 |
| 7 | 138195102 | 138205280 | 10178  | 0.06 |
| 7 | 141986407 | 141998026 | 11619  | 0.06 |
| 7 | 142129271 | 142141614 | 12343  | 0.06 |

SUPPLEMENTARY INFORMATION

|   |           |           |       |      |
|---|-----------|-----------|-------|------|
| 7 | 143128657 | 143193775 | 65118 | 0.34 |
| 7 | 143387481 | 143396731 | 9250  | 0.11 |
| 7 | 144084303 | 144113806 | 29503 | 0.23 |
| 7 | 145064291 | 145074478 | 10187 | 0.17 |
| 7 | 146096868 | 146102035 | 5167  | 0.52 |
| 7 | 146534616 | 146557416 | 22800 | 0.11 |
| 7 | 148151055 | 148154165 | 3110  | 0.06 |
| 7 | 148934474 | 148947457 | 12983 | 1.95 |
| 7 | 149598842 | 149618038 | 19196 | 0.06 |
| 7 | 149668212 | 149671621 | 3409  | 0.11 |
| 7 | 150351675 | 150356717 | 5042  | 0.06 |
| 7 | 150538576 | 150542588 | 4012  | 0.06 |
| 7 | 150610251 | 150622590 | 12339 | 0.06 |
| 7 | 150751785 | 150758207 | 6422  | 0.06 |
| 7 | 150856387 | 150865114 | 8727  | 0.46 |
| 7 | 150868863 | 150875668 | 6805  | 0.17 |
| 7 | 152690784 | 152700845 | 10061 | 0.17 |
| 7 | 153497075 | 153509603 | 12528 | 1.20 |
| 7 | 154711618 | 154723732 | 12114 | 0.17 |
| 7 | 155093527 | 155097474 | 3947  | 1.49 |
| 7 | 155145324 | 155156283 | 10959 | 0.06 |
| 7 | 155166389 | 155189056 | 22667 | 0.57 |
| 7 | 155265157 | 155287886 | 22729 | 0.06 |
| 7 | 155569233 | 155571547 | 2314  | 0.06 |
| 7 | 156530238 | 156541965 | 11727 | 0.11 |
| 7 | 156840985 | 156850466 | 9481  | 0.06 |
| 7 | 156902733 | 156908494 | 5761  | 0.23 |
| 7 | 157277234 | 157284746 | 7512  | 0.06 |
| 7 | 157421025 | 157429029 | 8004  | 0.34 |
| 7 | 157809785 | 157813447 | 3662  | 0.17 |
| 7 | 158149215 | 158154214 | 4999  | 0.06 |
| 7 | 158515597 | 158537228 | 21631 | 0.06 |
| 7 | 158595319 | 158623511 | 28192 | 0.23 |
| 7 | 158677524 | 158683456 | 5932  | 0.23 |
| 7 | 158706303 | 158729046 | 22743 | 0.11 |
| 8 | 981580    | 1020267   | 38687 | 0.06 |
| 8 | 1066903   | 1106870   | 39967 | 0.29 |
| 8 | 1348873   | 1350184   | 1311  | 0.17 |
| 8 | 1356997   | 1358754   | 1757  | 0.17 |
| 8 | 1724613   | 1726632   | 2019  | 0.17 |
| 8 | 2148982   | 2156817   | 7835  | 0.06 |
| 8 | 2158771   | 2211989   | 53218 | 0.57 |
| 8 | 2731282   | 2733490   | 2208  | 0.11 |
| 8 | 3029873   | 3036511   | 6638  | 0.63 |
| 8 | 3257643   | 3270577   | 12934 | 0.11 |
| 8 | 3348940   | 3352569   | 3629  | 0.06 |

SUPPLEMENTARY INFORMATION

|   |          |          |        |      |
|---|----------|----------|--------|------|
| 8 | 3396246  | 3402609  | 6363   | 0.11 |
| 8 | 3659270  | 3664857  | 5587   | 0.06 |
| 8 | 4009734  | 4017975  | 8241   | 0.06 |
| 8 | 4056077  | 4063472  | 7395   | 0.06 |
| 8 | 4110409  | 4112015  | 1606   | 0.17 |
| 8 | 4168284  | 4176385  | 8101   | 0.46 |
| 8 | 4290472  | 4300260  | 9788   | 0.06 |
| 8 | 4423415  | 4463888  | 40473  | 0.06 |
| 8 | 4617952  | 4630893  | 12941  | 0.57 |
| 8 | 4653081  | 4657165  | 4084   | 0.40 |
| 8 | 4725196  | 4732176  | 6980   | 0.11 |
| 8 | 5028794  | 5038475  | 9681   | 0.06 |
| 8 | 5050187  | 5057024  | 6837   | 0.06 |
| 8 | 5213748  | 5218567  | 4819   | 0.23 |
| 8 | 5571568  | 5573175  | 1607   | 0.06 |
| 8 | 6101073  | 6126814  | 25741  | 2.01 |
| 8 | 6294339  | 6296791  | 2452   | 0.17 |
| 8 | 6314862  | 6351904  | 37042  | 0.40 |
| 8 | 6499416  | 6507401  | 7985   | 0.06 |
| 8 | 6838495  | 6841108  | 2613   | 0.17 |
| 8 | 7154036  | 7785129  | 631093 | 0.40 |
| 8 | 8722087  | 8772426  | 50339  | 0.23 |
| 8 | 9852174  | 9860768  | 8594   | 0.06 |
| 8 | 11130043 | 11134371 | 4328   | 0.23 |
| 8 | 11842178 | 11843741 | 1563   | 0.23 |
| 8 | 11916380 | 11930179 | 13799  | 0.11 |
| 8 | 13619440 | 13626521 | 7081   | 0.11 |
| 8 | 13652018 | 13756130 | 104112 | 2.24 |
| 8 | 13795213 | 13838525 | 43312  | 0.29 |
| 8 | 14559618 | 14560822 | 1204   | 0.06 |
| 8 | 14651084 | 14658468 | 7384   | 0.46 |
| 8 | 14689850 | 14718386 | 28536  | 0.06 |
| 8 | 15562268 | 15575144 | 12876  | 0.17 |
| 8 | 15920498 | 15929380 | 8882   | 0.06 |
| 8 | 15958485 | 15961693 | 3208   | 0.63 |
| 8 | 16234177 | 16249301 | 15124  | 0.11 |
| 8 | 16955323 | 16968788 | 13465  | 0.23 |
| 8 | 17517451 | 17521389 | 3938   | 0.11 |
| 8 | 20030532 | 20033265 | 2733   | 0.06 |
| 8 | 20273934 | 20279271 | 5337   | 0.06 |
| 8 | 21625742 | 21632426 | 6684   | 0.06 |
| 8 | 22648895 | 22650543 | 1648   | 0.06 |
| 8 | 23010653 | 23018472 | 7819   | 0.06 |
| 8 | 23163943 | 23171633 | 7690   | 0.06 |
| 8 | 23328054 | 23337415 | 9361   | 0.06 |
| 8 | 24755010 | 24792886 | 37876  | 0.06 |

SUPPLEMENTARY INFORMATION

|   |          |          |        |      |
|---|----------|----------|--------|------|
| 8 | 25138018 | 25153837 | 15819  | 0.06 |
| 8 | 26738756 | 26745756 | 7000   | 0.06 |
| 8 | 27786996 | 27837730 | 50734  | 0.34 |
| 8 | 28013819 | 28015631 | 1812   | 0.17 |
| 8 | 28528677 | 28551083 | 22406  | 0.06 |
| 8 | 28755207 | 28868516 | 113309 | 0.06 |
| 8 | 29296260 | 29314465 | 18205  | 0.06 |
| 8 | 29347956 | 29354552 | 6596   | 0.11 |
| 8 | 32624155 | 32639729 | 15574  | 0.06 |
| 8 | 33649392 | 33672581 | 23189  | 0.17 |
| 8 | 34229450 | 34232152 | 2702   | 0.06 |
| 8 | 34979499 | 34996980 | 17481  | 0.23 |
| 8 | 38531112 | 38543517 | 12405  | 0.06 |
| 8 | 39530806 | 39575057 | 44251  | 0.57 |
| 8 | 39939939 | 39942187 | 2248   | 0.06 |
| 8 | 40236785 | 40247392 | 10607  | 0.06 |
| 8 | 41373362 | 41394768 | 21406  | 0.17 |
| 8 | 48671213 | 48674415 | 3202   | 0.06 |
| 8 | 49961335 | 50047950 | 86615  | 0.11 |
| 8 | 51126804 | 51164696 | 37892  | 0.06 |
| 8 | 51342579 | 51347820 | 5241   | 0.06 |
| 8 | 51970749 | 52000640 | 29891  | 0.06 |
| 8 | 53050218 | 53079475 | 29257  | 0.29 |
| 8 | 54533052 | 54537711 | 4659   | 0.06 |
| 8 | 55076481 | 55092356 | 15875  | 0.06 |
| 8 | 55697708 | 55705643 | 7935   | 0.06 |
| 8 | 55822561 | 55855194 | 32633  | 0.17 |
| 8 | 56320228 | 56349376 | 29148  | 0.06 |
| 8 | 57361011 | 57435874 | 74863  | 0.11 |
| 8 | 57442391 | 57454399 | 12008  | 1.20 |
| 8 | 61125450 | 61138050 | 12600  | 0.11 |
| 8 | 62935739 | 62938350 | 2611   | 0.06 |
| 8 | 64019391 | 64068198 | 48807  | 0.06 |
| 8 | 64201538 | 64211314 | 9776   | 0.06 |
| 8 | 64329609 | 64343492 | 13883  | 0.40 |
| 8 | 65949957 | 65954892 | 4935   | 0.06 |
| 8 | 68474725 | 68483386 | 8661   | 0.06 |
| 8 | 68880306 | 68888591 | 8285   | 0.06 |
| 8 | 68959626 | 68963342 | 3716   | 0.11 |
| 8 | 69101020 | 69112887 | 11867  | 0.06 |
| 8 | 69523630 | 69541416 | 17786  | 0.11 |
| 8 | 69913749 | 69936479 | 22730  | 0.11 |
| 8 | 69945636 | 69951659 | 6023   | 0.17 |
| 8 | 69958621 | 69977897 | 19276  | 0.06 |
| 8 | 73091561 | 73107956 | 16395  | 0.06 |
| 8 | 73754834 | 73775124 | 20290  | 0.34 |

SUPPLEMENTARY INFORMATION

|   |           |           |        |      |
|---|-----------|-----------|--------|------|
| 8 | 73994494  | 73997501  | 3007   | 0.06 |
| 8 | 75183908  | 75198815  | 14907  | 0.11 |
| 8 | 75369081  | 75375177  | 6096   | 0.80 |
| 8 | 79146659  | 79170429  | 23770  | 0.06 |
| 8 | 79974940  | 79991372  | 16432  | 0.06 |
| 8 | 82455336  | 82505666  | 50330  | 0.06 |
| 8 | 82575960  | 82590515  | 14555  | 0.11 |
| 8 | 83569443  | 83733919  | 164476 | 0.06 |
| 8 | 83893419  | 83895573  | 2154   | 0.06 |
| 8 | 85331941  | 85348562  | 16621  | 0.06 |
| 8 | 85581363  | 85638247  | 56884  | 0.06 |
| 8 | 87372393  | 87420409  | 48016  | 0.06 |
| 8 | 87531678  | 87540883  | 9205   | 0.06 |
| 8 | 90919028  | 90925092  | 6064   | 0.06 |
| 8 | 93474648  | 93483277  | 8629   | 0.06 |
| 8 | 93634713  | 93641979  | 7266   | 0.06 |
| 8 | 96021609  | 96024415  | 2806   | 0.06 |
| 8 | 97743206  | 97766059  | 22853  | 0.23 |
| 8 | 97876925  | 97892501  | 15576  | 0.06 |
| 8 | 100639811 | 100644478 | 4667   | 0.06 |
| 8 | 100793919 | 100798618 | 4699   | 0.06 |
| 8 | 101375563 | 101391178 | 15615  | 0.40 |
| 8 | 102692268 | 102702998 | 10730  | 0.06 |
| 8 | 103802073 | 103826332 | 24259  | 0.11 |
| 8 | 104166011 | 104188506 | 22495  | 0.52 |
| 8 | 104712619 | 104723542 | 10923  | 0.06 |
| 8 | 109413035 | 109429113 | 16078  | 0.23 |
| 8 | 111786402 | 111789985 | 3583   | 0.11 |
| 8 | 112299542 | 112370163 | 70621  | 0.11 |
| 8 | 113792132 | 113795845 | 3713   | 0.06 |
| 8 | 114459900 | 114502591 | 42691  | 0.69 |
| 8 | 116319980 | 116322335 | 2355   | 0.06 |
| 8 | 118406037 | 118413471 | 7434   | 0.06 |
| 8 | 118676085 | 118682873 | 6788   | 0.40 |
| 8 | 121352478 | 121377669 | 25191  | 0.06 |
| 8 | 128216815 | 128221552 | 4737   | 0.11 |
| 8 | 128580289 | 128608229 | 27940  | 0.11 |
| 8 | 129101694 | 129119118 | 17424  | 0.17 |
| 8 | 129961819 | 129969662 | 7843   | 0.06 |
| 8 | 134113303 | 134115750 | 2447   | 0.06 |
| 8 | 134991415 | 134994387 | 2972   | 0.23 |
| 8 | 136673185 | 136849837 | 176652 | 1.20 |
| 8 | 137055377 | 137069047 | 13670  | 0.23 |
| 8 | 139546570 | 139577199 | 30629  | 0.11 |
| 8 | 140366882 | 140377822 | 10940  | 0.06 |
| 8 | 140613722 | 140617217 | 3495   | 0.06 |

SUPPLEMENTARY INFORMATION

|   |           |           |        |      |
|---|-----------|-----------|--------|------|
| 8 | 141012587 | 141049737 | 37150  | 0.06 |
| 8 | 141345643 | 141439595 | 93952  | 0.52 |
| 8 | 141474266 | 141492234 | 17968  | 0.17 |
| 8 | 141861270 | 141875272 | 14002  | 0.23 |
| 8 | 141993744 | 142025210 | 31466  | 0.11 |
| 8 | 142092622 | 142107190 | 14568  | 0.06 |
| 8 | 142522314 | 142537523 | 15209  | 0.63 |
| 8 | 143257962 | 143276889 | 18927  | 0.23 |
| 8 | 143427962 | 143466636 | 38674  | 0.06 |
| 8 | 143489261 | 143607119 | 117858 | 0.40 |
| 8 | 143904185 | 143957097 | 52912  | 0.52 |
| 8 | 143989660 | 144012715 | 23055  | 0.06 |
| 8 | 144040026 | 144105743 | 65717  | 0.23 |
| 8 | 144278821 | 144322373 | 43552  | 0.11 |
| 8 | 144383278 | 144458398 | 75120  | 0.40 |
| 8 | 144493267 | 144533863 | 40596  | 0.23 |
| 9 | 610771    | 705205    | 94434  | 0.34 |
| 9 | 790256    | 793816    | 3560   | 0.06 |
| 9 | 1189365   | 1197716   | 8351   | 0.06 |
| 9 | 1269555   | 1271596   | 2041   | 0.06 |
| 9 | 1427380   | 1428973   | 1593   | 0.06 |
| 9 | 2209802   | 2212574   | 2772   | 0.06 |
| 9 | 2403909   | 2421690   | 17781  | 0.06 |
| 9 | 2695208   | 2697695   | 2487   | 0.11 |
| 9 | 2840829   | 2848800   | 7971   | 0.06 |
| 9 | 3741545   | 3763952   | 22407  | 0.06 |
| 9 | 4362167   | 4385225   | 23058  | 0.06 |
| 9 | 4455607   | 4458374   | 2767   | 0.06 |
| 9 | 4671409   | 4793033   | 121624 | 0.11 |
| 9 | 5108334   | 5130363   | 22029  | 0.06 |
| 9 | 5304951   | 5337542   | 32591  | 0.86 |
| 9 | 5674203   | 5693620   | 19417  | 0.29 |
| 9 | 6399107   | 6401105   | 1998   | 0.06 |
| 9 | 6610588   | 6641859   | 31271  | 0.06 |
| 9 | 7732981   | 7772350   | 39369  | 0.11 |
| 9 | 8905119   | 9032105   | 126986 | 0.11 |
| 9 | 9878200   | 10010764  | 132564 | 0.29 |
| 9 | 10081387  | 10091133  | 9746   | 0.06 |
| 9 | 10170874  | 10180371  | 9497   | 0.06 |
| 9 | 10279866  | 10285562  | 5696   | 0.23 |
| 9 | 10371281  | 10374460  | 3179   | 0.06 |
| 9 | 10546814  | 10592572  | 45758  | 0.29 |
| 9 | 10704801  | 10710144  | 5343   | 0.06 |
| 9 | 10909144  | 10936687  | 27543  | 0.06 |
| 9 | 11155468  | 11160884  | 5416   | 0.06 |
| 9 | 11353760  | 11381692  | 27932  | 0.06 |

SUPPLEMENTARY INFORMATION

|   |          |          |        |      |
|---|----------|----------|--------|------|
| 9 | 11640367 | 12182768 | 542401 | 2.70 |
| 9 | 12298181 | 12456576 | 158395 | 0.29 |
| 9 | 12494501 | 12565444 | 70943  | 0.06 |
| 9 | 12727189 | 12749459 | 22270  | 0.06 |
| 9 | 13791532 | 13803516 | 11984  | 0.06 |
| 9 | 13815722 | 13887707 | 71985  | 0.11 |
| 9 | 15304437 | 15405298 | 100861 | 0.11 |
| 9 | 16907143 | 16912535 | 5392   | 0.06 |
| 9 | 17307206 | 17334077 | 26871  | 0.11 |
| 9 | 17402131 | 17406621 | 4490   | 0.57 |
| 9 | 17810305 | 17900506 | 90201  | 0.06 |
| 9 | 18589750 | 18595550 | 5800   | 0.06 |
| 9 | 19253270 | 19336325 | 83055  | 0.40 |
| 9 | 19736873 | 19740885 | 4012   | 0.06 |
| 9 | 19861137 | 19875940 | 14803  | 0.11 |
| 9 | 20669941 | 20681079 | 11138  | 0.06 |
| 9 | 21193861 | 21226833 | 32972  | 0.57 |
| 9 | 21599221 | 21610098 | 10877  | 0.06 |
| 9 | 22364081 | 22366793 | 2712   | 0.06 |
| 9 | 22572194 | 22594968 | 22774  | 0.11 |
| 9 | 22923906 | 22929104 | 5198   | 0.17 |
| 9 | 23125852 | 23159742 | 33890  | 0.06 |
| 9 | 23290143 | 23299153 | 9010   | 0.11 |
| 9 | 23935424 | 23948630 | 13206  | 0.06 |
| 9 | 24329958 | 24343371 | 13413  | 0.11 |
| 9 | 25249934 | 25352203 | 102269 | 0.57 |
| 9 | 25559758 | 25584046 | 24288  | 0.17 |
| 9 | 26275966 | 26305948 | 29982  | 0.06 |
| 9 | 26343790 | 26357955 | 14165  | 0.11 |
| 9 | 26550672 | 26562766 | 12094  | 0.06 |
| 9 | 26874345 | 26885992 | 11647  | 0.17 |
| 9 | 27800009 | 27807541 | 7532   | 0.17 |
| 9 | 28183433 | 28195208 | 11775  | 0.11 |
| 9 | 28309790 | 28348135 | 38345  | 0.17 |
| 9 | 28542805 | 28661684 | 118879 | 0.34 |
| 9 | 28672394 | 28776754 | 104360 | 1.32 |
| 9 | 29539149 | 29544134 | 4985   | 0.06 |
| 9 | 30175190 | 30310100 | 134910 | 0.11 |
| 9 | 31405319 | 31453234 | 47915  | 0.11 |
| 9 | 32170495 | 32172342 | 1847   | 0.11 |
| 9 | 33462097 | 33467985 | 5888   | 0.11 |
| 9 | 33845081 | 33914360 | 69279  | 0.46 |
| 9 | 35982824 | 35993379 | 10555  | 0.11 |
| 9 | 36135427 | 36147874 | 12447  | 0.06 |
| 9 | 37394545 | 37396261 | 1716   | 0.06 |
| 9 | 38386354 | 38389540 | 3186   | 0.06 |

SUPPLEMENTARY INFORMATION

|   |           |           |       |      |
|---|-----------|-----------|-------|------|
| 9 | 66894081  | 66938489  | 44408 | 0.06 |
| 9 | 68746911  | 68750097  | 3186  | 0.06 |
| 9 | 71151555  | 71155980  | 4425  | 0.23 |
| 9 | 71870540  | 71872536  | 1996  | 0.11 |
| 9 | 72064358  | 72089308  | 24950 | 0.46 |
| 9 | 74888019  | 74902569  | 14550 | 0.06 |
| 9 | 76535611  | 76545077  | 9466  | 0.11 |
| 9 | 77261966  | 77321718  | 59752 | 0.06 |
| 9 | 77458300  | 77463600  | 5300  | 0.06 |
| 9 | 77595834  | 77603316  | 7482  | 0.06 |
| 9 | 78097650  | 78103095  | 5445  | 0.06 |
| 9 | 78823393  | 78850088  | 26695 | 0.17 |
| 9 | 79034093  | 79038982  | 4889  | 0.06 |
| 9 | 85724372  | 85727723  | 3351  | 0.06 |
| 9 | 89310312  | 89312318  | 2006  | 0.06 |
| 9 | 92965601  | 92975367  | 9766  | 0.29 |
| 9 | 93113165  | 93138214  | 25049 | 0.11 |
| 9 | 97321004  | 97328667  | 7663  | 0.06 |
| 9 | 101899463 | 101910706 | 11243 | 0.11 |
| 9 | 102017404 | 102019814 | 2410  | 0.06 |
| 9 | 102349016 | 102366836 | 17820 | 0.46 |
| 9 | 102669637 | 102678641 | 9004  | 0.17 |
| 9 | 103005945 | 103023251 | 17306 | 1.20 |
| 9 | 103084214 | 103111246 | 27032 | 0.29 |
| 9 | 103616197 | 103627049 | 10852 | 0.17 |
| 9 | 103779694 | 103793832 | 14138 | 0.06 |
| 9 | 103954708 | 103958400 | 3692  | 1.32 |
| 9 | 104610357 | 104622668 | 12311 | 0.46 |
| 9 | 110021284 | 110034605 | 13321 | 0.06 |
| 9 | 111261915 | 111272550 | 10635 | 0.11 |
| 9 | 111702207 | 111707858 | 5651  | 1.09 |
| 9 | 112248160 | 112258135 | 9975  | 0.06 |
| 9 | 112894766 | 112900864 | 6098  | 0.06 |
| 9 | 113003798 | 113009320 | 5522  | 0.11 |
| 9 | 114247463 | 114265429 | 17966 | 0.11 |
| 9 | 115017389 | 115019496 | 2107  | 0.06 |
| 9 | 115310805 | 115321587 | 10782 | 0.17 |
| 9 | 116746516 | 116749852 | 3336  | 0.06 |
| 9 | 118415803 | 118494757 | 78954 | 0.11 |
| 9 | 119530014 | 119542304 | 12290 | 0.17 |
| 9 | 119880516 | 119886403 | 5887  | 0.06 |
| 9 | 122566586 | 122568460 | 1874  | 0.17 |
| 9 | 123416415 | 123435342 | 18927 | 0.06 |
| 9 | 124162723 | 124165294 | 2571  | 0.06 |
| 9 | 124836861 | 124857643 | 20782 | 0.40 |
| 9 | 125420699 | 125438143 | 17444 | 0.52 |



SUPPLEMENTARY INFORMATION

|    |           |           |        |      |
|----|-----------|-----------|--------|------|
| 9  | 126699041 | 126706307 | 7266   | 0.11 |
| 9  | 126777727 | 126785408 | 7681   | 0.06 |
| 9  | 127549801 | 127558278 | 8477   | 0.06 |
| 9  | 129287563 | 129292175 | 4612   | 0.06 |
| 9  | 129769341 | 129779207 | 9866   | 0.34 |
| 9  | 130886229 | 130906229 | 20000  | 0.75 |
| 9  | 132439243 | 132447209 | 7966   | 0.06 |
| 9  | 133034308 | 133038096 | 3788   | 0.23 |
| 9  | 133708289 | 133736268 | 27979  | 0.34 |
| 9  | 133763269 | 133810892 | 47623  | 0.40 |
| 9  | 133951218 | 133981075 | 29857  | 0.34 |
| 9  | 134029242 | 134033114 | 3872   | 0.11 |
| 9  | 134233655 | 134239683 | 6028   | 0.06 |
| 9  | 134340689 | 134376145 | 35456  | 0.06 |
| 9  | 134706412 | 134710273 | 3861   | 0.52 |
| 9  | 134750731 | 134786460 | 35729  | 0.92 |
| 9  | 134848652 | 134855500 | 6848   | 0.06 |
| 9  | 134966572 | 135003508 | 36936  | 0.17 |
| 9  | 135243499 | 135258742 | 15243  | 0.11 |
| 9  | 135384508 | 135402312 | 17804  | 0.63 |
| 9  | 135680873 | 135705128 | 24255  | 0.11 |
| 9  | 135797454 | 135800141 | 2687   | 0.11 |
| 9  | 136250450 | 136266613 | 16163  | 0.11 |
| 9  | 139165990 | 139297002 | 131012 | 0.46 |
| 9  | 136681035 | 136723533 | 42498  | 0.40 |
| 9  | 136739095 | 136740232 | 1137   | 0.06 |
| 9  | 136754269 | 136860923 | 106654 | 0.29 |
| 9  | 136936335 | 136984718 | 48383  | 0.23 |
| 9  | 137156924 | 137294126 | 137202 | 0.29 |
| 9  | 137403232 | 137467395 | 64163  | 0.40 |
| 10 | 555091    | 599976    | 44885  | 0.11 |
| 10 | 772409    | 792239    | 19830  | 0.40 |
| 10 | 940944    | 944216    | 3272   | 0.06 |
| 10 | 954440    | 972645    | 18205  | 0.06 |
| 10 | 2122824   | 2131168   | 8344   | 0.06 |
| 10 | 2833600   | 2835590   | 1990   | 0.29 |
| 10 | 2958497   | 2961645   | 3148   | 0.17 |
| 10 | 3728688   | 3730738   | 2050   | 0.06 |
| 10 | 4411120   | 4417857   | 6737   | 0.06 |
| 10 | 5371671   | 5377657   | 5986   | 0.17 |
| 10 | 5861874   | 5863298   | 1424   | 0.11 |
| 10 | 6166502   | 6173294   | 6792   | 0.06 |
| 10 | 6392942   | 6400186   | 7244   | 0.06 |
| 10 | 6647709   | 6651049   | 3340   | 0.06 |
| 10 | 7625841   | 7627589   | 1748   | 0.11 |
| 10 | 8268018   | 8280868   | 12850  | 0.23 |

SUPPLEMENTARY INFORMATION

|    |          |          |        |      |
|----|----------|----------|--------|------|
| 10 | 9378393  | 9539963  | 161570 | 0.06 |
| 10 | 10614388 | 10618875 | 4487   | 0.40 |
| 10 | 12299476 | 12312071 | 12595  | 0.11 |
| 10 | 12578764 | 12592838 | 14074  | 0.06 |
| 10 | 12996207 | 13005437 | 9230   | 0.06 |
| 10 | 13070869 | 13086941 | 16072  | 0.06 |
| 10 | 14443206 | 14446968 | 3762   | 0.06 |
| 10 | 14946306 | 15021039 | 74733  | 0.06 |
| 10 | 15045474 | 15055617 | 10143  | 0.11 |
| 10 | 15410760 | 15413884 | 3124   | 0.06 |
| 10 | 16326089 | 16329769 | 3680   | 0.06 |
| 10 | 18964709 | 18969220 | 4511   | 0.06 |
| 10 | 19061551 | 19072671 | 11120  | 0.06 |
| 10 | 19134993 | 19139714 | 4721   | 0.06 |
| 10 | 19205064 | 19207887 | 2823   | 0.11 |
| 10 | 19465954 | 19474558 | 8604   | 0.06 |
| 10 | 20543783 | 20555017 | 11234  | 0.06 |
| 10 | 22903481 | 22911565 | 8084   | 0.06 |
| 10 | 24315764 | 24317924 | 2160   | 0.06 |
| 10 | 25867799 | 25869661 | 1862   | 0.11 |
| 10 | 26395163 | 26402038 | 6875   | 2.47 |
| 10 | 27318130 | 27418262 | 100132 | 0.92 |
| 10 | 29819631 | 29823042 | 3411   | 0.06 |
| 10 | 30253136 | 30342382 | 89246  | 0.63 |
| 10 | 30704185 | 30706090 | 1905   | 0.06 |
| 10 | 31218512 | 31255800 | 37288  | 0.29 |
| 10 | 31683454 | 31688402 | 4948   | 0.06 |
| 10 | 31880495 | 31901768 | 21273  | 0.06 |
| 10 | 33129089 | 33132620 | 3531   | 0.06 |
| 10 | 33719528 | 33732937 | 13409  | 0.06 |
| 10 | 33909083 | 33915175 | 6092   | 0.86 |
| 10 | 34961141 | 34967251 | 6110   | 0.06 |
| 10 | 35184557 | 35189199 | 4642   | 0.06 |
| 10 | 35887518 | 35888707 | 1189   | 0.06 |
| 10 | 36648634 | 36653166 | 4532   | 0.34 |
| 10 | 42876813 | 42879460 | 2647   | 0.29 |
| 10 | 43040089 | 43050719 | 10630  | 0.29 |
| 10 | 44915523 | 44917339 | 1816   | 0.29 |
| 10 | 45417323 | 45425396 | 8073   | 0.69 |
| 10 | 47348233 | 47357676 | 9443   | 0.52 |
| 10 | 49797741 | 49818810 | 21069  | 0.06 |
| 10 | 51512034 | 51535254 | 23220  | 0.17 |
| 10 | 51667587 | 51835743 | 168156 | 0.06 |
| 10 | 52784801 | 52790014 | 5213   | 0.63 |
| 10 | 52804603 | 52809080 | 4477   | 0.23 |
| 10 | 53167918 | 53177475 | 9557   | 1.61 |

SUPPLEMENTARY INFORMATION

|    |          |          |        |      |
|----|----------|----------|--------|------|
| 10 | 53614714 | 53697548 | 82834  | 0.52 |
| 10 | 54325198 | 54327724 | 2526   | 0.06 |
| 10 | 54672482 | 54678648 | 6166   | 0.11 |
| 10 | 54760682 | 54782480 | 21798  | 0.57 |
| 10 | 55099774 | 55361364 | 261590 | 1.89 |
| 10 | 56775534 | 56786401 | 10867  | 0.06 |
| 10 | 57153439 | 57177179 | 23740  | 0.06 |
| 10 | 57415380 | 57486056 | 70676  | 0.46 |
| 10 | 58327865 | 58334514 | 6649   | 0.06 |
| 10 | 58868392 | 58871775 | 3383   | 0.06 |
| 10 | 60644471 | 60686460 | 41989  | 0.11 |
| 10 | 61407115 | 61408730 | 1615   | 0.11 |
| 10 | 61872165 | 61901581 | 29416  | 0.06 |
| 10 | 62234146 | 62247845 | 13699  | 0.06 |
| 10 | 64488054 | 64605163 | 117109 | 0.29 |
| 10 | 65281992 | 65290053 | 8061   | 0.06 |
| 10 | 65501436 | 65561243 | 59807  | 0.11 |
| 10 | 65567286 | 65584273 | 16987  | 0.29 |
| 10 | 66226903 | 66239347 | 12444  | 0.06 |
| 10 | 66315274 | 66354723 | 39449  | 0.23 |
| 10 | 66587307 | 66614538 | 27231  | 0.29 |
| 10 | 66731037 | 66779762 | 48725  | 0.06 |
| 10 | 67782114 | 67790109 | 7995   | 0.06 |
| 10 | 67854694 | 67867031 | 12337  | 0.06 |
| 10 | 68655758 | 68814077 | 158319 | 0.34 |
| 10 | 69579777 | 69587520 | 7743   | 0.06 |
| 10 | 70291636 | 70305220 | 13584  | 0.06 |
| 10 | 70977472 | 70983556 | 6084   | 0.11 |
| 10 | 71691619 | 71705276 | 13657  | 0.34 |
| 10 | 71727260 | 71738658 | 11398  | 0.17 |
| 10 | 72441913 | 72466597 | 24684  | 0.06 |
| 10 | 72561296 | 72712397 | 151101 | 0.17 |
| 10 | 72971840 | 72988124 | 16284  | 0.06 |
| 10 | 74048555 | 74057306 | 8751   | 0.06 |
| 10 | 74997649 | 75002230 | 4581   | 0.06 |
| 10 | 77573606 | 77581976 | 8370   | 0.06 |
| 10 | 78560093 | 78562342 | 2249   | 0.06 |
| 10 | 79146974 | 79160613 | 13639  | 0.23 |
| 10 | 81425343 | 81429197 | 3854   | 0.11 |
| 10 | 83866801 | 83869011 | 2210   | 0.11 |
| 10 | 84127298 | 84129173 | 1875   | 0.06 |
| 10 | 84981663 | 84987932 | 6269   | 0.11 |
| 10 | 85396496 | 85402491 | 5995   | 0.06 |
| 10 | 86191929 | 86199806 | 7877   | 0.34 |
| 10 | 86570177 | 86576522 | 6345   | 0.17 |
| 10 | 86653055 | 86663766 | 10711  | 1.03 |

SUPPLEMENTARY INFORMATION

|    |           |           |        |      |
|----|-----------|-----------|--------|------|
| 10 | 86690301  | 86709830  | 19529  | 0.17 |
| 10 | 88643669  | 88646694  | 3025   | 0.06 |
| 10 | 90237985  | 90242355  | 4370   | 1.89 |
| 10 | 90556058  | 90588307  | 32249  | 0.06 |
| 10 | 90632615  | 90636363  | 3748   | 0.34 |
| 10 | 92897184  | 92999191  | 102007 | 0.23 |
| 10 | 93276818  | 93281804  | 4986   | 0.17 |
| 10 | 93923695  | 93935118  | 11423  | 0.06 |
| 10 | 93939246  | 93946277  | 7031   | 0.11 |
| 10 | 94408644  | 94535408  | 126764 | 0.17 |
| 10 | 94552250  | 94589459  | 37209  | 0.06 |
| 10 | 94820579  | 94839728  | 19149  | 0.29 |
| 10 | 95666329  | 95679583  | 13254  | 0.11 |
| 10 | 96396435  | 96404312  | 7877   | 0.11 |
| 10 | 98017502  | 98021308  | 3806   | 0.11 |
| 10 | 98819421  | 98826879  | 7458   | 0.06 |
| 10 | 98944840  | 99151606  | 206766 | 0.23 |
| 10 | 101966097 | 101973867 | 7770   | 0.06 |
| 10 | 102064329 | 102072932 | 8603   | 0.06 |
| 10 | 103244899 | 103253390 | 8491   | 0.06 |
| 10 | 103956782 | 103960346 | 3564   | 0.57 |
| 10 | 105013239 | 105017323 | 4084   | 0.06 |
| 10 | 106224562 | 106257058 | 32496  | 0.23 |
| 10 | 107423589 | 107431701 | 8112   | 0.06 |
| 10 | 108499676 | 108504409 | 4733   | 0.11 |
| 10 | 108543367 | 108557547 | 14180  | 2.75 |
| 10 | 108673885 | 108791347 | 117462 | 0.06 |
| 10 | 109526451 | 109642134 | 115683 | 0.29 |
| 10 | 111146915 | 111149811 | 2896   | 0.06 |
| 10 | 112375255 | 112380138 | 4883   | 0.06 |
| 10 | 112591242 | 112616199 | 24957  | 0.06 |
| 10 | 113334636 | 113339164 | 4528   | 0.11 |
| 10 | 113449709 | 113456619 | 6910   | 0.29 |
| 10 | 113560739 | 113564855 | 4116   | 0.06 |
| 10 | 114284828 | 114288999 | 4171   | 0.06 |
| 10 | 114728886 | 114730510 | 1624   | 0.17 |
| 10 | 117259666 | 117261896 | 2230   | 0.06 |
| 10 | 120838827 | 120841959 | 3132   | 0.06 |
| 10 | 122027395 | 122073742 | 46347  | 0.06 |
| 10 | 122563296 | 122570194 | 6898   | 0.11 |
| 10 | 123460305 | 123465648 | 5343   | 0.23 |
| 10 | 124705138 | 124706575 | 1437   | 0.06 |
| 10 | 124886641 | 124887889 | 1248   | 0.06 |
| 10 | 127290113 | 127292384 | 2271   | 0.06 |
| 10 | 127786137 | 127792810 | 6673   | 0.11 |
| 10 | 127854190 | 127856744 | 2554   | 0.06 |

SUPPLEMENTARY INFORMATION

|    |           |           |       |      |
|----|-----------|-----------|-------|------|
| 10 | 128433593 | 128468423 | 34830 | 0.40 |
| 10 | 128497770 | 128499803 | 2033  | 0.11 |
| 10 | 128860638 | 128863076 | 2438  | 0.06 |
| 10 | 128886520 | 128889231 | 2711  | 0.57 |
| 10 | 130625651 | 130630920 | 5269  | 0.06 |
| 10 | 131284394 | 131286729 | 2335  | 0.06 |
| 10 | 131811600 | 131834476 | 22876 | 0.80 |
| 10 | 132399071 | 132404671 | 5600  | 0.06 |
| 10 | 132952715 | 132964785 | 12070 | 0.06 |
| 11 | 1021268   | 1039867   | 18599 | 0.86 |
| 11 | 1398381   | 1473478   | 75097 | 0.40 |
| 11 | 1691875   | 1695519   | 3644  | 0.11 |
| 11 | 1828103   | 1839194   | 11091 | 0.29 |
| 11 | 1916508   | 1938477   | 21969 | 0.46 |
| 11 | 1956322   | 1992578   | 36256 | 0.40 |
| 11 | 2011460   | 2052683   | 41223 | 0.40 |
| 11 | 2572418   | 2598160   | 25742 | 0.34 |
| 11 | 3721816   | 3758858   | 37042 | 0.06 |
| 11 | 4529499   | 4613512   | 84013 | 0.06 |
| 11 | 5044857   | 5051871   | 7014  | 0.17 |
| 11 | 5166403   | 5242219   | 75816 | 0.11 |
| 11 | 5844060   | 5869835   | 25775 | 8.95 |
| 11 | 6029735   | 6033321   | 3586  | 0.11 |
| 11 | 6167854   | 6172535   | 4681  | 0.46 |
| 11 | 7664187   | 7667798   | 3611  | 0.06 |
| 11 | 9929710   | 9952203   | 22493 | 0.06 |
| 11 | 10204325  | 10208304  | 3979  | 0.17 |
| 11 | 10788216  | 10792475  | 4259  | 0.06 |
| 11 | 11280317  | 11283961  | 3644  | 0.29 |
| 11 | 11688989  | 11691497  | 2508  | 0.06 |
| 11 | 12001351  | 12019425  | 18074 | 0.06 |
| 11 | 12240209  | 12253318  | 13109 | 0.11 |
| 11 | 15787749  | 15795202  | 7453  | 0.52 |
| 11 | 16615915  | 16620664  | 4749  | 0.06 |
| 11 | 17040907  | 17067458  | 26551 | 0.06 |
| 11 | 17189928  | 17211641  | 21713 | 0.06 |
| 11 | 17276116  | 17319323  | 43207 | 0.52 |
| 11 | 17465190  | 17469839  | 4649  | 0.34 |
| 11 | 17473504  | 17476247  | 2743  | 0.06 |
| 11 | 17574766  | 17579672  | 4906  | 0.06 |
| 11 | 18418191  | 18439631  | 21440 | 0.06 |
| 11 | 18587464  | 18598500  | 11036 | 0.11 |
| 11 | 19470467  | 19473068  | 2601  | 0.11 |
| 11 | 19516616  | 19519240  | 2624  | 0.06 |
| 11 | 20168561  | 20172250  | 3689  | 0.06 |
| 11 | 21401554  | 21403830  | 2276  | 0.34 |

SUPPLEMENTARY INFORMATION

|    |          |          |        |      |
|----|----------|----------|--------|------|
| 11 | 21589423 | 21689672 | 100249 | 0.11 |
| 11 | 21926854 | 21934370 | 7516   | 0.06 |
| 11 | 24756913 | 24772778 | 15865  | 0.17 |
| 11 | 25101610 | 25274527 | 172917 | 0.34 |
| 11 | 25564364 | 25909715 | 345351 | 6.71 |
| 11 | 26141695 | 26223246 | 81551  | 0.11 |
| 11 | 26445513 | 26449563 | 4050   | 0.06 |
| 11 | 29885611 | 29888267 | 2656   | 0.06 |
| 11 | 31261830 | 31328261 | 66431  | 0.06 |
| 11 | 32669110 | 32724730 | 55620  | 0.06 |
| 11 | 33274045 | 33305645 | 31600  | 0.06 |
| 11 | 33361672 | 33371690 | 10018  | 0.06 |
| 11 | 33442721 | 33448334 | 5613   | 0.17 |
| 11 | 35762736 | 35769162 | 6426   | 0.06 |
| 11 | 37384393 | 37444223 | 59830  | 0.06 |
| 11 | 38434461 | 38448427 | 13966  | 0.11 |
| 11 | 38692233 | 38699680 | 7447   | 0.11 |
| 11 | 38953954 | 38962239 | 8285   | 0.06 |
| 11 | 39823594 | 39829738 | 6144   | 0.06 |
| 11 | 40166146 | 40167681 | 1535   | 0.06 |
| 11 | 40434450 | 40673841 | 239391 | 0.06 |
| 11 | 40931136 | 40947628 | 16492  | 0.17 |
| 11 | 40950364 | 40963951 | 13587  | 0.06 |
| 11 | 41117280 | 41119257 | 1977   | 0.06 |
| 11 | 42651474 | 42658769 | 7295   | 0.06 |
| 11 | 44064106 | 44085637 | 21531  | 0.06 |
| 11 | 45434750 | 45463891 | 29141  | 0.06 |
| 11 | 47625686 | 47756344 | 130658 | 0.29 |
| 11 | 47864812 | 47869782 | 4970   | 0.06 |
| 11 | 47873486 | 47903136 | 29650  | 0.06 |
| 11 | 49066286 | 49082234 | 15948  | 0.06 |
| 11 | 50135103 | 50162831 | 27728  | 0.11 |
| 11 | 57876022 | 57882668 | 6646   | 0.06 |
| 11 | 58691939 | 58704038 | 12099  | 0.06 |
| 11 | 59322956 | 59416719 | 93763  | 0.11 |
| 11 | 60135814 | 60216381 | 80567  | 0.06 |
| 11 | 62032773 | 62039584 | 6811   | 0.06 |
| 11 | 63015678 | 63018963 | 3285   | 0.06 |
| 11 | 63043086 | 63052586 | 9500   | 0.11 |
| 11 | 63095244 | 63104202 | 8958   | 0.06 |
| 11 | 63715719 | 63793381 | 77662  | 0.57 |
| 11 | 67269719 | 67307660 | 37941  | 0.06 |
| 11 | 68233112 | 68248727 | 15615  | 0.11 |
| 11 | 68463378 | 68580664 | 117286 | 0.06 |
| 11 | 69001614 | 69018191 | 16577  | 0.17 |
| 11 | 69189889 | 69197569 | 7680   | 0.06 |

SUPPLEMENTARY INFORMATION

|    |           |           |        |      |
|----|-----------|-----------|--------|------|
| 11 | 74912966  | 74918138  | 5172   | 0.06 |
| 11 | 75545077  | 75549603  | 4526   | 0.06 |
| 11 | 76256797  | 76258705  | 1908   | 0.23 |
| 11 | 76659111  | 76668862  | 9751   | 0.23 |
| 11 | 76705616  | 76710987  | 5371   | 0.40 |
| 11 | 76764986  | 76797895  | 32909  | 0.46 |
| 11 | 77084793  | 77129979  | 45186  | 0.40 |
| 11 | 77177028  | 77208958  | 31930  | 1.26 |
| 11 | 78563123  | 78569277  | 6154   | 0.06 |
| 11 | 78647378  | 78656369  | 8991   | 0.06 |
| 11 | 79470559  | 79472758  | 2199   | 0.06 |
| 11 | 81272336  | 81306084  | 33748  | 0.52 |
| 11 | 82141468  | 82365345  | 223877 | 0.46 |
| 11 | 83109241  | 83112694  | 3453   | 0.06 |
| 11 | 83821792  | 83826348  | 4556   | 0.23 |
| 11 | 83849843  | 83862732  | 12889  | 0.06 |
| 11 | 84829533  | 84859671  | 30138  | 0.11 |
| 11 | 86859657  | 86862268  | 2611   | 0.23 |
| 11 | 87196551  | 87288398  | 91847  | 0.06 |
| 11 | 87500295  | 87509297  | 9002   | 0.06 |
| 11 | 87675905  | 87743887  | 67982  | 2.35 |
| 11 | 90264804  | 90279378  | 14574  | 0.06 |
| 11 | 90639468  | 90642337  | 2869   | 0.17 |
| 11 | 90849053  | 90856784  | 7731   | 0.17 |
| 11 | 91104348  | 91110121  | 5773   | 0.06 |
| 11 | 91350940  | 91360177  | 9237   | 0.06 |
| 11 | 91471433  | 91473860  | 2427   | 0.06 |
| 11 | 91542597  | 91548007  | 5410   | 0.06 |
| 11 | 92374030  | 92380283  | 6253   | 0.06 |
| 11 | 93780364  | 93789452  | 9088   | 0.17 |
| 11 | 95030873  | 95052339  | 21466  | 0.06 |
| 11 | 95129413  | 95132889  | 3476   | 0.06 |
| 11 | 95442698  | 95447515  | 4817   | 0.11 |
| 11 | 96246170  | 96247903  | 1733   | 0.06 |
| 11 | 96647886  | 96652386  | 4500   | 0.06 |
| 11 | 97103708  | 97177557  | 73849  | 0.23 |
| 11 | 97622333  | 97623612  | 1279   | 0.06 |
| 11 | 99215531  | 99225748  | 10217  | 0.06 |
| 11 | 99650260  | 99698597  | 48337  | 0.06 |
| 11 | 100263076 | 100284669 | 21593  | 0.06 |
| 11 | 100565963 | 100573792 | 7829   | 0.06 |
| 11 | 100912798 | 100916480 | 3682   | 0.17 |
| 11 | 101970244 | 102022191 | 51947  | 0.06 |
| 11 | 102630934 | 102635854 | 4920   | 0.29 |
| 11 | 103284025 | 103287549 | 3524   | 0.06 |
| 11 | 105053115 | 105060146 | 7031   | 4.19 |

SUPPLEMENTARY INFORMATION

|    |           |           |        |      |
|----|-----------|-----------|--------|------|
| 11 | 105074180 | 105100635 | 26455  | 0.06 |
| 11 | 105179726 | 105196983 | 17257  | 0.29 |
| 11 | 106523477 | 106533881 | 10404  | 0.29 |
| 11 | 114297215 | 114303113 | 5898   | 0.17 |
| 11 | 114533054 | 114734835 | 201781 | 0.63 |
| 11 | 117013903 | 117036397 | 22494  | 0.06 |
| 11 | 117437716 | 117443604 | 5888   | 0.11 |
| 11 | 121999668 | 122030128 | 30460  | 1.26 |
| 11 | 124829565 | 124836588 | 7023   | 0.06 |
| 11 | 125204606 | 125213355 | 8749   | 0.23 |
| 11 | 125946544 | 125953802 | 7258   | 0.06 |
| 11 | 126963459 | 126979625 | 16166  | 0.06 |
| 11 | 128155371 | 128157904 | 2533   | 0.11 |
| 11 | 130462844 | 130468110 | 5266   | 0.06 |
| 11 | 131332741 | 131334995 | 2254   | 0.06 |
| 11 | 134282136 | 134344486 | 62350  | 0.11 |
| 12 | 1825242   | 1828635   | 3393   | 0.06 |
| 12 | 2136728   | 2150500   | 13772  | 1.43 |
| 12 | 3739945   | 3751056   | 11111  | 0.06 |
| 12 | 4820934   | 4846304   | 25370  | 0.11 |
| 12 | 5133635   | 5137125   | 3490   | 0.06 |
| 12 | 5957143   | 6017761   | 60618  | 0.06 |
| 12 | 6216522   | 6218947   | 2425   | 0.17 |
| 12 | 6249028   | 6254134   | 5106   | 0.06 |
| 12 | 7565506   | 7568485   | 2979   | 0.57 |
| 12 | 7662594   | 7725063   | 62469  | 0.46 |
| 12 | 7728764   | 7806996   | 78232  | 0.29 |
| 12 | 8738931   | 8745367   | 6436   | 0.06 |
| 12 | 8858075   | 8861159   | 3084   | 0.17 |
| 12 | 9806553   | 9808919   | 2366   | 0.11 |
| 12 | 9825309   | 9833901   | 8592   | 0.06 |
| 12 | 9879456   | 9881871   | 2415   | 0.06 |
| 12 | 12297598  | 12301714  | 4116   | 0.06 |
| 12 | 13483242  | 13492480  | 9238   | 0.06 |
| 12 | 13721333  | 13724496  | 3163   | 0.06 |
| 12 | 13933200  | 13937502  | 4302   | 0.06 |
| 12 | 14431165  | 14454787  | 23622  | 0.11 |
| 12 | 15415250  | 15421148  | 5898   | 1.09 |
| 12 | 17230728  | 17233424  | 2696   | 0.06 |
| 12 | 18232372  | 18239955  | 7583   | 0.40 |
| 12 | 19762074  | 19770824  | 8750   | 0.11 |
| 12 | 20864745  | 20881992  | 17247  | 0.11 |
| 12 | 21355623  | 21366821  | 11198  | 0.06 |
| 12 | 21783449  | 21798119  | 14670  | 0.06 |
| 12 | 21978568  | 21987430  | 8862   | 0.06 |
| 12 | 21996011  | 21997869  | 1858   | 0.06 |



SUPPLEMENTARY INFORMATION

|    |          |          |        |      |
|----|----------|----------|--------|------|
| 12 | 22461495 | 22484740 | 23245  | 0.17 |
| 12 | 22714010 | 22718726 | 4716   | 0.17 |
| 12 | 23001521 | 23004537 | 3016   | 0.06 |
| 12 | 25495742 | 25501520 | 5778   | 0.06 |
| 12 | 25982029 | 25986589 | 4560   | 0.23 |
| 12 | 28858243 | 28862986 | 4743   | 0.46 |
| 12 | 29663372 | 29667982 | 4610   | 0.06 |
| 12 | 30960466 | 30961636 | 1170   | 0.40 |
| 12 | 31352080 | 31358268 | 6188   | 0.11 |
| 12 | 31382587 | 31383606 | 1019   | 0.46 |
| 12 | 31747816 | 31761490 | 13674  | 0.06 |
| 12 | 31899488 | 31923920 | 24432  | 0.57 |
| 12 | 32382881 | 32432643 | 49762  | 0.06 |
| 12 | 39425100 | 39431811 | 6711   | 0.06 |
| 12 | 40213764 | 40218182 | 4418   | 0.06 |
| 12 | 40426199 | 40427374 | 1175   | 0.11 |
| 12 | 40789198 | 40791489 | 2291   | 0.06 |
| 12 | 41102837 | 41121790 | 18953  | 0.11 |
| 12 | 43535318 | 43541196 | 5878   | 0.06 |
| 12 | 45104610 | 45131928 | 27318  | 0.06 |
| 12 | 48326356 | 48345229 | 18873  | 0.06 |
| 12 | 49339765 | 49348866 | 9101   | 0.06 |
| 12 | 49522157 | 49526612 | 4455   | 0.06 |
| 12 | 49544030 | 49563158 | 19128  | 0.06 |
| 12 | 50942186 | 50950271 | 8085   | 0.06 |
| 12 | 52000827 | 52010834 | 10007  | 0.06 |
| 12 | 52372779 | 52378665 | 5886   | 0.06 |
| 12 | 54480686 | 54492905 | 12219  | 0.29 |
| 12 | 54596339 | 54602111 | 5772   | 0.11 |
| 12 | 54909029 | 54917297 | 8268   | 0.06 |
| 12 | 55087817 | 55096074 | 8257   | 0.06 |
| 12 | 55514501 | 55530240 | 15739  | 0.75 |
| 12 | 56514114 | 56583666 | 69552  | 0.29 |
| 12 | 56748008 | 56764726 | 16718  | 0.06 |
| 12 | 59114606 | 59121938 | 7332   | 0.23 |
| 12 | 59526601 | 59554360 | 27759  | 0.17 |
| 12 | 60498484 | 60506092 | 7608   | 0.06 |
| 12 | 60796566 | 60808400 | 11834  | 0.06 |
| 12 | 61015330 | 61017772 | 2442   | 0.06 |
| 12 | 61867629 | 61872072 | 4443   | 0.06 |
| 12 | 63147944 | 63151375 | 3431   | 0.06 |
| 12 | 64271515 | 64384638 | 113123 | 0.29 |
| 12 | 65269412 | 65277255 | 7843   | 0.06 |
| 12 | 66722054 | 66725924 | 3870   | 0.06 |
| 12 | 68417768 | 68424871 | 7103   | 0.06 |
| 12 | 70858350 | 70863557 | 5207   | 0.06 |

SUPPLEMENTARY INFORMATION

|    |           |           |        |      |
|----|-----------|-----------|--------|------|
| 12 | 72359410  | 72369780  | 10370  | 0.06 |
| 12 | 72431108  | 72444161  | 13053  | 0.06 |
| 12 | 73401240  | 73424800  | 23560  | 0.17 |
| 12 | 73597862  | 73601707  | 3845   | 0.06 |
| 12 | 73688563  | 73715158  | 26595  | 0.17 |
| 12 | 76100309  | 76136590  | 36281  | 1.43 |
| 12 | 76706241  | 76713558  | 7317   | 0.06 |
| 12 | 77660330  | 77674320  | 13990  | 0.11 |
| 12 | 79460078  | 79482137  | 22059  | 0.11 |
| 12 | 79794032  | 79813732  | 19700  | 0.06 |
| 12 | 84014095  | 84033677  | 19582  | 0.06 |
| 12 | 84312697  | 84327813  | 15116  | 0.11 |
| 12 | 84951695  | 84961159  | 9464   | 0.11 |
| 12 | 86771724  | 86879880  | 108156 | 0.06 |
| 12 | 87018320  | 87031385  | 13065  | 0.11 |
| 12 | 88311426  | 88332765  | 21339  | 0.06 |
| 12 | 90552916  | 90763783  | 210867 | 0.11 |
| 12 | 92308478  | 92313029  | 4551   | 0.06 |
| 12 | 93255121  | 93271141  | 16020  | 0.23 |
| 12 | 93315763  | 93317252  | 1489   | 0.23 |
| 12 | 93484592  | 93503072  | 18480  | 0.29 |
| 12 | 93803903  | 93811430  | 7527   | 0.46 |
| 12 | 94478816  | 94488668  | 9852   | 0.06 |
| 12 | 95135622  | 95171113  | 35491  | 0.86 |
| 12 | 95362692  | 95389711  | 27019  | 0.11 |
| 12 | 96039562  | 96041461  | 1899   | 0.06 |
| 12 | 96440374  | 96457824  | 17450  | 0.06 |
| 12 | 97361236  | 97375350  | 14114  | 0.06 |
| 12 | 98193661  | 98209114  | 15453  | 0.23 |
| 12 | 101410671 | 101472396 | 61725  | 0.52 |
| 12 | 102628334 | 102631121 | 2787   | 0.06 |
| 12 | 102866082 | 102869482 | 3400   | 0.06 |
| 12 | 103802227 | 103808913 | 6686   | 0.06 |
| 12 | 107568194 | 107574299 | 6105   | 0.11 |
| 12 | 108173419 | 108175692 | 2273   | 0.11 |
| 12 | 110604531 | 110610242 | 5711   | 0.57 |
| 12 | 110906526 | 110915044 | 8518   | 0.06 |
| 12 | 111806340 | 111812396 | 6056   | 0.06 |
| 12 | 113359066 | 113371457 | 12391  | 0.06 |
| 12 | 114044311 | 114050990 | 6679   | 0.06 |
| 12 | 114635794 | 114644389 | 8595   | 0.06 |
| 12 | 117922745 | 117931579 | 8834   | 0.06 |
| 12 | 118118818 | 118132502 | 13684  | 0.06 |
| 12 | 119552240 | 119553972 | 1732   | 0.06 |
| 12 | 121180338 | 121187288 | 6950   | 0.06 |
| 12 | 121787389 | 121805999 | 18610  | 0.06 |

SUPPLEMENTARY INFORMATION

|    |           |           |        |      |
|----|-----------|-----------|--------|------|
| 12 | 122007327 | 122019673 | 12346  | 0.06 |
| 12 | 122105918 | 122123662 | 17744  | 0.06 |
| 12 | 122557457 | 122600613 | 43156  | 0.11 |
| 12 | 122844892 | 122870494 | 25602  | 0.52 |
| 12 | 123088247 | 123091734 | 3487   | 0.06 |
| 12 | 124256444 | 124264337 | 7893   | 0.06 |
| 12 | 124291951 | 124297598 | 5647   | 0.06 |
| 12 | 126338247 | 126343654 | 5407   | 0.11 |
| 12 | 126921858 | 126924576 | 2718   | 0.06 |
| 12 | 127005346 | 127010817 | 5471   | 0.06 |
| 12 | 127107838 | 127118110 | 10272  | 0.40 |
| 12 | 127796998 | 127805097 | 8099   | 0.06 |
| 12 | 128072414 | 128093983 | 21569  | 1.09 |
| 12 | 129043684 | 129055401 | 11717  | 0.17 |
| 12 | 129272084 | 129274511 | 2427   | 0.06 |
| 12 | 129811102 | 129813274 | 2172   | 0.23 |
| 12 | 129821758 | 129840428 | 18670  | 0.86 |
| 12 | 130007765 | 130010595 | 2830   | 0.11 |
| 12 | 130453014 | 130460912 | 7898   | 0.06 |
| 12 | 130733140 | 130735876 | 2736   | 0.11 |
| 12 | 131245772 | 131340814 | 95042  | 1.09 |
| 12 | 131370928 | 131380721 | 9793   | 0.06 |
| 12 | 131484705 | 131486583 | 1878   | 0.11 |
| 12 | 131540628 | 131543469 | 2841   | 0.06 |
| 12 | 131577718 | 131631122 | 53404  | 0.06 |
| 12 | 132393473 | 132410877 | 17404  | 0.11 |
| 12 | 132430921 | 132434067 | 3146   | 0.11 |
| 12 | 132632393 | 132649610 | 17217  | 0.06 |
| 13 | 20228784  | 20460311  | 231527 | 0.23 |
| 13 | 20914428  | 20923730  | 9302   | 0.06 |
| 13 | 22255776  | 22261708  | 5932   | 0.06 |
| 13 | 22329412  | 22339188  | 9776   | 0.06 |
| 13 | 23039738  | 23064163  | 24425  | 0.46 |
| 13 | 23413970  | 23422058  | 8088   | 0.06 |
| 13 | 24738385  | 24741868  | 3483   | 0.06 |
| 13 | 24995860  | 25005198  | 9338   | 0.86 |
| 13 | 26471742  | 26475476  | 3734   | 0.06 |
| 13 | 26912056  | 26915221  | 3165   | 0.06 |
| 13 | 26948828  | 26964359  | 15531  | 0.06 |
| 13 | 27061300  | 27066217  | 4917   | 0.06 |
| 13 | 27992958  | 28009029  | 16071  | 0.34 |
| 13 | 28218588  | 28263159  | 44571  | 0.06 |
| 13 | 30075614  | 30082996  | 7382   | 0.11 |
| 13 | 30227128  | 30232241  | 5113   | 0.06 |
| 13 | 30947166  | 30952348  | 5182   | 0.06 |
| 13 | 31638987  | 31645249  | 6262   | 0.06 |

SUPPLEMENTARY INFORMATION

|    |          |          |        |      |
|----|----------|----------|--------|------|
| 13 | 32097968 | 32099700 | 1732   | 1.03 |
| 13 | 32116838 | 32118173 | 1335   | 0.06 |
| 13 | 32757748 | 32777770 | 20022  | 0.17 |
| 13 | 36919839 | 36937654 | 17815  | 0.06 |
| 13 | 37496412 | 37546138 | 49726  | 0.97 |
| 13 | 37751408 | 37763530 | 12122  | 0.06 |
| 13 | 37853082 | 37855647 | 2565   | 0.17 |
| 13 | 38918942 | 38923532 | 4590   | 0.06 |
| 13 | 39545273 | 39550746 | 5473   | 0.57 |
| 13 | 39858567 | 39864762 | 6195   | 0.17 |
| 13 | 39887317 | 39890802 | 3485   | 0.06 |
| 13 | 40527751 | 40540636 | 12885  | 0.06 |
| 13 | 42068410 | 42072179 | 3769   | 0.06 |
| 13 | 42726161 | 42728389 | 2228   | 0.06 |
| 13 | 47173385 | 47187182 | 13797  | 0.06 |
| 13 | 48356448 | 48368678 | 12230  | 0.11 |
| 13 | 48918949 | 48930674 | 11725  | 0.06 |
| 13 | 49376947 | 49407144 | 30197  | 0.34 |
| 13 | 50598827 | 50606287 | 7460   | 0.11 |
| 13 | 51534431 | 51536485 | 2054   | 0.06 |
| 13 | 52578892 | 52599452 | 20560  | 0.29 |
| 13 | 54213723 | 54247776 | 34053  | 0.23 |
| 13 | 54502823 | 54513664 | 10841  | 0.06 |
| 13 | 55761580 | 55821875 | 60295  | 0.11 |
| 13 | 56413072 | 56428550 | 15478  | 0.06 |
| 13 | 57239433 | 57387355 | 147922 | 2.06 |
| 13 | 60533179 | 60567284 | 34105  | 0.06 |
| 13 | 60636327 | 60650236 | 13909  | 0.86 |
| 13 | 62017732 | 62026243 | 8511   | 0.29 |
| 13 | 62374856 | 62378736 | 3880   | 0.06 |
| 13 | 76036154 | 76039093 | 2939   | 1.32 |
| 13 | 76690994 | 76697218 | 6224   | 0.06 |
| 13 | 77360500 | 77362644 | 2144   | 0.06 |
| 13 | 78519634 | 78549041 | 29407  | 0.06 |
| 13 | 81674842 | 81709378 | 34536  | 0.06 |
| 13 | 81842320 | 81857711 | 15391  | 0.11 |
| 13 | 81925430 | 81938183 | 12753  | 0.06 |
| 13 | 82409359 | 82427027 | 17668  | 0.06 |
| 13 | 83527345 | 83582139 | 54794  | 1.66 |
| 13 | 83615544 | 83619236 | 3692   | 0.06 |
| 13 | 84034948 | 84050777 | 15829  | 0.06 |
| 13 | 84790917 | 84795232 | 4315   | 0.06 |
| 13 | 85285616 | 85308725 | 23109  | 1.38 |
| 13 | 85336739 | 85338172 | 1433   | 0.06 |
| 13 | 86684237 | 86934184 | 249947 | 7.28 |
| 13 | 86314889 | 86338351 | 23462  | 0.17 |

SUPPLEMENTARY INFORMATION

|    |           |           |        |      |
|----|-----------|-----------|--------|------|
| 13 | 86946854  | 86953207  | 6353   | 0.06 |
| 13 | 87294220  | 87301793  | 7573   | 0.06 |
| 13 | 89759222  | 89767502  | 8280   | 0.11 |
| 13 | 91302190  | 91304927  | 2737   | 0.06 |
| 13 | 91842792  | 91846936  | 4144   | 0.06 |
| 13 | 93272492  | 93305563  | 33071  | 0.11 |
| 13 | 93672343  | 93678615  | 6272   | 0.06 |
| 13 | 95351476  | 95372983  | 21507  | 0.75 |
| 13 | 96268166  | 96274136  | 5970   | 1.03 |
| 13 | 96305871  | 96309138  | 3267   | 0.17 |
| 13 | 98262439  | 98275214  | 12775  | 0.06 |
| 13 | 98678914  | 98681429  | 2515   | 0.06 |
| 13 | 99578605  | 99580570  | 1965   | 0.11 |
| 13 | 99633681  | 99647305  | 13624  | 0.17 |
| 13 | 99829113  | 99832682  | 3569   | 0.11 |
| 13 | 101528387 | 101671867 | 143480 | 0.17 |
| 13 | 103972302 | 103978606 | 6304   | 0.06 |
| 13 | 104021503 | 104030691 | 9188   | 0.17 |
| 13 | 104144594 | 104161520 | 16926  | 0.06 |
| 13 | 104740970 | 104752416 | 11446  | 0.23 |
| 13 | 105580652 | 105653286 | 72634  | 0.29 |
| 13 | 107516183 | 107532961 | 16778  | 0.06 |
| 13 | 110089431 | 110110313 | 20882  | 0.06 |
| 13 | 111435289 | 111438181 | 2892   | 0.06 |
| 13 | 111937985 | 111944644 | 6659   | 0.29 |
| 13 | 111979418 | 111986621 | 7203   | 0.11 |
| 13 | 112181730 | 112184670 | 2940   | 0.06 |
| 13 | 112201459 | 112203478 | 2019   | 0.06 |
| 13 | 112880068 | 112893719 | 13651  | 0.06 |
| 13 | 112979265 | 113013506 | 34241  | 0.23 |
| 13 | 113396307 | 113399947 | 3640   | 0.23 |
| 14 | 20215935  | 20275110  | 59175  | 1.15 |
| 14 | 20836761  | 20875328  | 38567  | 0.06 |
| 14 | 20877548  | 20952929  | 75381  | 4.64 |
| 14 | 20972304  | 20978068  | 5764   | 0.11 |
| 14 | 21601552  | 21633789  | 32237  | 0.06 |
| 14 | 22612317  | 22614001  | 1684   | 0.11 |
| 14 | 22708063  | 22720040  | 11977  | 0.06 |
| 14 | 22789297  | 22791483  | 2186   | 0.06 |
| 14 | 22796599  | 22802985  | 6386   | 0.06 |
| 14 | 23384946  | 23413975  | 29029  | 0.06 |
| 14 | 23817031  | 23819293  | 2262   | 0.11 |
| 14 | 23978239  | 23988910  | 10671  | 0.11 |
| 14 | 24757227  | 24761450  | 4223   | 0.06 |
| 14 | 25793937  | 25796620  | 2683   | 0.06 |
| 14 | 26186477  | 26222799  | 36322  | 0.11 |

SUPPLEMENTARY INFORMATION

|    |          |          |        |      |
|----|----------|----------|--------|------|
| 14 | 26723031 | 26728626 | 5595   | 0.06 |
| 14 | 27101354 | 27473006 | 371652 | 0.06 |
| 14 | 27936620 | 27965310 | 28690  | 0.06 |
| 14 | 27991880 | 28050598 | 58718  | 0.11 |
| 14 | 28105513 | 28483881 | 378368 | 1.20 |
| 14 | 30657532 | 30678129 | 20597  | 0.06 |
| 14 | 30804471 | 30811759 | 7288   | 0.06 |
| 14 | 31253232 | 31261966 | 8734   | 0.06 |
| 14 | 32706616 | 32712150 | 5534   | 0.17 |
| 14 | 32857325 | 32928169 | 70844  | 0.11 |
| 14 | 32969302 | 32973053 | 3751   | 0.11 |
| 14 | 33397214 | 33404032 | 6818   | 0.06 |
| 14 | 34547992 | 34626739 | 78747  | 0.52 |
| 14 | 36204669 | 36209380 | 4711   | 0.06 |
| 14 | 36658048 | 36664141 | 6093   | 0.06 |
| 14 | 37126427 | 37132737 | 6310   | 0.17 |
| 14 | 39843096 | 39848889 | 5793   | 0.06 |
| 14 | 39955901 | 40050209 | 94308  | 0.17 |
| 14 | 40148816 | 40173342 | 24526  | 0.06 |
| 14 | 41130816 | 41138799 | 7983   | 0.06 |
| 14 | 41274991 | 41501068 | 226077 | 0.29 |
| 14 | 41922415 | 41939740 | 17325  | 0.06 |
| 14 | 42363186 | 42370418 | 7232   | 0.06 |
| 14 | 42594675 | 42610488 | 15813  | 0.11 |
| 14 | 43019672 | 43034338 | 14666  | 0.06 |
| 14 | 43227128 | 43241157 | 14029  | 0.06 |
| 14 | 43376762 | 43412447 | 35685  | 0.06 |
| 14 | 43490010 | 43511500 | 21490  | 0.06 |
| 14 | 43561379 | 43619224 | 57845  | 0.06 |
| 14 | 44034845 | 44062214 | 27369  | 0.52 |
| 14 | 44307009 | 44328991 | 21982  | 0.06 |
| 14 | 44677278 | 44682347 | 5069   | 0.46 |
| 14 | 44712092 | 44754254 | 42162  | 0.29 |
| 14 | 47760853 | 47808269 | 47416  | 0.34 |
| 14 | 48320260 | 48443440 | 123180 | 0.06 |
| 14 | 48613609 | 48665931 | 52322  | 0.11 |
| 14 | 48722837 | 48784014 | 61177  | 0.06 |
| 14 | 48911691 | 48915645 | 3954   | 0.69 |
| 14 | 48926670 | 48944788 | 18118  | 0.23 |
| 14 | 52635966 | 52687018 | 51052  | 0.29 |
| 14 | 52771121 | 52777919 | 6798   | 0.06 |
| 14 | 53272117 | 53296289 | 24172  | 0.17 |
| 14 | 56379958 | 56433324 | 53366  | 0.11 |
| 14 | 56920314 | 56937236 | 16922  | 0.06 |
| 14 | 57666832 | 57675265 | 8433   | 0.69 |
| 14 | 59002955 | 59009283 | 6328   | 0.06 |

SUPPLEMENTARY INFORMATION

|    |          |          |        |      |
|----|----------|----------|--------|------|
| 14 | 59198568 | 59201930 | 3362   | 0.06 |
| 14 | 59959510 | 60032791 | 73281  | 0.06 |
| 14 | 61497351 | 61516910 | 19559  | 0.17 |
| 14 | 61931149 | 61942464 | 11315  | 0.06 |
| 14 | 62331767 | 62334509 | 2742   | 0.23 |
| 14 | 62490173 | 62492818 | 2645   | 0.11 |
| 14 | 63111303 | 63116391 | 5088   | 0.06 |
| 14 | 63432267 | 63447059 | 14792  | 0.06 |
| 14 | 63489794 | 63496191 | 6397   | 0.29 |
| 14 | 63763371 | 63841725 | 78354  | 0.17 |
| 14 | 64009152 | 64032207 | 23055  | 0.34 |
| 14 | 65157091 | 65166076 | 8985   | 0.06 |
| 14 | 65174526 | 65176629 | 2103   | 0.06 |
| 14 | 65188381 | 65192018 | 3637   | 0.06 |
| 14 | 65862173 | 65868884 | 6711   | 0.06 |
| 14 | 69886900 | 69889517 | 2617   | 0.06 |
| 14 | 72402082 | 72409454 | 7372   | 0.06 |
| 14 | 73559982 | 73584938 | 24956  | 0.29 |
| 14 | 73769024 | 73778904 | 9880   | 0.11 |
| 14 | 73993924 | 74001940 | 8016   | 0.29 |
| 14 | 74027734 | 74074781 | 47047  | 0.06 |
| 14 | 74640832 | 74649233 | 8401   | 0.23 |
| 14 | 77145768 | 77147515 | 1747   | 0.06 |
| 14 | 77475120 | 77492472 | 17352  | 0.23 |
| 14 | 78068563 | 78079500 | 10937  | 0.06 |
| 14 | 78993068 | 79017240 | 24172  | 0.06 |
| 14 | 79539319 | 79547291 | 7972   | 0.06 |
| 14 | 82265862 | 82275144 | 9282   | 0.06 |
| 14 | 83060926 | 83437932 | 377006 | 0.06 |
| 14 | 83702151 | 83706040 | 3889   | 0.06 |
| 14 | 84615147 | 84628426 | 13279  | 0.06 |
| 14 | 85404493 | 85407192 | 2699   | 0.06 |
| 14 | 85994571 | 86022737 | 28166  | 0.80 |
| 14 | 89309840 | 89315495 | 5655   | 0.06 |
| 14 | 89462240 | 89470286 | 8046   | 0.06 |
| 14 | 90058540 | 90071571 | 13031  | 0.06 |
| 14 | 90148442 | 90151050 | 2608   | 0.11 |
| 14 | 92115481 | 92117685 | 2204   | 0.06 |
| 14 | 94041896 | 94045763 | 3867   | 0.17 |
| 14 | 94945834 | 94953775 | 7941   | 2.12 |
| 14 | 96061192 | 96068116 | 6924   | 0.11 |
| 14 | 96129215 | 96131580 | 2365   | 0.11 |
| 14 | 96889208 | 96897139 | 7931   | 0.06 |
| 14 | 97175041 | 97180740 | 5699   | 0.06 |
| 14 | 97727875 | 97743393 | 15518  | 0.11 |
| 14 | 98568439 | 98590755 | 22316  | 0.40 |

SUPPLEMENTARY INFORMATION

|    |           |           |        |      |
|----|-----------|-----------|--------|------|
| 14 | 99107349  | 99112788  | 5439   | 0.06 |
| 14 | 100724670 | 100740386 | 15716  | 0.06 |
| 14 | 102551958 | 102568207 | 16249  | 0.06 |
| 14 | 104570952 | 104589639 | 18687  | 0.23 |
| 14 | 104769950 | 104804187 | 34237  | 0.06 |
| 14 | 104852515 | 104898819 | 46304  | 0.29 |
| 14 | 105383761 | 105397519 | 13758  | 0.69 |
| 15 | 24112065  | 24518827  | 406762 | 2.52 |
| 15 | 24821213  | 24839447  | 18234  | 0.29 |
| 15 | 24845258  | 24871394  | 26136  | 0.11 |
| 15 | 24923986  | 24927476  | 3490   | 0.11 |
| 15 | 26505921  | 26518060  | 12139  | 0.06 |
| 15 | 31745235  | 31752985  | 7750   | 0.06 |
| 15 | 32216889  | 32327926  | 111037 | 2.24 |
| 15 | 33226279  | 33227964  | 1685   | 0.06 |
| 15 | 35057529  | 35059024  | 1495   | 0.06 |
| 15 | 36155410  | 36162641  | 7231   | 0.06 |
| 15 | 37924977  | 37928190  | 3213   | 0.06 |
| 15 | 38953515  | 38971288  | 17773  | 0.17 |
| 15 | 40636415  | 40667426  | 31011  | 0.11 |
| 15 | 40706144  | 40716144  | 10000  | 0.06 |
| 15 | 41160937  | 41200815  | 39878  | 0.17 |
| 15 | 41924350  | 41930192  | 5842   | 0.06 |
| 15 | 42070825  | 42083765  | 12940  | 0.11 |
| 15 | 42098025  | 42099966  | 1941   | 0.17 |
| 15 | 42112316  | 42115568  | 3252   | 0.86 |
| 15 | 42525828  | 42588152  | 62324  | 0.17 |
| 15 | 43023851  | 43032351  | 8500   | 0.06 |
| 15 | 44946097  | 44989584  | 43487  | 0.52 |
| 15 | 45109926  | 45117706  | 7780   | 0.17 |
| 15 | 46151495  | 46161683  | 10188  | 0.11 |
| 15 | 49520918  | 49523178  | 2260   | 0.06 |
| 15 | 50256899  | 50272687  | 15788  | 0.06 |
| 15 | 50591947  | 50748601  | 156654 | 0.52 |
| 15 | 51195155  | 51199657  | 4502   | 0.06 |
| 15 | 51966500  | 52004439  | 37939  | 0.46 |
| 15 | 52090724  | 52095803  | 5079   | 0.06 |
| 15 | 52716726  | 52718586  | 1860   | 0.06 |
| 15 | 52782295  | 52790685  | 8390   | 0.06 |
| 15 | 55415501  | 55438983  | 23482  | 0.06 |
| 15 | 55801540  | 55810338  | 8798   | 0.06 |
| 15 | 57710991  | 57713313  | 2322   | 0.06 |
| 15 | 58199610  | 58222367  | 22757  | 0.06 |
| 15 | 58429614  | 58439256  | 9642   | 0.06 |
| 15 | 58508567  | 58574881  | 66314  | 0.06 |
| 15 | 59308916  | 59312337  | 3421   | 0.06 |



SUPPLEMENTARY INFORMATION

|    |          |          |        |      |
|----|----------|----------|--------|------|
| 15 | 59759843 | 59803362 | 43519  | 0.69 |
| 15 | 66735166 | 66742613 | 7447   | 0.06 |
| 15 | 66764233 | 66766921 | 2688   | 0.06 |
| 15 | 67984005 | 68004550 | 20545  | 0.06 |
| 15 | 68459549 | 68464362 | 4813   | 0.17 |
| 15 | 68743881 | 68768599 | 24718  | 0.17 |
| 15 | 69371049 | 69375434 | 4385   | 0.06 |
| 15 | 70194233 | 70197005 | 2772   | 0.06 |
| 15 | 72414443 | 72432875 | 18432  | 0.06 |
| 15 | 73085681 | 73138420 | 52739  | 0.06 |
| 15 | 74253301 | 74259262 | 5961   | 0.29 |
| 15 | 74295847 | 74318059 | 22212  | 0.23 |
| 15 | 74335666 | 74338282 | 2616   | 0.06 |
| 15 | 75489213 | 75522363 | 33150  | 0.23 |
| 15 | 75670873 | 75701407 | 30534  | 0.11 |
| 15 | 76201024 | 76213679 | 12655  | 0.06 |
| 15 | 76646259 | 76679115 | 32856  | 0.06 |
| 15 | 76995740 | 77034495 | 38755  | 0.34 |
| 15 | 77256301 | 77281885 | 25584  | 0.06 |
| 15 | 77544008 | 77592162 | 48154  | 0.46 |
| 15 | 77606077 | 77620087 | 14010  | 0.06 |
| 15 | 77780520 | 77799190 | 18670  | 0.69 |
| 15 | 79256109 | 79261492 | 5383   | 0.86 |
| 15 | 80434281 | 80436028 | 1747   | 0.06 |
| 15 | 82104669 | 82109185 | 4516   | 0.80 |
| 15 | 82634768 | 82642084 | 7316   | 0.06 |
| 15 | 84917702 | 84958185 | 40483  | 0.17 |
| 15 | 85786279 | 85789950 | 3671   | 0.06 |
| 15 | 85814285 | 85820469 | 6184   | 0.46 |
| 15 | 85839982 | 85843332 | 3350   | 0.06 |
| 15 | 86428401 | 86473279 | 44878  | 0.23 |
| 15 | 86951933 | 86960021 | 8088   | 0.06 |
| 15 | 87188292 | 87194642 | 6350   | 0.17 |
| 15 | 87362985 | 87366884 | 3899   | 0.75 |
| 15 | 87603315 | 87627650 | 24335  | 0.06 |
| 15 | 89066719 | 89070819 | 4100   | 0.17 |
| 15 | 89631201 | 89645161 | 13960  | 0.06 |
| 15 | 89655941 | 89664988 | 9047   | 0.06 |
| 15 | 89675931 | 89731525 | 55594  | 0.06 |
| 15 | 89822228 | 89830207 | 7979   | 0.06 |
| 15 | 89924262 | 89971157 | 46895  | 0.06 |
| 15 | 90308068 | 90310105 | 2037   | 0.06 |
| 15 | 92429951 | 92651958 | 222007 | 0.23 |
| 15 | 93253947 | 93255540 | 1593   | 0.06 |
| 15 | 93313961 | 93323262 | 9301   | 0.34 |
| 15 | 93572837 | 93580568 | 7731   | 0.11 |

SUPPLEMENTARY INFORMATION

|    |           |           |       |      |
|----|-----------|-----------|-------|------|
| 15 | 95447283  | 95451555  | 4272  | 0.06 |
| 15 | 96719197  | 96725488  | 6291  | 0.11 |
| 15 | 98132833  | 98136845  | 4012  | 0.11 |
| 15 | 98236794  | 98240955  | 4161  | 0.34 |
| 15 | 99065787  | 99084185  | 18398 | 0.11 |
| 15 | 99097113  | 99099267  | 2154  | 0.34 |
| 15 | 100656059 | 100661399 | 5340  | 0.34 |
| 15 | 101409722 | 101419713 | 9991  | 0.06 |
| 16 | 1729088   | 1778838   | 49750 | 0.34 |
| 16 | 1833278   | 1919876   | 86598 | 0.92 |
| 16 | 1964282   | 1985921   | 21639 | 0.06 |
| 16 | 1997862   | 2004154   | 6292  | 0.17 |
| 16 | 2058754   | 2109241   | 50487 | 0.63 |
| 16 | 2272715   | 2299205   | 26490 | 0.06 |
| 16 | 2357438   | 2404509   | 47071 | 0.29 |
| 16 | 2915518   | 2978416   | 62898 | 0.06 |
| 16 | 3524622   | 3528630   | 4008  | 0.06 |
| 16 | 3553179   | 3576300   | 23121 | 0.80 |
| 16 | 3674351   | 3676093   | 1742  | 0.06 |
| 16 | 4058741   | 4093180   | 34439 | 0.23 |
| 16 | 4173961   | 4179383   | 5422  | 0.06 |
| 16 | 4891046   | 4902458   | 11412 | 0.40 |
| 16 | 4979496   | 4996207   | 16711 | 0.06 |
| 16 | 6042692   | 6051067   | 8375  | 0.06 |
| 16 | 6097580   | 6099243   | 1663  | 0.06 |
| 16 | 6556677   | 6639465   | 82788 | 0.11 |
| 16 | 6749201   | 6751845   | 2644  | 0.06 |
| 16 | 6793114   | 6803745   | 10631 | 0.11 |
| 16 | 6885886   | 6982360   | 96474 | 0.23 |
| 16 | 6989597   | 7078136   | 88539 | 0.11 |
| 16 | 8071351   | 8074842   | 3491  | 0.75 |
| 16 | 8418992   | 8425901   | 6909  | 0.06 |
| 16 | 9024742   | 9045221   | 20479 | 0.23 |
| 16 | 9165375   | 9170501   | 5126  | 0.06 |
| 16 | 10555182  | 10558906  | 3724  | 0.06 |
| 16 | 10634387  | 10635681  | 1294  | 0.34 |
| 16 | 10699285  | 10711898  | 12613 | 0.46 |
| 16 | 11154606  | 11160470  | 5864  | 0.06 |
| 16 | 11192572  | 11197270  | 4698  | 0.06 |
| 16 | 11604850  | 11622878  | 18028 | 0.06 |
| 16 | 12558104  | 12560975  | 2871  | 0.17 |
| 16 | 12627664  | 12631355  | 3691  | 0.06 |
| 16 | 13061016  | 13062909  | 1893  | 0.06 |
| 16 | 13274082  | 13284432  | 10350 | 0.06 |
| 16 | 13568822  | 13578087  | 9265  | 0.11 |
| 16 | 14558982  | 14567379  | 8397  | 0.06 |

SUPPLEMENTARY INFORMATION

|    |          |          |        |      |
|----|----------|----------|--------|------|
| 16 | 19974855 | 19979291 | 4436   | 0.06 |
| 16 | 22379935 | 22428998 | 49063  | 0.06 |
| 16 | 22616132 | 22692420 | 76288  | 0.23 |
| 16 | 24404303 | 24406215 | 1912   | 0.06 |
| 16 | 24437735 | 24452238 | 14503  | 0.06 |
| 16 | 25186259 | 25190659 | 4400   | 0.06 |
| 16 | 25619297 | 25627932 | 8635   | 0.11 |
| 16 | 25745922 | 25759427 | 13505  | 0.17 |
| 16 | 27325106 | 27339366 | 14260  | 0.17 |
| 16 | 28591670 | 28618832 | 27162  | 1.38 |
| 16 | 30377388 | 30385962 | 8574   | 0.06 |
| 16 | 31408522 | 31424558 | 16036  | 0.06 |
| 16 | 31701124 | 31708731 | 7607   | 0.11 |
| 16 | 32457714 | 32638415 | 180701 | 5.10 |
| 16 | 34025437 | 34117342 | 91905  | 3.04 |
| 16 | 34121562 | 34130550 | 8988   | 0.06 |
| 16 | 47882325 | 47894006 | 11681  | 0.57 |
| 16 | 48424421 | 48427842 | 3421   | 0.06 |
| 16 | 49703131 | 49706034 | 2903   | 0.11 |
| 16 | 49922283 | 49926346 | 4063   | 0.06 |
| 16 | 52339798 | 52344524 | 4726   | 0.11 |
| 16 | 55193022 | 55197284 | 4262   | 0.06 |
| 16 | 58336933 | 58349751 | 12818  | 0.11 |
| 16 | 58638361 | 58649955 | 11594  | 0.06 |
| 16 | 58983958 | 58991483 | 7525   | 0.40 |
| 16 | 59213779 | 59220586 | 6807   | 0.06 |
| 16 | 60048702 | 60064640 | 15938  | 0.80 |
| 16 | 60261060 | 60429506 | 168446 | 0.06 |
| 16 | 64041792 | 64080394 | 38602  | 0.97 |
| 16 | 64230338 | 64319776 | 89438  | 0.06 |
| 16 | 64879394 | 64892279 | 12885  | 0.06 |
| 16 | 66262541 | 66265815 | 3274   | 0.06 |
| 16 | 67184339 | 67203991 | 19652  | 0.06 |
| 16 | 68711938 | 68743930 | 31992  | 0.06 |
| 16 | 69109129 | 69115407 | 6278   | 0.06 |
| 16 | 69618542 | 69671023 | 52481  | 0.23 |
| 16 | 69690320 | 69706471 | 16151  | 0.23 |
| 16 | 69818655 | 69821723 | 3068   | 0.06 |
| 16 | 71949758 | 71981464 | 31706  | 0.06 |
| 16 | 73586806 | 73590919 | 4113   | 0.06 |
| 16 | 75497871 | 75544561 | 46690  | 0.29 |
| 16 | 75959815 | 76022476 | 62661  | 0.11 |
| 16 | 76392323 | 76393644 | 1321   | 0.06 |
| 16 | 76630598 | 76637010 | 6412   | 2.41 |
| 16 | 77099041 | 77101870 | 2829   | 0.06 |
| 16 | 77190683 | 77195253 | 4570   | 0.06 |

SUPPLEMENTARY INFORMATION

|    |          |          |        |      |
|----|----------|----------|--------|------|
| 16 | 77713212 | 77720677 | 7465   | 0.06 |
| 16 | 78008733 | 78044242 | 35509  | 0.06 |
| 16 | 78117440 | 78138201 | 20761  | 0.17 |
| 16 | 78297437 | 78301601 | 4164   | 0.06 |
| 16 | 78351415 | 78369728 | 18313  | 0.06 |
| 16 | 78467048 | 78475182 | 8134   | 0.06 |
| 16 | 78910158 | 78914180 | 4022   | 0.40 |
| 16 | 79226868 | 79239785 | 12917  | 0.40 |
| 16 | 80092692 | 80102545 | 9853   | 0.06 |
| 16 | 81472988 | 81476122 | 3134   | 0.06 |
| 16 | 82804425 | 82816102 | 11677  | 0.06 |
| 16 | 82930026 | 82939716 | 9690   | 0.06 |
| 16 | 83162838 | 83175549 | 12711  | 0.34 |
| 16 | 83857418 | 83862148 | 4730   | 0.29 |
| 16 | 84014893 | 84018865 | 3972   | 0.06 |
| 16 | 84351810 | 84357821 | 6011   | 0.06 |
| 16 | 84389150 | 84399428 | 10278  | 0.11 |
| 16 | 84891388 | 84896955 | 5567   | 0.06 |
| 16 | 85011068 | 85024688 | 13620  | 0.11 |
| 16 | 85086894 | 85091106 | 4212   | 0.06 |
| 16 | 85868890 | 85872665 | 3775   | 0.11 |
| 16 | 85981541 | 85984109 | 2568   | 0.06 |
| 16 | 86077333 | 86086079 | 8746   | 0.06 |
| 16 | 86126873 | 86129615 | 2742   | 0.06 |
| 16 | 86734866 | 86739157 | 4291   | 0.06 |
| 16 | 87025260 | 87030270 | 5010   | 0.06 |
| 16 | 87799745 | 87812868 | 13123  | 0.11 |
| 16 | 88412559 | 88502518 | 89959  | 0.34 |
| 16 | 89085500 | 89258444 | 172944 | 0.52 |
| 16 | 89510358 | 89542941 | 32583  | 0.06 |
| 16 | 89582172 | 89590223 | 8051   | 0.23 |
| 16 | 89694244 | 89713682 | 19438  | 0.52 |
| 17 | 669230   | 676608   | 7378   | 0.06 |
| 17 | 863159   | 914836   | 51677  | 0.06 |
| 17 | 926526   | 946069   | 19543  | 0.06 |
| 17 | 1429808  | 1431357  | 1549   | 0.06 |
| 17 | 1444355  | 1449407  | 5052   | 0.06 |
| 17 | 1580292  | 1591366  | 11074  | 0.06 |
| 17 | 1727290  | 1754605  | 27315  | 0.23 |
| 17 | 1812141  | 1819019  | 6878   | 0.06 |
| 17 | 1824484  | 1837648  | 13164  | 0.06 |
| 17 | 2142081  | 2166389  | 24308  | 0.06 |
| 17 | 3451970  | 3462094  | 10124  | 0.06 |
| 17 | 3601380  | 3656529  | 55149  | 0.06 |
| 17 | 4377518  | 4398152  | 20634  | 0.06 |
| 17 | 4446804  | 4448703  | 1899   | 0.11 |

SUPPLEMENTARY INFORMATION

|    |          |          |         |      |
|----|----------|----------|---------|------|
| 17 | 4533059  | 4552832  | 19773   | 0.52 |
| 17 | 6968559  | 6973541  | 4982    | 0.11 |
| 17 | 9334559  | 9348828  | 14269   | 0.06 |
| 17 | 10858182 | 10862167 | 3985    | 0.40 |
| 17 | 12441028 | 12449819 | 8791    | 0.06 |
| 17 | 16106601 | 16113495 | 6894    | 0.06 |
| 17 | 17497658 | 17543170 | 45512   | 0.17 |
| 17 | 17783027 | 17812355 | 29328   | 0.11 |
| 17 | 18118725 | 18123829 | 5104    | 0.06 |
| 17 | 18229963 | 18252087 | 22124   | 0.06 |
| 17 | 18972458 | 19005730 | 33272   | 0.17 |
| 17 | 19590814 | 19634157 | 43343   | 3.96 |
| 17 | 19738008 | 19742798 | 4790    | 0.52 |
| 17 | 20935101 | 20940244 | 5143    | 0.06 |
| 17 | 28420462 | 28435672 | 15210   | 0.06 |
| 17 | 28835436 | 28843138 | 7702    | 0.06 |
| 17 | 29423532 | 29489668 | 66136   | 0.80 |
| 17 | 30107814 | 30183232 | 75418   | 0.29 |
| 17 | 30759639 | 30904681 | 145042  | 0.92 |
| 17 | 31182394 | 31234697 | 52303   | 0.11 |
| 17 | 31507754 | 31513400 | 5646    | 0.11 |
| 17 | 31704788 | 31715630 | 10842   | 0.17 |
| 17 | 33660771 | 33668288 | 7517    | 0.11 |
| 17 | 35354316 | 35441265 | 86949   | 0.23 |
| 17 | 36085689 | 36153338 | 67649   | 0.17 |
| 17 | 36461875 | 37890178 | 1428303 | 0.75 |
| 17 | 38927724 | 38996971 | 69247   | 0.52 |
| 17 | 39243242 | 39252489 | 9247    | 0.06 |
| 17 | 41122053 | 41132726 | 10673   | 0.29 |
| 17 | 41256142 | 41264680 | 8538    | 0.06 |
| 17 | 44258576 | 44262855 | 4279    | 0.23 |
| 17 | 44404704 | 44493354 | 88650   | 0.11 |
| 17 | 44757761 | 44781608 | 23847   | 0.23 |
| 17 | 45835216 | 45851500 | 16284   | 0.29 |
| 17 | 46944098 | 46989499 | 45401   | 0.06 |
| 17 | 47061561 | 47075159 | 13598   | 0.40 |
| 17 | 47138377 | 47168960 | 30583   | 0.23 |
| 17 | 47800841 | 47808390 | 7549    | 0.11 |
| 17 | 47963029 | 47973269 | 10240   | 0.06 |
| 17 | 49634976 | 49650737 | 15761   | 0.06 |
| 17 | 50232082 | 50240967 | 8885    | 0.11 |
| 17 | 52867186 | 52873738 | 6552    | 0.06 |
| 17 | 53849964 | 53861555 | 11591   | 0.06 |
| 17 | 54827112 | 54831095 | 3983    | 0.06 |
| 17 | 58664311 | 58672267 | 7956    | 0.17 |
| 17 | 59277357 | 59312932 | 35575   | 0.06 |

SUPPLEMENTARY INFORMATION

|    |          |          |        |      |
|----|----------|----------|--------|------|
| 17 | 60132228 | 60160277 | 28049  | 0.29 |
| 17 | 60444947 | 60516473 | 71526  | 0.29 |
| 17 | 60698206 | 60774498 | 76292  | 0.17 |
| 17 | 61970281 | 61994410 | 24129  | 0.06 |
| 17 | 62664556 | 62698051 | 33495  | 0.57 |
| 17 | 63045926 | 63085561 | 39635  | 0.06 |
| 17 | 63939683 | 63973168 | 33485  | 0.40 |
| 17 | 64638752 | 64652251 | 13499  | 0.06 |
| 17 | 69495791 | 69503576 | 7785   | 0.06 |
| 17 | 72792602 | 72798228 | 5626   | 0.40 |
| 17 | 72818994 | 72823658 | 4664   | 0.23 |
| 17 | 73750237 | 73752292 | 2055   | 1.38 |
| 17 | 74281740 | 74305569 | 23829  | 0.06 |
| 17 | 75077648 | 75082964 | 5316   | 0.11 |
| 17 | 75162278 | 75210556 | 48278  | 0.06 |
| 17 | 76132255 | 76138113 | 5858   | 0.11 |
| 17 | 76656192 | 76662002 | 5810   | 0.06 |
| 17 | 77270169 | 77274756 | 4587   | 0.34 |
| 17 | 77517625 | 77525013 | 7388   | 0.06 |
| 17 | 77635768 | 77663499 | 27731  | 0.06 |
| 17 | 78420744 | 78433469 | 12725  | 0.23 |
| 17 | 79083494 | 79096944 | 13450  | 0.40 |
| 17 | 80002336 | 80012331 | 9995   | 0.17 |
| 17 | 80824354 | 80832227 | 7873   | 0.06 |
| 17 | 81359903 | 81364197 | 4294   | 0.06 |
| 17 | 81409814 | 81462332 | 52518  | 0.46 |
| 17 | 81692041 | 81696850 | 4809   | 0.06 |
| 17 | 81711066 | 81720891 | 9825   | 0.17 |
| 17 | 82076922 | 82095290 | 18368  | 0.86 |
| 17 | 82291935 | 82333968 | 42033  | 0.06 |
| 18 | 508455   | 515876   | 7421   | 0.11 |
| 18 | 1198102  | 1204388  | 6286   | 0.06 |
| 18 | 1707172  | 1839338  | 132166 | 0.29 |
| 18 | 1905524  | 1982550  | 77026  | 0.34 |
| 18 | 2551773  | 2561264  | 9491   | 0.17 |
| 18 | 4155326  | 4163810  | 8484   | 0.17 |
| 18 | 4329893  | 4335067  | 5174   | 1.09 |
| 18 | 4467980  | 4478774  | 10794  | 0.06 |
| 18 | 5148002  | 5177967  | 29965  | 0.06 |
| 18 | 5926003  | 5934150  | 8147   | 1.26 |
| 18 | 6544261  | 6547132  | 2871   | 0.06 |
| 18 | 7304510  | 7307152  | 2642   | 0.06 |
| 18 | 7687293  | 7716252  | 28959  | 0.06 |
| 18 | 8453781  | 8455963  | 2182   | 0.06 |
| 18 | 8479545  | 8486158  | 6613   | 0.06 |
| 18 | 8734891  | 8736059  | 1168   | 0.23 |

SUPPLEMENTARY INFORMATION

|    |          |          |        |      |
|----|----------|----------|--------|------|
| 18 | 8842882  | 8845225  | 2343   | 0.06 |
| 18 | 10135337 | 10143880 | 8543   | 0.17 |
| 18 | 10286881 | 10289167 | 2286   | 0.11 |
| 18 | 10913665 | 10920284 | 6619   | 0.06 |
| 18 | 11559235 | 11566111 | 6876   | 0.29 |
| 18 | 11682429 | 11685670 | 3241   | 0.46 |
| 18 | 13481721 | 13488357 | 6636   | 0.06 |
| 18 | 13796352 | 13804920 | 8568   | 0.06 |
| 18 | 13809357 | 13815681 | 6324   | 0.29 |
| 18 | 14549800 | 14569900 | 20100  | 0.23 |
| 18 | 14767226 | 14781600 | 14374  | 0.17 |
| 18 | 22463469 | 22483610 | 20141  | 0.80 |
| 18 | 26285904 | 26318807 | 32903  | 0.06 |
| 18 | 26959306 | 27095784 | 136478 | 0.06 |
| 18 | 30701259 | 30703445 | 2186   | 0.29 |
| 18 | 32019229 | 32056105 | 36876  | 0.06 |
| 18 | 32917884 | 32923371 | 5487   | 0.23 |
| 18 | 34144420 | 34161840 | 17420  | 0.06 |
| 18 | 35770922 | 35777714 | 6792   | 0.17 |
| 18 | 35886532 | 35896604 | 10072  | 0.06 |
| 18 | 36675153 | 36677628 | 2475   | 0.06 |
| 18 | 37297998 | 37307236 | 9238   | 0.23 |
| 18 | 37951854 | 37956410 | 4556   | 0.17 |
| 18 | 38846732 | 38913547 | 66815  | 0.06 |
| 18 | 39361646 | 39382632 | 20986  | 0.23 |
| 18 | 39893876 | 40074303 | 180427 | 0.11 |
| 18 | 43300764 | 43328621 | 27857  | 0.97 |
| 18 | 44185713 | 44196001 | 10288  | 0.11 |
| 18 | 47709030 | 47715734 | 6704   | 0.06 |
| 18 | 48785857 | 48788344 | 2487   | 0.06 |
| 18 | 48835749 | 48843170 | 7421   | 0.06 |
| 18 | 51299558 | 51302974 | 3416   | 0.06 |
| 18 | 51690001 | 51696873 | 6872   | 0.17 |
| 18 | 52697828 | 52741180 | 43352  | 0.06 |
| 18 | 53751725 | 54019362 | 267637 | 0.06 |
| 18 | 55899240 | 55906136 | 6896   | 0.06 |
| 18 | 56796689 | 56817415 | 20726  | 0.06 |
| 18 | 57751213 | 57756011 | 4798   | 0.06 |
| 18 | 58262733 | 58269877 | 7144   | 0.29 |
| 18 | 59128155 | 59135318 | 7163   | 0.29 |
| 18 | 59648900 | 60373354 | 724454 | 0.75 |
| 18 | 61436808 | 61438126 | 1318   | 0.06 |
| 18 | 62044077 | 62047523 | 3446   | 0.06 |
| 18 | 63695508 | 63698973 | 3465   | 0.06 |
| 18 | 63781955 | 63786305 | 4350   | 0.06 |
| 18 | 64388614 | 64394378 | 5764   | 0.06 |

SUPPLEMENTARY INFORMATION

|    |          |          |        |      |
|----|----------|----------|--------|------|
| 18 | 65193942 | 65198125 | 4183   | 0.06 |
| 18 | 66165678 | 66202607 | 36929  | 0.46 |
| 18 | 66408511 | 66424228 | 15717  | 0.06 |
| 18 | 66633991 | 66649298 | 15307  | 0.06 |
| 18 | 67223103 | 67226988 | 3885   | 0.52 |
| 18 | 67629278 | 67651557 | 22279  | 3.78 |
| 18 | 67852277 | 67860216 | 7939   | 0.06 |
| 18 | 68928378 | 68955687 | 27309  | 0.06 |
| 18 | 69108747 | 69118448 | 9701   | 0.06 |
| 18 | 70609833 | 70617574 | 7741   | 0.06 |
| 18 | 70785891 | 70787771 | 1880   | 0.06 |
| 18 | 71681925 | 71685516 | 3591   | 0.46 |
| 18 | 71821634 | 71831310 | 9676   | 0.11 |
| 18 | 72108877 | 72114851 | 5974   | 0.06 |
| 18 | 72973403 | 72975319 | 1916   | 0.11 |
| 18 | 76753980 | 76758869 | 4889   | 0.06 |
| 18 | 77051138 | 77058717 | 7579   | 0.17 |
| 18 | 77531405 | 77539104 | 7699   | 0.06 |
| 18 | 77702180 | 77704253 | 2073   | 0.06 |
| 18 | 78409421 | 78410716 | 1295   | 0.23 |
| 18 | 78741662 | 78751454 | 9792   | 0.11 |
| 18 | 78924386 | 78927314 | 2928   | 0.06 |
| 18 | 79166524 | 79169090 | 2566   | 0.06 |
| 18 | 79574401 | 79591204 | 16803  | 0.63 |
| 19 | 624683   | 665186   | 40503  | 0.29 |
| 19 | 836557   | 841398   | 4841   | 0.06 |
| 19 | 1134574  | 1168989  | 34415  | 0.34 |
| 19 | 1456115  | 1508739  | 52624  | 0.11 |
| 19 | 1781709  | 1789961  | 8252   | 0.23 |
| 19 | 2110747  | 2136516  | 25769  | 0.17 |
| 19 | 2577529  | 2610951  | 33422  | 0.06 |
| 19 | 2895803  | 2926995  | 31192  | 0.06 |
| 19 | 3908041  | 3913476  | 5435   | 0.11 |
| 19 | 3930876  | 3951842  | 20966  | 0.11 |
| 19 | 4131135  | 4145774  | 14639  | 0.06 |
| 19 | 4358309  | 4368145  | 9836   | 0.06 |
| 19 | 5178268  | 5203845  | 25577  | 0.11 |
| 19 | 5455411  | 5456919  | 1508   | 0.23 |
| 19 | 5688177  | 5711919  | 23742  | 0.11 |
| 19 | 6957399  | 7074550  | 117151 | 0.75 |
| 19 | 7251090  | 7252833  | 1743   | 0.34 |
| 19 | 7422427  | 7426503  | 4076   | 0.06 |
| 19 | 7620424  | 7626579  | 6155   | 0.06 |
| 19 | 8499028  | 8523034  | 24006  | 0.23 |
| 19 | 11118289 | 11133332 | 15043  | 0.29 |
| 19 | 11173352 | 11174714 | 1362   | 0.40 |



SUPPLEMENTARY INFORMATION

|    |          |          |        |      |
|----|----------|----------|--------|------|
| 19 | 11575133 | 11579208 | 4075   | 0.17 |
| 19 | 12039015 | 12059799 | 20784  | 0.17 |
| 19 | 12389335 | 12430683 | 41348  | 0.11 |
| 19 | 13323903 | 13331981 | 8078   | 0.06 |
| 19 | 13393890 | 13400225 | 6335   | 0.06 |
| 19 | 14021847 | 14034371 | 12524  | 0.06 |
| 19 | 14382490 | 14393213 | 10723  | 0.06 |
| 19 | 14802199 | 14806157 | 3958   | 0.06 |
| 19 | 15553842 | 15566538 | 12696  | 0.34 |
| 19 | 16005214 | 16026113 | 20899  | 0.23 |
| 19 | 16456956 | 16463965 | 7009   | 0.06 |
| 19 | 16957714 | 16980331 | 22617  | 0.06 |
| 19 | 18144549 | 18175736 | 31187  | 0.06 |
| 19 | 18429834 | 18476362 | 46528  | 0.06 |
| 19 | 18736055 | 18782426 | 46371  | 0.06 |
| 19 | 20050922 | 20054666 | 3744   | 0.29 |
| 19 | 20300734 | 20308406 | 7672   | 0.06 |
| 19 | 20517745 | 20774347 | 256602 | 5.16 |
| 19 | 20729406 | 20743945 | 14539  | 0.11 |
| 19 | 20874267 | 20911271 | 37004  | 0.23 |
| 19 | 20973591 | 20983030 | 9439   | 1.72 |
| 19 | 21208316 | 21217326 | 9010   | 0.06 |
| 19 | 21561810 | 21565585 | 3775   | 0.06 |
| 19 | 21566912 | 21574212 | 7300   | 0.06 |
| 19 | 21777605 | 21787532 | 9927   | 0.17 |
| 19 | 23190196 | 23247634 | 57438  | 0.17 |
| 19 | 29427670 | 29430164 | 2494   | 0.06 |
| 19 | 29491118 | 29508333 | 17215  | 0.11 |
| 19 | 30826297 | 30827451 | 1154   | 2.52 |
| 19 | 32553186 | 32558150 | 4964   | 0.06 |
| 19 | 33385488 | 33415858 | 30370  | 0.29 |
| 19 | 35393607 | 35396746 | 3139   | 0.06 |
| 19 | 36365349 | 36369320 | 3971   | 0.06 |
| 19 | 36459269 | 36472735 | 13466  | 0.11 |
| 19 | 36858363 | 36867409 | 9046   | 0.06 |
| 19 | 37539101 | 37541197 | 2096   | 0.06 |
| 19 | 39630318 | 39632896 | 2578   | 0.06 |
| 19 | 41144662 | 41163234 | 18572  | 0.11 |
| 19 | 41460735 | 41501029 | 40294  | 0.46 |
| 19 | 41514643 | 41527927 | 13284  | 0.06 |
| 19 | 41684301 | 41691199 | 6898   | 0.06 |
| 19 | 42739884 | 43344645 | 604761 | 4.82 |
| 19 | 44389361 | 44434513 | 45152  | 0.23 |
| 19 | 44454835 | 44458652 | 3817   | 0.57 |
| 19 | 46052953 | 46067397 | 14444  | 0.06 |
| 19 | 46213459 | 46233669 | 20210  | 0.06 |

SUPPLEMENTARY INFORMATION

|    |          |          |        |      |
|----|----------|----------|--------|------|
| 19 | 47289928 | 47318881 | 28953  | 0.11 |
| 19 | 48055029 | 48079982 | 24953  | 0.34 |
| 19 | 48702748 | 48705753 | 3005   | 0.06 |
| 19 | 49869505 | 49883083 | 13578  | 0.06 |
| 19 | 50194630 | 50196835 | 2205   | 0.06 |
| 19 | 50357351 | 50367890 | 10539  | 0.06 |
| 19 | 50378562 | 50389547 | 10985  | 0.06 |
| 19 | 50397768 | 50417880 | 20112  | 0.17 |
| 19 | 50795609 | 50798809 | 3200   | 0.06 |
| 19 | 51232344 | 51236512 | 4168   | 0.06 |
| 19 | 51624491 | 51629139 | 4648   | 0.06 |
| 19 | 51723207 | 51729071 | 5864   | 0.06 |
| 19 | 52262690 | 52274366 | 11676  | 0.92 |
| 19 | 53061869 | 53066715 | 4846   | 0.06 |
| 19 | 53287985 | 53295692 | 7707   | 0.06 |
| 19 | 53429042 | 53511584 | 82542  | 0.11 |
| 19 | 53798030 | 53805300 | 7270   | 0.06 |
| 19 | 54129140 | 54133660 | 4520   | 0.11 |
| 19 | 54172738 | 54175471 | 2733   | 0.11 |
| 19 | 54481397 | 54662761 | 181364 | 0.06 |
| 19 | 54947433 | 54986475 | 39042  | 0.17 |
| 19 | 55224031 | 55231895 | 7864   | 0.11 |
| 19 | 55991992 | 55998854 | 6862   | 0.06 |
| 19 | 56062244 | 56071940 | 9696   | 0.06 |
| 19 | 56740087 | 56743612 | 3525   | 0.29 |
| 19 | 56961145 | 56969373 | 8228   | 0.46 |
| 19 | 58026679 | 58032424 | 5745   | 0.23 |
| 20 | 1696297  | 1698104  | 1807   | 0.06 |
| 20 | 2558741  | 2561780  | 3039   | 0.06 |
| 20 | 2901348  | 2928644  | 27296  | 0.11 |
| 20 | 3899481  | 3904453  | 4972   | 0.06 |
| 20 | 5507202  | 5513196  | 5994   | 0.06 |
| 20 | 5592311  | 5601811  | 9500   | 0.06 |
| 20 | 7097053  | 7107791  | 10738  | 0.17 |
| 20 | 9006598  | 9028516  | 21918  | 0.06 |
| 20 | 9712122  | 9729521  | 17399  | 0.29 |
| 20 | 12407561 | 12545151 | 137590 | 0.29 |
| 20 | 12961031 | 12970412 | 9381   | 0.17 |
| 20 | 14290118 | 14298581 | 8463   | 0.06 |
| 20 | 14438097 | 14477903 | 39806  | 0.57 |
| 20 | 14748976 | 14899681 | 150705 | 0.57 |
| 20 | 14903486 | 14936623 | 33137  | 0.06 |
| 20 | 15646095 | 15661936 | 15841  | 0.11 |
| 20 | 15770355 | 15783700 | 13345  | 0.17 |
| 20 | 16095377 | 16103137 | 7760   | 1.38 |
| 20 | 16682424 | 16685408 | 2984   | 0.34 |

SUPPLEMENTARY INFORMATION

|    |          |          |       |      |
|----|----------|----------|-------|------|
| 20 | 17614825 | 17638275 | 23450 | 0.23 |
| 20 | 18269010 | 18272729 | 3719  | 0.11 |
| 20 | 19012470 | 19020843 | 8373  | 0.06 |
| 20 | 19169698 | 19182638 | 12940 | 0.23 |
| 20 | 22342087 | 22349259 | 7172  | 0.40 |
| 20 | 22362468 | 22369888 | 7420  | 0.06 |
| 20 | 22393676 | 22402402 | 8726  | 0.06 |
| 20 | 23187139 | 23194046 | 6907  | 1.84 |
| 20 | 24436524 | 24439555 | 3031  | 0.06 |
| 20 | 32297780 | 32327658 | 29878 | 0.06 |
| 20 | 32456388 | 32470559 | 14171 | 0.11 |
| 20 | 32929983 | 32932914 | 2931  | 0.06 |
| 20 | 33090954 | 33100524 | 9570  | 0.06 |
| 20 | 35269203 | 35278049 | 8846  | 0.06 |
| 20 | 37521471 | 37522702 | 1231  | 0.06 |
| 20 | 38252497 | 38259681 | 7184  | 0.06 |
| 20 | 40195143 | 40199901 | 4758  | 0.06 |
| 20 | 42430346 | 42432573 | 2227  | 0.06 |
| 20 | 42553671 | 42571017 | 17346 | 0.06 |
| 20 | 42621393 | 42649685 | 28292 | 0.80 |
| 20 | 43114342 | 43119491 | 5149  | 0.06 |
| 20 | 43565968 | 43572296 | 6328  | 0.23 |
| 20 | 45822913 | 45827251 | 4338  | 0.06 |
| 20 | 47431079 | 47451780 | 20701 | 0.11 |
| 20 | 48882019 | 48883538 | 1519  | 0.75 |
| 20 | 49991211 | 49994803 | 3592  | 0.06 |
| 20 | 50452721 | 50460356 | 7635  | 0.06 |
| 20 | 50662198 | 50672690 | 10492 | 0.06 |
| 20 | 50680041 | 50690397 | 10356 | 0.06 |
| 20 | 50751280 | 50775369 | 24089 | 0.17 |
| 20 | 51134734 | 51141135 | 6401  | 0.11 |
| 20 | 51859193 | 51895977 | 36784 | 0.29 |
| 20 | 51948629 | 52000847 | 52218 | 0.29 |
| 20 | 52206766 | 52210061 | 3295  | 0.06 |
| 20 | 53218826 | 53227195 | 8369  | 0.11 |
| 20 | 53472262 | 53478881 | 6619  | 0.06 |
| 20 | 53725130 | 53729867 | 4737  | 0.06 |
| 20 | 55453377 | 55463974 | 10597 | 0.06 |
| 20 | 57892036 | 57896547 | 4511  | 0.06 |
| 20 | 59721097 | 59738411 | 17314 | 0.29 |
| 20 | 60014013 | 60025147 | 11134 | 0.06 |
| 20 | 61068286 | 61069423 | 1137  | 0.29 |
| 20 | 61590949 | 61592121 | 1172  | 0.06 |
| 20 | 61881019 | 61882797 | 1778  | 0.06 |
| 20 | 63081166 | 63114187 | 33021 | 0.29 |
| 20 | 63374931 | 63391446 | 16515 | 0.11 |

SUPPLEMENTARY INFORMATION

|    |          |          |        |      |
|----|----------|----------|--------|------|
| 20 | 63688889 | 63704214 | 15325  | 0.23 |
| 20 | 63789957 | 63819726 | 29769  | 0.34 |
| 21 | 14029377 | 14045474 | 16097  | 0.06 |
| 21 | 14291719 | 14294855 | 3136   | 0.06 |
| 21 | 14428641 | 14443573 | 14932  | 0.06 |
| 21 | 14703410 | 14705988 | 2578   | 0.06 |
| 21 | 16292355 | 16295458 | 3103   | 0.06 |
| 21 | 17671053 | 17674435 | 3382   | 0.17 |
| 21 | 21051010 | 21078185 | 27175  | 0.06 |
| 21 | 21177234 | 21182954 | 5720   | 0.06 |
| 21 | 21483538 | 21494766 | 11228  | 0.11 |
| 21 | 22804542 | 22833225 | 28683  | 0.75 |
| 21 | 22951909 | 23082655 | 130746 | 1.03 |
| 21 | 23120376 | 23267071 | 146695 | 0.23 |
| 21 | 23310475 | 23331997 | 21522  | 0.06 |
| 21 | 24123601 | 24134373 | 10772  | 0.06 |
| 21 | 24660054 | 24672091 | 12037  | 0.06 |
| 21 | 25088844 | 25095887 | 7043   | 0.06 |
| 21 | 26652378 | 26656503 | 4125   | 0.40 |
| 21 | 27006205 | 27034820 | 28615  | 0.11 |
| 21 | 27167631 | 27177342 | 9711   | 0.23 |
| 21 | 27464543 | 27472174 | 7631   | 0.11 |
| 21 | 27812806 | 27819704 | 6898   | 0.06 |
| 21 | 28754173 | 28755967 | 1794   | 0.11 |
| 21 | 29118852 | 29127576 | 8724   | 0.06 |
| 21 | 30529083 | 30693503 | 164420 | 0.06 |
| 21 | 30813490 | 30822200 | 8710   | 0.06 |
| 21 | 31314593 | 31318848 | 4255   | 0.06 |
| 21 | 35078544 | 35080052 | 1508   | 0.06 |
| 21 | 35188777 | 35193227 | 4450   | 0.29 |
| 21 | 36635495 | 36642922 | 7427   | 0.06 |
| 21 | 36779087 | 36785349 | 6262   | 0.17 |
| 21 | 37305994 | 37341883 | 35889  | 1.15 |
| 21 | 37737174 | 37742921 | 5747   | 0.63 |
| 21 | 38277627 | 38283071 | 5444   | 0.40 |
| 21 | 38539698 | 38544832 | 5134   | 0.17 |
| 21 | 38562277 | 38568966 | 6689   | 0.06 |
| 21 | 41425679 | 41428539 | 2860   | 0.06 |
| 21 | 41955702 | 41958976 | 3274   | 0.11 |
| 21 | 41987559 | 41990376 | 2817   | 0.11 |
| 21 | 42445480 | 42446949 | 1469   | 0.06 |
| 21 | 42849478 | 42854987 | 5509   | 0.06 |
| 21 | 43166998 | 43174596 | 7598   | 0.17 |
| 21 | 43281032 | 43297318 | 16286  | 0.06 |
| 21 | 43360714 | 43382137 | 21423  | 0.17 |
| 21 | 43397020 | 43404312 | 7292   | 0.17 |

SUPPLEMENTARY INFORMATION

|    |          |          |        |      |
|----|----------|----------|--------|------|
| 21 | 43814270 | 43826895 | 12625  | 0.92 |
| 21 | 44210503 | 44211628 | 1125   | 0.06 |
| 21 | 44216504 | 44244374 | 27870  | 0.17 |
| 21 | 44391460 | 44414033 | 22573  | 1.20 |
| 21 | 44575059 | 44597773 | 22714  | 0.11 |
| 21 | 45265260 | 45266911 | 1651   | 0.06 |
| 21 | 45668360 | 45693763 | 25403  | 0.34 |
| 21 | 45975479 | 46011117 | 35638  | 1.03 |
| 22 | 18857119 | 19022636 | 165517 | 0.80 |
| 22 | 19709424 | 19743577 | 34153  | 0.69 |
| 22 | 19954180 | 19992777 | 38597  | 0.86 |
| 22 | 20595197 | 20613163 | 17966  | 0.17 |
| 22 | 20990595 | 21003313 | 12718  | 0.11 |
| 22 | 21089741 | 21099699 | 9958   | 0.06 |
| 22 | 21958756 | 22219245 | 260489 | 0.34 |
| 22 | 22362959 | 22380302 | 17343  | 0.06 |
| 22 | 23203247 | 23230332 | 27085  | 0.17 |
| 22 | 24831727 | 24832749 | 1022   | 0.06 |
| 22 | 25268027 | 25532662 | 264635 | 1.15 |
| 22 | 26398136 | 26405009 | 6873   | 0.11 |
| 22 | 26721727 | 26733889 | 12162  | 0.06 |
| 22 | 27259064 | 27261546 | 2482   | 0.11 |
| 22 | 29061594 | 29063646 | 2052   | 0.06 |
| 22 | 31494313 | 31511999 | 17686  | 0.06 |
| 22 | 31790018 | 31805785 | 15767  | 0.11 |
| 22 | 32543490 | 32547755 | 4265   | 0.06 |
| 22 | 33720552 | 33728990 | 8438   | 0.06 |
| 22 | 34451779 | 34455385 | 3606   | 0.06 |
| 22 | 34543323 | 34585637 | 42314  | 1.95 |
| 22 | 34711004 | 34719922 | 8918   | 0.40 |
| 22 | 35012904 | 35019789 | 6885   | 0.06 |
| 22 | 36045986 | 36095458 | 49472  | 0.06 |
| 22 | 36548793 | 36561259 | 12466  | 0.34 |
| 22 | 37127968 | 37132566 | 4598   | 0.11 |
| 22 | 37295577 | 37300514 | 4937   | 0.06 |
| 22 | 37583257 | 37588857 | 5600   | 0.34 |
| 22 | 37918171 | 37942015 | 23844  | 0.57 |
| 22 | 38281769 | 38287631 | 5862   | 0.06 |
| 22 | 38968338 | 38996475 | 28137  | 2.18 |
| 22 | 39375109 | 39383361 | 8252   | 0.06 |
| 22 | 40408928 | 40425814 | 16886  | 0.11 |
| 22 | 40575699 | 40595416 | 19717  | 0.06 |
| 22 | 40866848 | 40900306 | 33458  | 0.06 |
| 22 | 41104746 | 41108238 | 3492   | 0.11 |
| 22 | 42475109 | 42481995 | 6886   | 0.06 |
| 22 | 42561282 | 42569638 | 8356   | 0.06 |

SUPPLEMENTARY INFORMATION

|    |          |          |       |      |
|----|----------|----------|-------|------|
| 22 | 43153990 | 43191484 | 37494 | 0.06 |
| 22 | 43236094 | 43250895 | 14801 | 0.29 |
| 22 | 43268338 | 43278939 | 10601 | 0.06 |
| 22 | 44798454 | 44802667 | 4213  | 0.06 |
| 22 | 44841806 | 44849050 | 7244  | 0.23 |
| 22 | 45368285 | 45394931 | 26646 | 0.17 |
| 22 | 45907443 | 45914050 | 6607  | 0.29 |
| 22 | 45916222 | 45935151 | 18929 | 0.46 |
| 22 | 46087068 | 46129298 | 42230 | 1.43 |
| 22 | 46238199 | 46240110 | 1911  | 0.06 |
| 22 | 46452922 | 46457033 | 4111  | 0.06 |
| 22 | 46663095 | 46690524 | 27429 | 0.06 |
| 22 | 48000033 | 48009083 | 9050  | 0.06 |
| 22 | 48039744 | 48041908 | 2164  | 0.06 |
| 22 | 48525853 | 48531736 | 5883  | 0.06 |
| 22 | 48610645 | 48611710 | 1065  | 0.06 |
| 22 | 48613648 | 48622839 | 9191  | 0.29 |
| 22 | 48741140 | 48769986 | 28846 | 0.86 |
| 22 | 48821286 | 48824177 | 2891  | 0.11 |
| 22 | 48893636 | 48897492 | 3856  | 0.06 |
| 22 | 48998097 | 49025325 | 27228 | 0.06 |
| 22 | 49076812 | 49081089 | 4277  | 0.23 |
| 22 | 49422634 | 49467384 | 44750 | 0.06 |

---

Chr: chromosome; bp: base pair

Human genome assembly: GRCh38

SUPPLEMENTARY INFORMATION

**Supplementary Table 2. Association of structural variations with asthma susceptibility in children from Salvador**

| Chr                        | Start     | End       | Freq. Case | Freq. Ctrl | OR  | 95% CI   | P           |
|----------------------------|-----------|-----------|------------|------------|-----|----------|-------------|
| <b><i>Duplications</i></b> |           |           |            |            |     |          |             |
| 1                          | 154945225 | 155087375 | 2.1        | 0.8        | 2.5 | 0.9-6.5  | 0.06        |
| 2                          | 132000728 | 132297217 | 9.8        | 6.7        | 1.5 | 0.9-2.3  | 0.08        |
| 2                          | 227376905 | 227394586 | 1.6        | 2.1        | 0.8 | 0.3-1.9  | 0.6         |
| 3                          | 75370585  | 75891946  | 6.1        | 5.9        | 1.0 | 0.6-1.6  | 0.9         |
| 3                          | 95437291  | 95548133  | 2.9        | 2.0        | 1.7 | 0.8-3.7  | 0.2         |
| 3                          | 164283490 | 164410087 | 2.4        | 2.4        | 1.2 | 0.53-2.5 | 0.7         |
| 4                          | 31791952  | 31895086  | 1.1        | 1.5        | 0.8 | 0.2-2.3  | 0.6         |
| 4                          | 68812961  | 68850046  | 2.1        | 0.7        | 3.2 | 1.2-8.5  | <b>0.02</b> |
| 4                          | 174696163 | 174724266 | 1.9        | 1.3        | 1.5 | 0.6-3.6  | 0.4         |
| 5                          | 84790666  | 84803174  | 1.3        | 1.5        | 1.0 | 0.4-2.8  | 0.9         |
| 6                          | 34213903  | 34265377  | 2.9        | 1.3        | 2.1 | 0.9-4.7  | 0.06        |
| 7                          | 26185559  | 26224658  | 1.3        | 2.3        | 0.6 | 0.2-1.5  | 0.2         |
| 7                          | 62744672  | 63252790  | 4.0        | 3.1        | 1.4 | 0.7-2.6  | 0.3         |
| 11                         | 1120324   | 1649253   | 5.9        | 5.0        | 1.2 | 0.7-2.1  | 0.4         |
| 11                         | 2044100   | 2082296   | 1.1        | 1.3        | 0.7 | 0.2-2.1  | 0.5         |
| 11                         | 50220667  | 50821348  | 7.7        | 5.2        | 1.9 | 1.1-3.4  | <b>0.03</b> |
| 11                         | 65749835  | 65799248  | 4.0        | 3.9        | 1.0 | 0.6-1.9  | 0.9         |
| 11                         | 65816789  | 65969132  | 4.8        | 3.4        | 1.4 | 0.8-2.4  | 0.3         |
| 12                         | 11304779  | 11325747  | 1.6        | 1.1        | 1.2 | 0.5-2.9  | 0.7         |
| 13                         | 36963500  | 36982862  | 1.9        | 1.4        | 1.3 | 0.5-3.2  | 0.6         |
| 14                         | 100132248 | 100256325 | 3.2        | 2.6        | 1.2 | 0.6-2.5  | 0.5         |
| 16                         | 87375682  | 87411805  | 2.7        | 1.0        | 2.6 | 1.1-6.1  | <b>0.03</b> |
| 17                         | 14296292  | 14316169  | 2.4        | 0.9        | 2.8 | 1.1-6.8  | <b>0.03</b> |
| 19                         | 3479373   | 3703130   | 4.5        | 4.6        | 0.9 | 0.5-1.7  | 0.9         |
| 19                         | 3738651   | 3805890   | 2.1        | 2.7        | 0.8 | 0.4-1.8  | 0.6         |
| 19                         | 8493358   | 8529661   | 1.1        | 1.7        | 0.6 | 0.2-1.8  | 0.4         |
| 19                         | 15667349  | 15727059  | 6.1        | 3.7        | 1.8 | 1.1-3.1  | <b>0.03</b> |
| 19                         | 32383819  | 32388358  | 2.4        | 1.0        | 2.5 | 1.0-6.2  | <b>0.04</b> |
| 19                         | 36096969  | 36129876  | 1.3        | 1.2        | 0.9 | 0.3-2.7  | 0.9         |
| 19                         | 48395295  | 48514469  | 3.2        | 1.5        | 1.9 | 0.9-4.0  | 0.09        |
| 20                         | 60992315  | 61014216  | 1.9        | 1.4        | 1.3 | 0.5-3.2  | 0.5         |
| <b><i>Deletions</i></b>    |           |           |            |            |     |          |             |
| 1                          | 1622382   | 1736859   | 0.3        | 1.3        | 0.2 | 0.02-1.4 | 0.1         |
| 1                          | 22173037  | 22183413  | 1.3        | 1.3        | 1.3 | 0.5-3.7  | 0.6         |
| 1                          | 61939375  | 61990763  | 0.5        | 1.3        | 0.4 | 0.09-1.7 | 0.2         |
| 1                          | 103612312 | 103668424 | 1.6        | 1.2        | 1.4 | 0.5-3.7  | 0.5         |
| 1                          | 105764986 | 105774609 | 1.3        | 1.2        | 1.2 | 0.4-3.1  | 0.8         |
| 1                          | 161519677 | 161649951 | 4.0        | 4.5        | 0.8 | 0.5-1.5  | 0.5         |
| 1                          | 196753917 | 196949015 | 2.1        | 2.9        | 0.7 | 0.3-1.5  | 0.4         |
| 1                          | 210429364 | 210441720 | 0.8        | 1.5        | 0.5 | 0.1-1.7  | 0.3         |
| 2                          | 4263430   | 4277582   | 3.5        | 2.4        | 1.4 | 0.7-2.8  | 0.3         |
| 2                          | 35295108  | 35411515  | 1.1        | 1.0        | 0.9 | 0.3-3.1  | 0.9         |

SUPPLEMENTARY INFORMATION

|   |           |           |     |      |     |          |               |
|---|-----------|-----------|-----|------|-----|----------|---------------|
| 2 | 57175857  | 57248779  | 1.9 | 1.5  | 1.1 | 0.5-2.7  | 0.8           |
| 2 | 67532940  | 67539817  | 1.9 | 1.3  | 1.4 | 0.6-3.5  | 0.5           |
| 2 | 112295484 | 112340863 | 1.3 | 1.1  | 1.2 | 0.4-3.5  | 0.7           |
| 2 | 125861332 | 125910808 | 1.3 | 1.2  | 1.5 | 0.4-2.9  | 0.9           |
| 2 | 127794853 | 127797562 | 1.3 | 1.2  | 1.2 | 0.4-3.5  | 0.7           |
| 2 | 163582547 | 163588672 | 2.1 | 1.2  | 1.8 | 0.8-4.2  | 0.2           |
| 2 | 183798045 | 184036734 | 2.1 | 3.1  | 0.7 | 0.3-1.5  | 0.3           |
| 2 | 184174332 | 184270717 | 3.2 | 1.4  | 2.4 | 1.1-5.1  | <b>0.03</b>   |
| 2 | 217392920 | 217396646 | 1.3 | 1.3  | 1.1 | 0.4-3.2  | 0.8           |
| 3 | 106500281 | 106515006 | 1.6 | 1.6  | 0.9 | 0.3-2.2  | 0.8           |
| 3 | 159075161 | 159095191 | 1.6 | 1.8  | 0.9 | 0.4-2.4  | 0.9           |
| 4 | 3483685   | 3532851   | 1.3 | 2.4  | 0.5 | 0.2-1.3  | 0.2           |
| 4 | 14910729  | 14938665  | 6.1 | 3.1  | 1.9 | 1.1-3.3  | <b>0.02</b>   |
| 4 | 39568333  | 39742743  | 0.0 | 1.4  | -   | -        | -             |
| 4 | 45008827  | 45035653  | 3.7 | 2.9  | 1.2 | 0.6-2.2  | 0.7           |
| 4 | 68527638  | 68623755  | 2.7 | 3.1  | 0.9 | 0.4-1.8  | 0.7           |
| 4 | 111371861 | 111386488 | 2.1 | 3.1  | 0.7 | 0.3-1.5  | 0.4           |
| 4 | 143832994 | 144093819 | 2.4 | 4.5  | 0.5 | 0.2-1.0  | 0.06          |
| 4 | 186921989 | 186929178 | 2.1 | 1.8  | 1.2 | 0.5-2.7  | 0.7           |
| 5 | 661741    | 873886    | 2.1 | 3.0  | 0.7 | 0.3-1.6  | 0.4           |
| 5 | 79125957  | 79215563  | 2.7 | 3.4  | 0.7 | 0.3-1.4  | 0.3           |
| 5 | 97367538  | 98689505  | 2.4 | 1.5  | 1.8 | 0.8-3.9  | 0.1           |
| 5 | 113816844 | 113836766 | 1.6 | 1.4  | 1.1 | 0.4-2.8  | 0.9           |
| 5 | 177944712 | 177974508 | 2.4 | 0.7  | 4.6 | 1.7-12.2 | <b>0.002</b>  |
| 6 | 26344105  | 26352025  | 3.5 | 3.4  | 0.9 | 0.5-1.9  | 0.9           |
| 6 | 29517512  | 29534259  | 0.5 | 1.2  | 0.4 | 0.09-1.7 | 0.2           |
| 6 | 29889788  | 29931412  | 6.6 | 2.4  | 2.9 | 1.7-5.2  | <b>0.0002</b> |
| 6 | 31387541  | 31488621  | 2.1 | 1.8  | 1.2 | 0.5-2.7  | 0.7           |
| 6 | 66238936  | 66726868  | 1.6 | 2.1  | 0.8 | 0.3-1.9  | 0.6           |
| 6 | 78149819  | 78467228  | 2.4 | 3.4  | 0.7 | 0.3-1.3  | 0.2           |
| 6 | 80575520  | 80584120  | 0.8 | 1.8  | 0.4 | 0.1-1.5  | 0.2           |
| 6 | 168040800 | 168093484 | 0.8 | 1.4  | 0.5 | 0.2-1.8  | 0.3           |
| 7 | 4315576   | 4495828   | 1.1 | 1.2  | 0.8 | 0.2-2.3  | 0.6           |
| 7 | 13068725  | 13090051  | 3.7 | 1.9  | 1.7 | 0.9-3.4  | 0.1           |
| 7 | 20267888  | 20288064  | 3.5 | 3.0  | 0.9 | 0.5-1.9  | 0.9           |
| 7 | 38256357  | 38338702  | 8.8 | 10.4 | 0.7 | 0.5-1.1  | 0.2           |
| 7 | 62742653  | 62997884  | 4.5 | 4.4  | 1.1 | 0.6-1.9  | 0.9           |
| 7 | 111140642 | 111443435 | 3.2 | 2.3  | 1.3 | 0.7-2.7  | 0.4           |
| 7 | 118487954 | 118530461 | 3.7 | 1.9  | 1.6 | 0.8-3.3  | 0.2           |
| 7 | 148934474 | 148947457 | 1.3 | 2.1  | 0.6 | 0.2-1.6  | 0.3           |
| 7 | 153497075 | 153509603 | 1.3 | 1.2  | 1.1 | 0.4-3.2  | 0.8           |
| 7 | 155093527 | 155097474 | 1.6 | 1.5  | 1.1 | 0.4-2.8  | 0.8           |
| 8 | 6101073   | 6126814   | 4.0 | 1.5  | 2.6 | 1.3-5.2  | <b>0.009</b>  |
| 8 | 13652018  | 13756130  | 2.9 | 2.0  | 1.6 | 0.8-3.4  | 0.2           |
| 8 | 57442391  | 57454399  | 1.1 | 1.2  | 0.8 | 0.3-2.5  | 0.7           |
| 8 | 136673185 | 136849837 | 1.1 | 1.2  | 0.8 | 0.3-2.6  | 0.8           |



SUPPLEMENTARY INFORMATION

|    |           |           |      |     |     |          |               |
|----|-----------|-----------|------|-----|-----|----------|---------------|
| 9  | 11640367  | 12182768  | 2.4  | 2.8 | 0.8 | 0.4-1.8  | 0.7           |
| 9  | 28672394  | 28776754  | 1.3  | 1.3 | 1.1 | 0.4-3.1  | 0.9           |
| 9  | 103005945 | 103023251 | 1.1  | 1.2 | 0.8 | 0.2-2.4  | 0.6           |
| 9  | 103954708 | 103958400 | 1.3  | 1.3 | 0.8 | 0.3-2.2  | 0.6           |
| 9  | 111702207 | 111707858 | 1.1  | 1.1 | 1.0 | 0.3-3.2  | 0.9           |
| 10 | 26395163  | 26402038  | 1.6  | 2.7 | 0.5 | 0.2-1.3  | 0.1           |
| 10 | 53167918  | 53177475  | 2.7  | 1.3 | 2.0 | 0.9-4.3  | 0.09          |
| 10 | 55099774  | 55361364  | 3.2  | 1.5 | 2.1 | 1.0-4.4  | <b>0.05</b>   |
| 10 | 86653055  | 86663766  | 1.1  | 1.0 | 0.9 | 0.3-2.7  | 0.8           |
| 10 | 90237985  | 90242355  | 1.1  | 2.1 | 0.4 | 0.1-1.2  | 0.1           |
| 10 | 108543367 | 108557547 | 2.9  | 2.7 | 1.0 | 0.5-2.0  | 0.9           |
| 11 | 5844060   | 5869835   | 12.2 | 8.0 | 1.5 | 1.0-2.2  | <b>0.03</b>   |
| 11 | 25564364  | 25909715  | 6.9  | 6.7 | 0.9 | 0.6-1.5  | 0.8           |
| 11 | 77177028  | 77208958  | 1.1  | 1.3 | 0.7 | 0.2-2.2  | 0.6           |
| 11 | 87675905  | 87743887  | 4.0  | 1.9 | 1.9 | 1.0-3.8  | <b>0.05</b>   |
| 11 | 105053115 | 105060146 | 3.5  | 4.4 | 0.8 | 0.4-1.4  | 0.4           |
| 11 | 121999668 | 122030128 | 1.9  | 1.1 | 1.5 | 0.6-3.8  | 0.4           |
| 12 | 2136728   | 2150500   | 1.1  | 1.5 | 0.6 | 0.2-1.9  | 0.4           |
| 12 | 15415250  | 15421148  | 1.3  | 1.0 | 1.3 | 0.5-3.6  | 0.6           |
| 12 | 76100309  | 76136590  | 1.6  | 1.4 | 1.0 | 0.4-2.7  | 0.9           |
| 12 | 128072414 | 128093983 | 1.6  | 1.0 | 1.6 | 0.6-4.2  | 0.4           |
| 12 | 131245772 | 131340814 | 1.3  | 1.0 | 1.2 | 0.4-3.3  | 0.8           |
| 13 | 32097968  | 32099700  | 0.8  | 1.1 | 0.7 | 0.2-2.3  | 0.6           |
| 13 | 57239433  | 57387355  | 2.4  | 2.0 | 1.1 | 0.5-2.4  | 0.8           |
| 13 | 76036154  | 76039093  | 0.3  | 1.6 | 0.1 | 0.02-0.9 | <b>0.04</b>   |
| 13 | 83527345  | 83582139  | 3.5  | 1.2 | 3.4 | 1.6-7.5  | <b>0.002</b>  |
| 13 | 85285616  | 85308725  | 1.6  | 1.3 | 1.3 | 0.5-3.5  | 0.6           |
| 13 | 86684237  | 86934184  | 9.8  | 6.6 | 1.5 | 0.9-2.3  | 0.06          |
| 13 | 96268166  | 96274136  | 1.6  | 0.9 | 1.6 | 0.6-4.2  | 0.3           |
| 14 | 20215935  | 20275110  | 1.3  | 1.1 | 1.1 | 0.4-3.2  | 0.8           |
| 14 | 20877548  | 20952929  | 5.1  | 4.5 | 1.1 | 0.6-1.9  | 0.7           |
| 14 | 28105513  | 28483881  | 1.1  | 1.2 | 0.7 | 0.2-2.2  | 0.6           |
| 14 | 94945834  | 94953775  | 1.6  | 2.3 | 0.6 | 0.2-1.4  | 0.3           |
| 15 | 24112065  | 24518827  | 3.5  | 2.3 | 1.8 | 0.9-3.6  | 0.09          |
| 15 | 32216889  | 32327926  | 1.9  | 2.3 | 0.8 | 0.4-1.8  | 0.6           |
| 16 | 28591670  | 28618832  | 1.1  | 1.5 | 0.8 | 0.3-2.3  | 0.7           |
| 16 | 32457714  | 32638415  | 0.8  | 6.3 | 0.1 | 0.04-0.4 | <b>0.0006</b> |
| 16 | 34025437  | 34117342  | 3.2  | 3.0 | 1.1 | 0.5-2.1  | 0.9           |
| 16 | 76630598  | 76637010  | 3.7  | 2.0 | 2.0 | 1.0-3.9  | <b>0.04</b>   |
| 17 | 19590814  | 19634157  | 3.5  | 4.1 | 0.9 | 0.5-1.6  | 0.7           |
| 17 | 73750237  | 73752292  | 0.5  | 1.6 | 0.3 | 0.07-1.4 | 0.1           |
| 18 | 4329893   | 4335067   | 2.1  | 0.8 | 2.2 | 0.8-5.6  | 0.1           |
| 18 | 5926003   | 5934150   | 1.6  | 1.2 | 1.3 | 0.5-3.3  | 0.6           |
| 18 | 67629278  | 67651557  | 2.9  | 4.0 | 0.7 | 0.4-1.4  | 0.4           |
| 19 | 20517745  | 20774347  | 4.8  | 5.3 | 0.8 | 0.5-1.4  | 0.5           |
| 19 | 20973591  | 20983030  | 2.7  | 1.5 | 1.6 | 0.7-3.4  | 0.2           |

SUPPLEMENTARY INFORMATION

|    |          |          |     |     |     |          |      |
|----|----------|----------|-----|-----|-----|----------|------|
| 19 | 30826297 | 30827451 | 3.2 | 2.3 | 1.3 | 0.6-2.7  | 0.4  |
| 19 | 42739884 | 43344645 | 4.3 | 5.0 | 0.9 | 0.5-1.6  | 0.6  |
| 20 | 16095377 | 16103137 | 1.1 | 1.5 | 0.7 | 0.2-2.0  | 0.5  |
| 20 | 23187139 | 23194046 | 1.6 | 1.9 | 0.8 | 0.3-2.0  | 0.7  |
| 21 | 22951909 | 23082655 | 1.6 | 0.9 | 1.7 | 0.6-4.5  | 0.3  |
| 21 | 37305994 | 37341883 | 0.8 | 1.2 | 0.6 | 0.2-1.9  | 0.4  |
| 21 | 44391460 | 44414033 | 0.8 | 1.3 | 0.5 | 0.1-1.6  | 0.2  |
| 21 | 45975479 | 46011117 | 0.5 | 1.2 | 0.4 | 0.1-1.9  | 0.3  |
| 22 | 25268027 | 25532662 | 0.8 | 1.2 | 0.6 | 0.2-2.2  | 0.4  |
| 22 | 34543323 | 34585637 | 1.9 | 2.0 | 0.8 | 0.3-1.9  | 0.7  |
| 22 | 38968338 | 38996475 | 3.5 | 1.8 | 1.9 | 0.9-3.8  | 0.07 |
| 22 | 46087068 | 46129298 | 0.5 | 1.7 | 0.3 | 0.07-1.3 | 0.1  |

Chr: Chromosome; Coordinates in base pair; Frequency of CNVR (%); OR, odds ratio; 95% CI, 95% confidence interval; p, p value (additive model)

Covariates in multivariate analysis: sex, age, Log<sub>2</sub> of R Ratio standard deviation (LRRSD) and principal components (PC1, PC2 and PC3)

Human genome assembly: GRCh38

SUPPLEMENTARY INFORMATION

**Supplementary Table 3. The deletion at 6p22.1 is nominally associated with asthma in individuals with different ancestry compositions**

| CNVR                           | EUR (%)<br>median | Freq.<br>Case | Freq.<br>Ctrl | OR  | SE  | 95% CI  | p            |
|--------------------------------|-------------------|---------------|---------------|-----|-----|---------|--------------|
| <b><u>Salvador, Brazil</u></b> | > 42              | 0.068         | 0.028         | 2.6 | 0.4 | 1.3-5.4 | <b>0.01</b>  |
| del 6:29,889,788-29,931,412    | ≤ 42              | 0.059         | 0.017         | 3.8 | 0.4 | 1.6-8.9 | <b>0.002</b> |
| <b><u>Pelotas, Brazil</u></b>  | > 84              | 0.049         | 0.026         | 1.8 | 0.3 | 1.2-3.0 | <b>0.03</b>  |
| del 6:29,881,842-29,931,412    | ≤ 84              | 0.034         | 0.018         | 1.8 | 0.3 | 1.1-3.4 | <b>0.04</b>  |

CNVR: Copy number variation region, chromosome:start-end; EUR (%) median: European ancestry composition (ADMIXTURE method); Frequency of CNVR (%); Case: asthmatic; Ctrl: non-asthmatic; OR, odds ratio; SE, SE of odds ratio (OR); 95% CI, 95% confidence interval; p, p value (additive model)

Covariates in multivariate analysis: sex, age, Log<sub>2</sub> of R Ratio standard deviation (LRRSD) and principal components (PC1, PC2 and PC3)

Human genome assembly: GRCh38
